# Supplementary material for: Delineating the trajectories of social and occupational functioning of young people attending early intervention mental health services in Australia: a longitudinal study
Source: PubMed Central journal article supplement — BMJ Open. 2018 Mar 27;8(3):e020678. doi: 10.1136/bmjopen-2017-020678 (PMC5875606; doi:10.1136/bmjopen-2017-020678), 2018-03-27
Supplement: bmjopen-2017-020678.draft_revisions.pdf [file bmjopen-2017-020678.draft_revisions.pdf]

# BMJ Open

BMJ Open is committed to open peer review. As part of this commitment we make the peer review history of every article we publish publicly available.

When an article is published we post the peer reviewers' comments and the authors' responses online. We also post the versions of the paper that were used during peer review. These are the versions that the peer review comments apply to.

The versions of the paper that follow are the versions that were submitted during the peer review process. They are not the versions of record or the final published versions. They should not be cited or distributed as the published version of this manuscript.

BMJ Open is an open access journal and the full, final, typeset and author-corrected version of record of the manuscript is available on our site with no access controls, subscription charges or pay-per-view fees (<http://bmjopen.bmj.com>).

If you have any questions on BMJ Open's open peer review process please email [info.bmjopen@bmj.com](mailto:info.bmjopen@bmj.com)

# BMJ Open

## Delineating the long-term trajectories of social and occupational functioning of young people attending primary-care based, early intervention mental health services

|                                 |                                                                                                                                                                                                                                                                                                                                                                                                                                                                                                                                                                                                                                  |
|---------------------------------|----------------------------------------------------------------------------------------------------------------------------------------------------------------------------------------------------------------------------------------------------------------------------------------------------------------------------------------------------------------------------------------------------------------------------------------------------------------------------------------------------------------------------------------------------------------------------------------------------------------------------------|
| Journal:                        | <i>BMJ Open</i>                                                                                                                                                                                                                                                                                                                                                                                                                                                                                                                                                                                                                  |
| Manuscript ID                   | bmjopen-2017-020678                                                                                                                                                                                                                                                                                                                                                                                                                                                                                                                                                                                                              |
| Article Type:                   | Research                                                                                                                                                                                                                                                                                                                                                                                                                                                                                                                                                                                                                         |
| Date Submitted by the Author:   | 16-Nov-2017                                                                                                                                                                                                                                                                                                                                                                                                                                                                                                                                                                                                                      |
| Complete List of Authors:       | Iorfino, Frank; The University of Sydney, Brain and Mind Centre<br>Hermens, Daniel; The University of Sydney, Brain and Mind Centre<br>Cross, Shane; The University of Sydney, Brain and Mind Centre<br>Zmicerevska, Natalia; The University of Sydney, Brain and Mind Centre<br>Nichles, Alissa; The University of Sydney, Brain and Mind Centre<br>Badcock, Caro-Anne; The University of Sydney, Statistical Consulting<br>Groot, Josine; The University of Sydney, Brain and Mind Centre<br>Scott, Elizabeth; The University of Sydney, Brain and Mind Centre<br>Hickie, Ian; The University of Sydney, Brain and Mind Centre |
| <b>Primary Subject Heading</b>: | Mental health                                                                                                                                                                                                                                                                                                                                                                                                                                                                                                                                                                                                                    |
| Secondary Subject Heading:      | Health services research                                                                                                                                                                                                                                                                                                                                                                                                                                                                                                                                                                                                         |
| Keywords:                       | MENTAL HEALTH, Health services, Longitudinal study, Young people, Functional impairment                                                                                                                                                                                                                                                                                                                                                                                                                                                                                                                                          |
|                                 |                                                                                                                                                                                                                                                                                                                                                                                                                                                                                                                                                                                                                                  |

SCHOLARONE™  
Manuscripts

1  
2  
3  
4  
5  
6  
7 **Delineating the long-term trajectories of social and occupational functioning of**  
8 **young people attending primary-care based, early intervention mental health**  
9 **services**  
10

11  
12  
13  
14 Frank Iorfino<sup>a</sup>, Daniel. F. Hermens<sup>a</sup>, Shane Cross<sup>a</sup>, Natalia Zmicerevska<sup>a</sup>, Alissa  
15 Nichles<sup>a</sup>, Caro-Anne Badcock<sup>b</sup>, Josine Groot<sup>a</sup>, Elizabeth Scott<sup>a</sup>, & Ian. B. Hickie<sup>a</sup>  
16  
17

18  
19  
20  
21 <sup>a</sup> Youth Mental Health Team, Brain and Mind Centre, University of Sydney, Sydney,  
22 Australia.  
23

24 <sup>b</sup> Statistical Consulting, University of Sydney, Sydney, Australia.  
25  
26  
27  
28  
29  
30

31 **Corresponding author:** Frank Iorfino, 94 Mallet Street Camperdown NSW 2050,  
32 [frank.iorfino@sydney.edu.au](mailto:frank.iorfino@sydney.edu.au), 9351 0827  
33  
34

35  
36 **Word count:** 3156  
37  
38  
39  
40  
41  
42  
43  
44  
45  
46  
47  
48  
49  
50  
51  
52  
53  
54  
55  
56  
57  
58  
59  
60

## ABSTRACT

**Objectives:** Mental disorders typically emerge during adolescence and young adulthood and put young people at risk for prolonged socio-economic difficulties. This study describes the longitudinal course of social and occupational functioning of young people attending primary-care based, early intervention services.

**Design:** A longitudinal study of young people receiving mental healthcare.

**Setting:** Data were collected between January 2005 and August 2017 from a designated primary-care based mental health service.

**Participants:** 554 young people (54% female) aged 12 to 32 years.

**Measures:** A systematic medical file audit collected clinical and functional information at predetermined time intervals (i.e. 3 months to 5+ years) using a clinical proforma. Group-based trajectory modelling (GBTM) was used to identify distinct trajectories of social and occupational functioning over time (median number of observations per person = 4; median follow up time = 23 months).

**Results:** Between first clinical contact and time last seen, 15% of young people had reliably deteriorated, 23% improved and 62% did not demonstrate substantive change in function. Of the whole cohort, 69% had SOFAS scores less than 70 at time last seen, indicative of ongoing and substantive impairment. GBTM identified six distinct functional trajectories whereby over 60% had moderate to serious functional impairment at entry and remained chronically impaired over time; 7% entered with serious impairment and deteriorated further; one quarter were mildly impaired at entry and functionally recovered; and only a small minority (4%) presented with serious impairments and functionally improved over time. Not being in education, employment or training, previous hospitalisation and a younger age at baseline emerged as significant predictors of these functional trajectories.

**Conclusion:** Young people with emerging mental disorders have significant functional impairment at presentation for care, and for the majority, it persists over the course of clinical care. Despite the logic of providing clinical care earlier in the course of illness, these data suggest that more sophisticated and more intensive

individual-level and organisational strategies may be required to achieve significant and sustained functional improvements.

**Key words:** Mental health; longitudinal study; functional impairment; young people; health services

### Strengths and limitations of this study

- This study is one of the first to report on the long-term functional outcomes for young people attending primary-care based, early intervention mental health services. It highlights that while improvement is likely to occur throughout the course of care, the rate of clinical impairment and functional deterioration remains high for a large number of people with 69% remaining below the clinical cut-off at time last seen.
- This study utilised a rich data set of 554 participants with between two and nine observations per person (median = 4; approximately 2200 data points) up to five years after initial presentation and applied a novel group-based trajectory modelling procedure to characterise the pattern of change in functional impairment over time. This procedure identified six distinct trajectories that differ in terms of the initial level of functional impairment at presentation and the course of functioning over a five year period.
- Although this study focuses on individuals who were continually engaged in clinical care and represents 18% of the total research register it provides valuable insight into the social and occupational functioning of young people over a long period of time. These results further our understanding of functional impairment in a cohort with common mental disorders and highlights the need for better health service and individual intervention strategies that monitor and target these outcomes.

## INTRODUCTION

Mental disorders consistently rank among the leading causes of death and disability worldwide<sup>1-3</sup>. These disorders typically emerge during adolescence and young adulthood and put these young people at risk for prolonged socio-economic difficulties over their lifetime, even when their mental ill health subsides or is at sub-threshold levels<sup>4-7</sup>. There are major direct healthcare costs attributed to diagnosis and treatment, however it is their indirect costs linked to income loss through mortality, disability and regular absences from education or work that impact future income potential and have substantial global economic consequences<sup>8 9</sup>. The significant overlap between these disorders, economic inactivity and functional impairment reiterates the need to recognise and address the common health and economic vulnerabilities of these young people<sup>10</sup>.

The long-term outcomes for most major mental disorders often include high rates of recurrence, and slow or incomplete functional recovery, even among those who may have symptomatically remitted<sup>11-14</sup>. Long term follow up studies among older adults indicate that functional impairment often persists with most people experiencing some degree of disability during the majority of the long term follow up period<sup>15</sup>, while it is common for those within a primary care setting to spend up to one-third of the long term follow up period off work<sup>16</sup>. Similar patterns are evident among young people, since most medical and psychological treatments developed to address depression do not consistently improve functioning<sup>17-19</sup>. Of the few studies that report long-term functional outcomes for young people, most adolescents treated for depression experienced positive functional outcomes up to three years later, however persistent functional impairment was common for those with comorbidity and recurrence of depression<sup>20</sup>.

Early intervention services and models of care have been designed to respond to the early phases of these disorders, their associated comorbidities and impairment, to prevent or delay the progression of illness and reduce the burden for those at-risk<sup>21-23</sup>. Although many young people present with sub-threshold syndromes, they frequently report significant functional impairment (i.e. reduced functioning in social, occupational or other areas of daily life) and a high rate of disengagement

1  
2  
3 from education, employment or training (NEET)<sup>21 24-26</sup>. Over time, functional  
4 impairment tends to be associated with symptom remission, however the overall  
5 level of impairment and rate of disengagement remains high compared to the  
6 community<sup>27-29</sup>. This is particularly the case for those with more severe  
7 presentations who, despite receiving more intensive initial interventions, are  
8 unlikely to functionally recover in relatively short-term care environments<sup>30</sup>. While  
9 the first 12 months of care are characterised by significant changes in functional  
10 impairment<sup>31</sup>, the long-term patterns of functional impairment among young people  
11 engaged in primary mental health care remains largely unknown.  
12  
13  
14  
15  
16  
17  
18  
19

20 Understanding the changes in social and occupational functioning over time in real-  
21 world clinical cohorts is crucial for guiding the development mental health service  
22 provisions that meet the individual needs of young people with emerging mental  
23 disorders. This study examines the longitudinal course of social and occupational  
24 functioning for a cohort of young people after their initial presentation to a primary  
25 mental health care service. We report on the overall rate of change in social and  
26 occupational functioning, and aim to determine whether there are distinct long-term  
27 trajectories (via modeling) of functioning over the course of care.  
28  
29  
30  
31  
32  
33  
34

## 35 **METHODS**

### 36 **Participants**

37  
38 Study participants were drawn from a larger cohort of young people (n=3087; 59%  
39 female, mean age = 18.52 ± 3.8) presenting to youth mental health clinics in the  
40 Sydney area who were recruited to a case register for mood, psychotic,  
41 developmental and other mental disorders between January 2005 and August 2017  
42 <sup>26</sup>. Individuals were included in the present study if they met the following inclusion  
43 criteria: (i) between 12 and 32 years of age at the time of initial assessment; and (ii)  
44 were seen by a clinician on at least two separate occasions. Exclusion criteria for all  
45 potential participants were: medical instability or lack of capacity to give informed  
46 consent (as determined by a psychiatrist), history of neurological disease (e.g. tumor,  
47 head trauma, epilepsy), medical illness known to impact cognitive and brain function  
48 (e.g. cancer, ECT in last 3 months), and/or clinically evident intellectual disability  
49  
50  
51  
52  
53  
54  
55  
56  
57  
58  
59  
60

1  
2  
3 and/or insufficient English to participate in the research protocol. The study was  
4 approved by the University of Sydney Human Research Ethics Committee.  
5  
6  
7

### 8 **Data collection process**

9  
10 All participants received clinician-based case management and relevant psychosocial  
11 and/or medical interventions over the duration of their time in care. Trained  
12 research psychologists and medical officers conducted a medical file audit to collect  
13 demographic, clinical and functional information at predetermined time intervals  
14 using a clinical proforma (see details below). The first available clinical assessment at  
15 the service was taken as the baseline time point for each participant and the date of  
16 this assessment was used to determine each of the follow up time points: 3 months, 6  
17 months, 12 months, 2 years, 3 years, 4 years, and 5 years. If no clinical notes were  
18 available within +/- 1 month of the 3 and 6 month time points, or +/- 3 months of the  
19 yearly time points then this particular entry was left missing. A 'time last seen' entry  
20 was also used to capture final clinical information that did not align with one of the  
21 specified time points to ensure that every participant had data entered for the total  
22 time they were engaged with the clinical service. When data was available for a  
23 specified time point, all clinical notes from the preceding proforma entry, up to and  
24 including the current proforma entry were used to complete the proforma.  
25  
26  
27  
28  
29  
30  
31  
32  
33  
34  
35

### 36 **Clinical proforma**

37  
38 The clinical proforma captures key clinical information about the current episode  
39 and specific illness course characteristics, and an earlier version has been used in  
40 previous studies<sup>21 26</sup>. The proforma collects information about; (i) basic  
41 demographics (age, gender, receipt of government benefits); (ii) mental health  
42 diagnoses (based on DSM-V criteria); (iii) clinical course information  
43 (hospitalisations, childhood diagnoses); (iv) comorbidities (physical health  
44 diagnoses and suicidal thoughts and behaviours); and (v) functioning (assessed using  
45 the Social Occupational Functional Assessment Scale (SOFAS)<sup>32</sup> and engagement in  
46 part-time or fulltime education, employment or training, used to determine not in  
47 education, employment or training [NEET] status).  
48  
49  
50  
51  
52  
53  
54  
55

### 56 **Statistical analyses**



1  
2  
3 Statistical analyses were performed using SAS Software (SAS Institute). Overall  
4 changes in functioning (i.e. 'improvement', 'no change' and 'deterioration') between  
5 baseline and time last seen were determined using a Reliable Change Index (RCI)  
6 score of 10-points, and a clinically significant cut-off of equal to or above 69 was  
7 used<sup>29 31 33</sup>. To characterise the pattern of change in functional impairment over time  
8 we used group-based trajectory modelling (GBTM) using a procedure called PROC  
9 TRAJ (Nagin & Odgers, 2010). This method estimates multiple trajectory groups  
10 within the population and uses a maximum-likelihood method to calculate the  
11 probability of membership within each trajectory for each participant. We first fit the  
12 null model (one group model), and progressively increased the number of groups  
13 until we reached the optimal number of trajectory groups, which was determined  
14 using the Bayesian Information Criterion (BIC). A higher number (i.e. smaller  
15 negative number) indicates a better balance between model complexity and model  
16 fit. The shape of each trajectory was examined by modelling three parameters  
17 (linear, quadratic, cubic) and then, starting with the higher order polynomials,  
18 dropping non-significant parameters from the model. If all three parameters were  
19 not significant the linear parameter was retained. Finally, to explore which baseline  
20 factors were associated with each trajectory group, we used stepwise logistic  
21 regression, which included baseline demographic and clinical characteristics; age,  
22 gender, receipt of government benefits, NEET status, mental health diagnosis,  
23 medical diagnosis, childhood mental health diagnosis, hospitalised (ever), suicide  
24 ideation (ever), suicide planning (ever), and suicide attempts (ever). An  $\alpha$  level for  
25 entry and exclusion were set at  $P=0.15$  and based on the likelihood ratio statistic.  
26  
27  
28  
29  
30  
31  
32  
33  
34  
35  
36  
37  
38  
39  
40  
41

## 42 **RESULTS**

### 43 **Sample characteristics**

44 The sample consisted of 554 young people, 54% (297/554) were female and the  
45 mean age was 19.83 (SD = 3.77). At baseline, 20% (113/554) identified as NEET,  
46 17% (95/554) were currently receiving government benefits and the majority (78%;  
47 423/542) were in the clinical range of functional impairment (ie. SOFAS score < 69).  
48 The most common primary diagnosis was depression (43%; 237/548), followed by  
49 bipolar disorder (20%; 108/548), and then anxiety (18%; 99/548) with comorbid  
50 mental health problems identified in 79% (428/544) of participants. Physical health  
51  
52  
53  
54  
55  
56  
57  
58  
59  
60

1  
2  
3 comorbidities were reported in 26% (142/554) of participants, 23% (127/554) had  
4 previously been hospitalised due to a mental health problem, and 14% (75/554) had  
5 a mental health or behavioural diagnosis in childhood.  
6  
7

### 8 9 **Changes in functional impairment between baseline and time last seen**

10 The number of follow up time points recorded for an individual varied between 2  
11 and 9 (median = 4)(figure1) and the number of months between baseline and time  
12 last seen was between 1 and 126 (median = 23 months)(figure 2). The occurrence of  
13 time last seen was spread with 38% (208/554) occurring within the first 12 months  
14 after baseline and 62% (346/554) occurring more than one year after baseline.  
15 Overall, between baseline and time last seen, 15% (79/538) had reliably  
16 deteriorated, 23% (122/538) reliably improved and 62% (337/538) did not reliably  
17 change, while 69% (370/538) were below the clinical cut-off (SOFAS <69) at time  
18 last seen.  
19  
20  
21  
22  
23  
24  
25  
26  
27

### 28 **Identifying functional impairment trajectories**

29 GBTM identified that six distinct trajectories provided the best balance between  
30 model complexity and model fit for the data (table 1). The BIC continued to increase  
31 as the number of groups increased, however the BIC change from seven to nine  
32 trajectories were small and resulted in trajectory groups with very small sample  
33 sizes that did not add useful information beyond that provided by the six trajectories.  
34 Table 2 shows the model selection process for the shape of each of the six  
35 trajectories. We started with all three parameters in the model (linear, quadratic and  
36 cubic). The final model (model 4) had the highest BIC and contained quadratic  
37 parameters for trajectories 1, 3 and 5 and linear parameters for trajectories 2, 4, and  
38 6.  
39  
40  
41  
42  
43  
44  
45  
46  
47  
48  
49  
50  
51  
52  
53  
54  
55  
56  
57  
58  
59  
60

**Table 1.** Criteria for selecting the number of trajectories

| Number of groups | BIC      | Null model | BIC change |
|------------------|----------|------------|------------|
| 1                | -8773.03 | 0          | -          |
| 2                | -8372.01 | 1          | 401.022    |
| 3                | -8243.31 | 2          | 128.695    |
| 4                | -8215.51 | 3          | 27.802     |
| 5                | -8207.80 | 4          | 7.710      |
| 6                | -8166.46 | 5          | 41.339     |
| 7                | -8164.58 | 6          | 1.882      |
| 8                | -8162.05 | 7          | 2.528      |
| 9                | -8155.80 | 8          | 6.251      |

**Table 1 caption.** BIC = Bayesian Information Criterion. BIC change presents the changes in the BIC value as the number of trajectory group's increases. Large changes in BIC from 1 to 6 groups justified moving towards the more complex model, however changes in BIC from 7 to 9 groups were rather small and compromised the balance between complexity and fit. Six trajectory groups was deemed to be the most parsimonious model that provided the best balance between complexity and fit.

**Table 2.** Model selection for each functional impairment trajectory group.

| Trajectory Group                              | Parameter | Model 1            | Model 2            | Model 3            | Model 4            |
|-----------------------------------------------|-----------|--------------------|--------------------|--------------------|--------------------|
| 1<br>Serious<br>impairment –<br>deterioration | Intercept | 51.61208           | 51.77906           | 51.21822           | 50.92215           |
|                                               | Linear    | <b>-0.84458***</b> | <b>-0.86418***</b> | <b>-0.50281***</b> | <b>-0.49666***</b> |
|                                               | Quadratic | <b>0.02424**</b>   | <b>0.02483**</b>   | <b>0.00607**</b>   | <b>0.00599**</b>   |
|                                               | Cubic     | <b>-0.00022*</b>   | -0.00022           | .                  | .                  |
| 2<br>Serious<br>impairment -<br>chronic       | Intercept | 54.98897           | 54.95892           | 54.54367           | 54.75505           |
|                                               | Linear    | -0.19938           | -0.18538           | 0.02760            | -0.03218           |
|                                               | Quadratic | 0.00966            | 0.00901            | -0.00110           | .                  |
|                                               | Cubic     | <b>-0.00012*</b>   | -0.00012           | .                  | .                  |
| 3<br>Serious<br>impairment -<br>improvement   | Intercept | 41.08481           | 42.22558           | 42.03591           | 42.21444           |
|                                               | Linear    | <b>1.76596***</b>  | <b>1.26818***</b>  | <b>1.26797***</b>  | <b>1.25871***</b>  |
|                                               | Quadratic | <b>-0.03534*</b>   | <b>-0.01123***</b> | <b>-0.01116***</b> | <b>-0.01106***</b> |
|                                               | Cubic     | 0.00028            | .                  | .                  | .                  |
| 4<br>Moderate<br>impairment -<br>chronic      | Intercept | 61.20176           | 61.32354           | 61.52807           | 61.44346           |
|                                               | Linear    | 0.09497            | 0.04047            | 0.01924            | 0.02027            |
|                                               | Quadratic | -0.00309           | -0.00039           | .                  | .                  |
|                                               | Cubic     | 0.00003            | .                  | .                  | .                  |
| 5<br>Mild impairment<br>- improvement         | Intercept | 67.79146           | 68.08779           | 68.12046           | 68.11021           |
|                                               | Linear    | <b>0.46038***</b>  | <b>0.31975***</b>  | <b>0.32482***</b>  | <b>0.32399***</b>  |
|                                               | Quadratic | <b>-0.01202*</b>   | <b>-0.00468***</b> | <b>-0.00478***</b> | <b>-0.00477***</b> |
|                                               | Cubic     | 0.00009            | .                  | .                  | .                  |
| 6<br>Slight<br>impairment -<br>stable         | Intercept | 77.35888           | 77.40056           | 77.94966           | 77.93924           |
|                                               | Linear    | 0.19581            | 0.13170            | 0.04127            | 0.04153            |
|                                               | Quadratic | -0.00575           | -0.00168           | .                  | .                  |
|                                               | Cubic     | 0.00005            | .                  | .                  | .                  |
| <b>Model fit</b>                              | BIC       | -8166.462          | -8156.357          | -8148.227          | -8145.595          |

**Table 2 caption.** Parameter estimates are shown. Significant values are bolded. \*P<.05, \*\*P<.01, \*\*\*P<.001. The first model identified that the cubic parameters for trajectories 3, 4, 5 or 6 were not significant and were thus dropped for model 2. Model 2 identified that the quadratic parameters for trajectories 4 and 6 were not significant, and that the cubic parameter for trajectories 1 and 2 were not significant and were dropped for model 3. Model 3 identified that the quadratic parameter for trajectory 2 was not significant and was dropped for model 4. The final model (model 4) had the highest BIC and contained quadratic parameters for trajectories 1, 3 and 5 and linear parameters for trajectories 2, 4, and 6.

1  
2  
3 Figure 3 shows SOFAS score over a 5 year period for the six trajectories included in  
4 the final model (see supplementary figure 1 for individual-level trajectories for each  
5 group). Three trajectories start out with serious functional impairment at baseline  
6 but differ in the type of change in functioning over time. The first was the second  
7 largest group of the entire sample (29%; 158/554) and included individuals who  
8 followed a chronic course of serious functional impairment with little to no change in  
9 functioning over time ('serious impairment - chronic'). The second trajectory was  
10 quadratic and included individuals who significantly deteriorated in the first 12  
11 months before plateauing between 12 and 60 months ('serious impairment -  
12 deterioration'), while the third trajectory was also quadratic and included the small  
13 minority who improved significantly over the first 24 months to mild levels of  
14 functional impairment before slightly tapering off with mild to no functional  
15 impairment ('serious impairment - improvement'). By contrast, the remaining three  
16 trajectories each started out with moderate to mild levels of functional impairment.  
17 The first included the largest number of people across the entire sample (33%;  
18 185/554) who presented with moderate impairment and followed a chronic course  
19 of moderate impairment over time ('moderate impairment - chronic'). The second  
20 trajectory was quadratic and characterised by individuals who were mildly impaired  
21 at baseline, but improved/functionally recovered in the first 6 to 12 months before  
22 tapering off and remaining in the functional recovered population over time ('mild  
23 impairment - improvement'). The final trajectory group characterised the small  
24 number of individuals who were functioning well with no more than slight  
25 impairment at baseline and whose functioning was stable over time ('slight  
26 impairment - stable').  
27  
28  
29  
30  
31  
32  
33  
34  
35  
36  
37  
38  
39  
40  
41  
42  
43  
44

### 45 **Differentiating between functional impairment trajectories**

46 The aim of these analyses were to identify any demographic and clinical differences  
47 at baseline between the trajectory groups. The 'serious impairment - chronic'  
48 trajectory was chosen as the reference group because of the most impaired groups at  
49 entry, this group was the largest group and followed a stable/chronic trajectory over  
50 time. Of the demographic and clinical variables at baseline (table 3); NEET status, age  
51 and previous hospitalisations emerged as the factors that differentiated trajectory  
52 groups and were included in the reduced model. NEET status distinguished between  
53  
54  
55  
56  
57  
58  
59  
60

most trajectories, whereby those on the 'serious impairment - chronic' trajectory were less likely to be engaged in education, employment or training compared to 'moderate impairment - chronic' (OR = 0.47, 95% CI 0.27 - 0.83,  $p < 0.01$ ), 'mild impairment - improvement' (OR = 0.08, 95% CI 0.03 - 0.23,  $p < 0.001$ ) and 'slight impairment - stable' (OR = 0.09, 95% CI 0.01 - 0.70,  $p < 0.05$ ). Regarding age, those on the 'serious impairment - chronic' trajectory were: older than those on the 'serious impairment - improvement' trajectory (OR = 0.83, 95% CI 0.71 - 0.98,  $p < 0.05$ ), and younger than those on the 'mild impairment - improvement' trajectory (OR = 1.08, 95% CI 1.00 - 1.16,  $p < 0.05$ ). For previous hospitalisation, those on the 'serious impairment - chronic' trajectory were more likely to have been previously hospitalised than those on the 'mild impairment - improvement' trajectory (OR = 2.72, 95% CI 1.39 - 5.33,  $p < 0.01$ ).

**Table 3:** Baseline characteristics by functional impairment trajectory group (n=554)

|                                | Total sample | Serious impairment - deterioration | Serious impairment - chronic | Serious impairment - improvement | Moderate impairment - chronic | Mild impairment - improvement | Slight impairment - stable |
|--------------------------------|--------------|------------------------------------|------------------------------|----------------------------------|-------------------------------|-------------------------------|----------------------------|
| N (%)                          | 554 (100%)   | 39 (7%)                            | 158 (29%)                    | 19 (4%)                          | 185 (33%)                     | 129 (23%)                     | 24 (4%)                    |
| Age, mean (sd)                 | 19.83 (3.77) | 20.26 (4.05)                       | 19.68 (3.70)                 | 18.37 (4.76)                     | 19.75 (3.88)                  | 20.12 (3.35)                  | 20.29 (4.23)               |
| Female, n (%)                  | 297 (54%)    | 18 (49%)                           | 77 (52%)                     | 10 (56%)                         | 103 (60%)                     | 70 (58%)                      | 19 (83%)                   |
| NEET, n (%)                    | 113 (20%)    | 20 (51%)                           | 47 (30%)                     | 9 (47%)                          | 32 (17%)                      | 4 (3%)                        | 1 (4%)                     |
| Receiving gov. benefits, n (%) | 95 (17%)     | 16 (41%)                           | 35 (22%)                     | 4 (21%)                          | 27 (15%)                      | 11 (9%)                       | 2 (8%)                     |
| SOFAS score, mean (sd)         | 60.45 (9.19) | 50.61 (7.25)                       | 54.90 (5.63)                 | 43.83 (7.05)                     | 61.39 (5.24)                  | 68.06 (5.35)                  | 78.13 (7.56)               |
| Depression, n (%)              | 237 (43%)    | 14 (37%)                           | 70 (45%)                     | 10 (53%)                         | 72 (39%)                      | 59 (47%)                      | 12 (50%)                   |
| Anxiety, n (%)                 | 99           | 6 (16%)                            | 24 (15%)                     | 1 (5%)                           | 36 (20%)                      | 27 (21%)                      | 5 (21%)                    |

|                                  |           |          |          |          |          |          |         |
|----------------------------------|-----------|----------|----------|----------|----------|----------|---------|
| (%)                              | (18%)     |          |          |          |          |          |         |
| Bipolar, n (%)                   | 108 (20%) | 4 (11%)  | 31 (20%) | 3 (16%)  | 38 (21%) | 26 (21%) | 6 (25%) |
| Psychosis, n (%)                 | 34 (6%)   | 5 (13%)  | 10 (6%)  | 1 (5%)   | 14 (8%)  | 4 (3%)   | 0 (0%)  |
| Other, n (%)                     | 70 (13%)  | 9 (24%)  | 22 (14%) | 4 (21%)  | 23 (13%) | 11 (9%)  | 1 (4%)  |
| Has a medical diagnosis, n (%)   | 142 (26%) | 10 (26%) | 41 (26%) | 5 (26%)  | 51 (28%) | 28 (22%) | 7 (29%) |
| Had a childhood diagnosis, n (%) | 75 (14%)  | 8 (24%)  | 23 (17%) | 4 (22%)  | 21 (12%) | 18 (15%) | 1 (4%)  |
| Hospitalised (ever), n (%)       | 127 (23%) | 9 (27%)  | 48 (35%) | 7 (37%)  | 40 (23%) | 18 (16%) | 5 (24%) |
| Suicide ideation (ever), n (%)   | 258 (47%) | 15 (44%) | 76 (57%) | 10 (59%) | 89 (53%) | 59 (50%) | 9 (41%) |
| Suicide planning (ever), n (%)   | 94 (17%)  | 4 (12%)  | 38 (29%) | 5 (29%)  | 29 (18%) | 16 (14%) | 2 (10%) |
| Suicide attempts (ever), n (%)   | 91 (16%)  | 7 (20%)  | 36 (27%) | 5 (28%)  | 22 (13%) | 17 (15%) | 4 (18%) |

**Table 3 caption:** Column percentages are shown, except for the first row which shows the sample size for each trajectory group as a percentage of the total N. NEET, Not in Education, Employment or Training; SOFAS, Social and Occupational Functional Assessment Scale.

## DISCUSSION

Young people with emerging mental disorders have significant functional impairment that is dynamic and chronic over the course of clinical care. Improvement is likely to occur throughout the course of care, however the rate of clinical impairment and functional deterioration remains high for a large number of

1  
2  
3 people. The results also indicate that while individual trajectories may be highly  
4 variable, there are distinct patterns of social and occupational functioning that are  
5 differentiated by the level of functioning at entry and rate of change over the course  
6 of clinical care. Over 60% of the sample had moderate to serious functional  
7 impairment at entry and remained chronically impaired over time, a further 7%  
8 entered with serious impairment and deteriorated further, while approximately a  
9 quarter of the sample were mildly impaired at entry and were able to improve and  
10 functionally recover. Only a small minority (4%), the youngest of the trajectory  
11 groups, presented with serious impairments and were able to functionally improve  
12 over time. This may reflect the benefits of early intervention, however this requires  
13 further investigation. These distinct trajectories highlight the need for improving  
14 mental health service and individual intervention strategies to monitor and directly  
15 target these problems over the course of care to facilitate clinical, social and  
16 occupational recovery<sup>10</sup>.

17  
18  
19  
20  
21  
22  
23  
24  
25  
26  
27  
28 The overall rate of reliable change in this study was comparable to studies conducted  
29 in similar cohorts that were followed for relatively short-term occasions of service.  
30 The rate of reliable improvement in this study (23%) is consistent with a similar  
31 cohort of young people followed for approximately 6 months (25%)<sup>31</sup> and slightly  
32 lower than an Australian national study of young people attending *headspace*  
33 followed for approximately 3 months (31%)<sup>29</sup>. Interestingly, the rate of reliable  
34 deterioration in this study was consistent with the national study at approximately  
35 15%, which suggests that deterioration occurs early and often persists over longer  
36 periods. While the overall rate of change is important, this study examined the long  
37 term patterns of change, which were informed by multiple time points over a long-  
38 term period of care. This revealed that across all levels of impairment there were  
39 high rates of chronicity with many individuals remaining at similar levels of  
40 functioning over the course of care. For some who may have been on a path of  
41 deterioration prior to presentation for care, maintaining a consistent level of  
42 impairment may reflect a positive outcome whereby engagement with care stabilised  
43 their situation or prevented further deterioration or worsening. For others, however,  
44 not being able to return to work or education, or improve social functioning could be  
45 detrimental to their future health and socio-economic wellbeing and may reflect a



1  
2  
3 lack of sufficient integrated psychological and vocational interventions to directly  
4 address these outcomes<sup>34 35</sup>. Previous research has shown that only a small number  
5 of young people attending primary mental health services received specific  
6 vocational support in the previous year<sup>27</sup>, despite evidence to suggest that adjunctive  
7 interventions targeting vocational activity can have a positive impact on functional  
8 outcomes<sup>36 37</sup>. Together, this reiterates the need for early intervention and ongoing  
9 care that does more to directly address functional impairment over longer periods.  
10  
11  
12  
13  
14  
15

16 For health services and clinicians, determining when to adopt these intervention  
17 strategies and for whom, is critical. The general trajectories observed in this study  
18 are characterised by substantial individual variation from one time point to the next  
19 (see supplementary figure 1). This individual variability highlights the challenge  
20 health professionals often face when planning effective long-term interventions in a  
21 cohort with emerging mental health disorders. Being NEET, previous hospitalisation  
22 and a younger age at entry was associated with the serious impairment trajectories  
23 compared to the moderate, mild and slight impairment trajectories, however the  
24 long-term predictive utility of these characteristics is still limited. Though, through  
25 the development and integration of new and emerging technologies within health  
26 services, there is an increased capacity to track these outcomes in real-time  
27 through routine outcome measurement to deliver more personalised interventions  
28 that respond to an individual's needs<sup>38 39</sup>. Regular feedback to clinicians and  
29 individuals can provide important insights into the effectiveness of particular  
30 interventions for addressing key clinical and functional outcomes<sup>40</sup>. These  
31 approaches could also make use of assessments that aim to identify underlying  
32 characteristics, such as cognition, which have demonstrated some utility in  
33 predicting changes in functioning overtime<sup>41-43</sup>.  
34  
35  
36  
37  
38  
39  
40  
41  
42  
43  
44  
45  
46

47 This study has some limitations. The sample used for this study focuses on  
48 individuals who were continually engaged in clinical care, which means that the  
49 overall rate of improvement or deterioration among those who disengaged is  
50 unknown. Furthermore, the overall rate of improvement and deterioration in  
51 functioning at time last seen is imperfect given that many young people may be still  
52 engaged in care and so time last seen may not align with a complete period of care.  
53  
54  
55  
56  
57  
58  
59  
60

1  
2  
3 This is where the group-based trajectory modelling is beneficial over the overall rate  
4 of change, since it accounts for the overall trends to provide a clearer picture of  
5 change over time. While we know that this sample represents approximately 18% of  
6 the research register (554/3087), it is unclear what proportion of the whole  
7 population attending these services this sample represents. This was beyond the  
8 scope of this work but it is an important issue to be resolved in future studies,  
9 particularly given the patterns of functional impairment chronicity, to ensure current  
10 primary care service models are appropriate to address these issues. Finally, there  
11 may be other factors that account for these trajectories or differences in functional  
12 outcome, such as the type of interventions an individual received or treatment  
13 resistance. It is important for future work to determine the effectiveness of specific  
14 interventions on functional impairment trajectories and improving these outcomes.  
15  
16  
17  
18  
19  
20  
21  
22  
23  
24

25 This study provides valuable insights into the long-term functional trajectories of  
26 young people engaged in primary mental health care. The significant chronicity  
27 observed in this clinical cohort reiterates that ongoing functional impairment is  
28 prevalent among young people with emerging mental health disorders and should be  
29 a primary focus of intervention, in addition to symptomatic recovery/improvement.  
30 The substantial variability in individuals trajectories over time highlight the need for  
31 better health service and individual intervention strategies that monitor and target  
32 these outcomes so that early social and occupational impairment does not result in  
33 lifetime socio-economic burden.  
34  
35  
36  
37  
38  
39  
40  
41  
42  
43  
44  
45  
46  
47  
48  
49  
50  
51  
52  
53  
54  
55  
56  
57  
58  
59  
60

## ACKNOWLEDGEMENTS

We would like to thank all the young people who have participated in this study, and all the staff in the Youth Mental Health Team at the Brain and Mind Centre, past and present, who have contributed to this work.

## FUNDING

This study was supported by the National Health & Medical Research Council (NHMRC) Centre of Research Excellence grant (No. 1061043). Professor Ian Hickie is supported by the NHMRC Research fellowship (No. 1046899). Frank Iorfino is supported by an Australian Postgraduate Award (APA).

## COMPETING INTERESTS

All authors have completed the ICMJE uniform disclosure at [www.icmje.org/coi\\_disclosure.pdf](http://www.icmje.org/coi_disclosure.pdf) and declare: Professor Ian Hickie has been a Commissioner in Australia's National Mental Health Commission since 2012. He is the Co-Director, Health and Policy at the Brain and Mind Centre (BMC) University of Sydney. The BMC operates an early-intervention youth services at Camperdown under contract to headspace. Professor Hickie has previously led community-based and pharmaceutical industry-supported (Wyeth, Eli Lilly, Servier, Pfizer, AstraZeneca) projects focused on the identification and better management of anxiety and depression. He is a Board Member of Psychosis Australia Trust and a member of Veterans Mental Health Clinical Reference group. He was a member of the Medical Advisory Panel for Medibank Private until Oct 2017. He is the Chief Scientific Advisor to, and an equity shareholder in, Innowell. InnoWell has been formed by the University of Sydney and PwC to administer the \$30M Australian Government Funded Project Synergy. Project Synergy is a three year program for the transformation of mental health services through the use of innovative technologies. A/Prof Elizabeth Scott is the Medical Director, Young Adult Mental Health Unit, St Vincent's Hospital Darlinghurst, Discipline Leader of Adult Mental Health, School of Medicine, University of Notre Dame, Research Affiliate, The University of Sydney and Consultant Psychiatrist. She has received honoraria for educational seminars related to the clinical management of depressive disorders supported by Servier and Eli-Lilly

1  
2  
3 pharmaceuticals. She has participated in a national advisory board for the  
4 antidepressant compound Pristiq, manufactured by Pfizer. She was the National  
5 Coordinator of an antidepressant trial sponsored by Servier. All remaining authors  
6 declare no support from any organisation for the submitted work besides the  
7 acknowledged financial support; no financial relationships with any organisations  
8 that might have an interest in the submitted work in the previous three years; no  
9 other relationships or activities that could appear to have influenced the submitted  
10 work.  
11  
12  
13  
14  
15

### 16 17 18 **CONTRIBUTORSHIP STATEMENT**

19  
20 FI, DFH, SC and IBH designed the study, interpreted the results and drafted the  
21 manuscript. FI and CAB conducted the statistical analyses. FI, NZ, AN, JG and ES were  
22 involved in study coordination, data collection. All authors contributed to and have  
23 approved the final manuscript.  
24  
25  
26  
27

### 28 29 **DATA SHARING**

30  
31 No additional data available.  
32  
33

### 34 35 **TRANSPARENCY STATEMENT**

36  
37 The lead authors, affirm that this manuscript is an honest, accurate, and transparent  
38 account of the study being reported; that no important aspects of the study have  
39 been omitted; and that any discrepancies from the study as planned have been  
40 explained.  
41  
42  
43  
44  
45  
46  
47  
48  
49  
50  
51  
52  
53  
54  
55  
56  
57  
58  
59  
60

**REFERENCES**

1. Walker ER, McGee RE, Druss BG. Mortality in mental disorders and global disease burden implications: a systematic review and meta-analysis. *JAMA psychiatry* 2015;72(4):334-41.
2. Whiteford HA, Degenhardt L, Rehm J, et al. Global burden of disease attributable to mental and substance use disorders: findings from the Global Burden of Disease Study 2010. *The Lancet* 2013;382(9904):1575-86.
3. Vos T, Barber RM, Bell B, et al. Global, regional, and national incidence, prevalence, and years lived with disability for 301 acute and chronic diseases and injuries in 188 countries, 1990-2013: a systematic analysis for the Global Burden of Disease Study 2013. *The Lancet* 2015;386(9995):743.
4. Goodman A, Joyce R, Smith JP. The long shadow cast by childhood physical and mental problems on adult life. *Proceedings of the National Academy of Sciences* 2011;108(15):6032-37.
5. Merikangas K, He J-p, Burstein M, et al. Lifetime prevalence of mental disorders in US adolescents: results from the National Comorbidity Survey Replication-Adolescent Supplement (NCS-A). *Journal of the American Academy of Child & Adolescent Psychiatry* 2010;49(10):980-89.
6. Gibb SJ, Fergusson DM, Horwood LJ. Burden of psychiatric disorder in young adulthood and life outcomes at age 30. *The British Journal of Psychiatry* 2010;197(2):122-27.
7. Copeland WE, Wolke D, Shanahan L, et al. Adult functional outcomes of common childhood psychiatric problems: a prospective, longitudinal study. *JAMA psychiatry* 2015;72(9):892-99.

- 1  
2  
3 8. Trautmann S, Rehm J, Wittchen HU. The economic costs of mental disorders. *EMBO*  
4  
5 *reports* 2016:e201642951.  
6
- 7 9. Bloom D, Cafiero E, Jané-Llopis E, et al. The global economic burden of  
8  
9 noncommunicable diseases: Program on the Global Demography of Aging, 2012.  
10
- 11 10. Scott J, Fowler D, McGorry P, et al. Adolescents and young adults who are not in  
12  
13 employment, education, or training: British Medical Journal Publishing Group,  
14  
15 2013.  
16
- 17 11. Coryell W, Scheftner W, Keller M, et al. The enduring psychosocial consequences of  
18  
19 mania and depression. *The American journal of psychiatry* 1993  
20
- 21 12. Furukawa T, Takeuchi H, Hiroe T, et al. Symptomatic recovery and social functioning  
22  
23 in major depression. *Acta Psychiatrica Scandinavica* 2001;103(4):257-61.  
24
- 25 13. Kennedy N, Abbott R, Paykel E. Remission and recurrence of depression in the  
26  
27 maintenance era: long-term outcome in a Cambridge cohort. *Psychological*  
28  
29 *medicine* 2003;33(5):827-38.  
30
- 31 14. Riihimäki K, Vuorilehto M, Melartin T, et al. Five-year outcome of major depressive  
32  
33 disorder in primary health care. *Psychological medicine* 2014;44(7):1369-79.  
34
- 35 15. Judd LL, Schettler PJ, Solomon DA, et al. Psychosocial disability and work role  
36  
37 function compared across the long-term course of bipolar I, bipolar II and unipolar  
38  
39 major depressive disorders. *Journal of affective disorders* 2008;108(1):49-58.  
40
- 41 16. Riihimäki K, Vuorilehto M, Isometsä E. A 5-year prospective study of predictors for  
42  
43 functional and work disability among primary care patients with depressive  
44  
45 disorders. *European Psychiatry* 2015;30(1):51-57.  
46
- 47 17. Vitiello B, Rohde P, Silva S, et al. Functioning and quality of life in the Treatment for  
48  
49 Adolescents with Depression Study (TADS). *Journal of the American Academy of*  
50  
51 *Child & Adolescent Psychiatry* 2006;45(12):1419-26.  
52  
53  
54  
55  
56  
57  
58  
59

- 1  
2  
3 18. Wagner KD, Ambrosini P, Rynn M, et al. Efficacy of sertraline in the treatment of  
4  
5 children and adolescents with major depressive disorder: two randomized  
6  
7 controlled trials. *JAMA : the journal of the American Medical Association*  
8  
9 2003;290(8):1033-41. doi: 10.1001/jama.290.8.1033 [published Online First:  
10  
11 2003/08/28]  
12  
13  
14 19. Brent DA, Holder D, Kolko D, et al. A clinical psychotherapy trial for adolescent  
15  
16 depression comparing cognitive, family, and supportive therapy. *Archives of*  
17  
18 *general psychiatry* 1997;54(9):877-85.  
19  
20 20. Peters AT, Jacobs RH, Feldhaus C, et al. Trajectories of functioning into emerging  
21  
22 adulthood following treatment for adolescent depression. *Journal of Adolescent*  
23  
24 *Health* 2016;58(3):253-59.  
25  
26  
27 21. Hickie IB, Scott EM, Hermens DF, et al. Applying clinical staging to young people  
28  
29 who present for mental health care. *Early intervention in psychiatry* 2013;7(1):31-  
30  
31 43. doi: 10.1111/j.1751-7893.2012.00366.x [published Online First: 2012/06/08]  
32  
33  
34 22. McGorry PD, Hickie IB, Yung AR, et al. Clinical staging of psychiatric disorders: a  
35  
36 heuristic framework for choosing earlier, safer and more effective interventions.  
37  
38 *The Australian and New Zealand journal of psychiatry* 2006;40(8):616-22. doi:  
39  
40 10.1111/j.1440-1614.2006.01860.x [published Online First: 2006/07/27]  
41  
42  
43 23. McGorry P, Bates T, Birchwood M. Designing youth mental health services for the  
44  
45 21st century: examples from Australia, Ireland and the UK. *The British Journal of*  
46  
47 *Psychiatry* 2013;202(s54):s30-s35.  
48  
49 24. Scott J, Scott EM, Hermens DF, et al. Functional impairment in adolescents and young  
50  
51 adults with emerging mood disorders. *The British journal of psychiatry : the*  
52  
53 *journal of mental science* 2014;205(5):362-8. doi: 10.1192/bjp.bp.113.134262  
54  
55 [published Online First: 2014/09/13]  
56  
57  
58  
59

- 1  
2  
3 25. O'Dea B, Glozier N, Purcell R, et al. A cross-sectional exploration of the clinical  
4 characteristics of disengaged (NEET) young people in primary mental healthcare.  
5 *BMJ open* 2014;4(12):e006378.  
6  
7  
8  
9 26. Scott EM, Hermens DF, Glozier N, et al. Targeted primary care-based mental health  
10 services for young Australians. *Med J Aust* 2012;196(2):136-40.  
11  
12  
13 27. O'Dea B, Lee RS, McGorry PD, et al. A prospective cohort study of depression  
14 course, functional disability, and NEET status in help-seeking young adults. *Social*  
15 *psychiatry and psychiatric epidemiology* 2016;51(10):1395-404.  
16  
17  
18  
19 28. Judd LL, Akiskal HS, Zeller PJ, et al. Psychosocial disability during the long-term  
20 course of unipolar major depressive disorder. *Archives of general psychiatry*  
21 2000;57(4):375-80.  
22  
23  
24  
25 29. Rickwood DJ, Mazzer KR, Telford NR, et al. Changes in psychological distress and  
26 psychosocial functioning in young people visiting headspace centres for mental  
27 health problems. *The Medical Journal of Australia* 2015;202(10):537-42.  
28  
29  
30  
31  
32 30. Cross SP, Hermens DF, Hickie IB. Treatment patterns and short-term outcomes in an  
33 early intervention youth mental health service. *Early intervention in psychiatry*  
34 2016;10(1):88-97.  
35  
36  
37  
38 31. Cross SP, Scott J, Hermens DF, et al. Clinical outcomes for youth with subthreshold  
39 severe mental disorders accessing an early intervention service. *Psychiatric*  
40 *Services* (In press)  
41  
42  
43  
44  
45 32. Goldman HH, Skodol AE, Lave TR. Revising axis V for DSM-IV: a review of  
46 measures of social functioning. *Am J Psychiatry* 1992;149(9):1148-56.  
47  
48  
49  
50 33. Falkenström F. Does psychotherapy for young adults in routine practice show similar  
51 results as therapy in randomized clinical trials? *Psychotherapy Research*  
52 2010;20(2):181-92.  
53  
54  
55  
56  
57  
58  
59  
60



- 1  
2  
3 34. Power E, Clarke M, Kelleher I, et al. The association between economic inactivity and  
4  
5 mental health among young people: a longitudinal study of young adults who are  
6  
7 not in employment, education or training. *Irish journal of psychological medicine*  
8  
9 2015;32(1):155-60.  
10  
11 35. Rodwell L, Romaniuk H, Nilsen W, et al. Adolescent mental health and behavioural  
12  
13 predictors of being NEET: a prospective study of young adults not in employment,  
14  
15 education, or training. *Psychological Medicine* 2017:1-11.  
16  
17 36. Burns T, Catty J, Becker T, et al. The effectiveness of supported employment for  
18  
19 people with severe mental illness: a randomised controlled trial. *The Lancet*  
20  
21 2007;370(9593):1146-52.  
22  
23 37. Drake RE, McHugo GJ, Bebout RR, et al. A randomized clinical trial of supported  
24  
25 employment for inner-city patients with severe mental disorders. *Archives of*  
26  
27 *general psychiatry* 1999;56(7):627-33.  
28  
29 38. Boswell JF, Kraus DR, Miller SD, et al. Implementing routine outcome monitoring in  
30  
31 clinical practice: Benefits, challenges, and solutions. *Psychotherapy research*  
32  
33 2015;25(1):6-19.  
34  
35 39. Cross SP, Hickie I. Transdiagnostic stepped care in mental health. *Public health*  
36  
37 *research & practice* 2017;27(2)  
38  
39 40. Carlier IV, Meuldijk D, Van Vliet IM, et al. Routine outcome monitoring and  
40  
41 feedback on physical or mental health status: evidence and theory. *Journal of*  
42  
43 *Evaluation in Clinical Practice* 2012;18(1):104-10.  
44  
45 41. Lee R, Hermens D, Scott J, et al. A transdiagnostic study of education, employment,  
46  
47 and training outcomes in young people with mental illness. *Psychological*  
48  
49 *Medicine* 2017:1-10.  
50  
51  
52  
53  
54  
55  
56  
57  
58  
59  
60

- 1  
2  
3 42. Iorfino F, Hickie IB, Lee RS, et al. The underlying neurobiology of key functional  
4  
5 domains in young people with mood and anxiety disorders: a systematic review.  
6  
7 *BMC psychiatry* 2016;16(1):1.  
8  
9  
10 43. Lee R, Hermens DF, Redoblado-Hodge MA, et al. Neuropsychological and Socio-  
11  
12 Occupational Functioning in Young Psychiatric Outpatients: A Longitudinal  
13  
14 Investigation. *PloS one* 2013;8(3):e58176.  
15  
16  
17  
18  
19  
20  
21  
22  
23  
24  
25  
26  
27  
28  
29  
30  
31  
32  
33  
34  
35  
36  
37  
38  
39  
40  
41  
42  
43  
44  
45  
46  
47  
48  
49  
50  
51  
52  
53  
54  
55  
56  
57  
58  
59  
60

1  
2  
3  
4  
5  
6  
7  
8  
9  
10  
11  
12  
13  
14  
15  
16  
17  
18  
19  
20  
21  
22  
23  
24  
25  
26  
27  
28  
29  
30  
31  
32  
33  
34  
35  
36  
37  
38  
39  
40  
41  
42  
43  
44  
45  
46  
47  
48  
49  
50  
51  
52  
53  
54  
55  
56  
57  
58  
59  
60

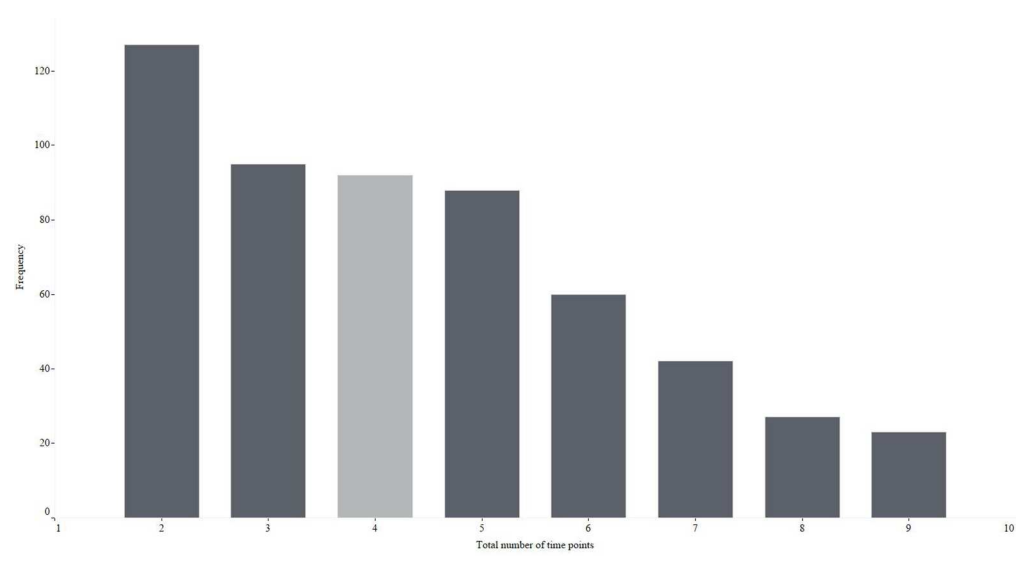

Figure 1 shows the frequency of the total number of time points recorded for each participant (median = 4; light grey bar).

129x69mm (300 x 300 DPI)

Review only

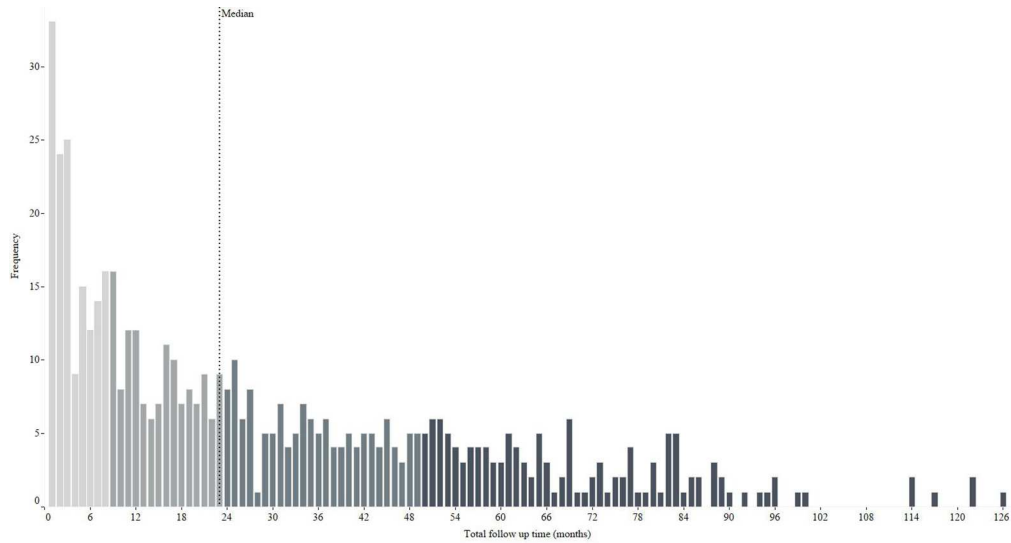

Figure 2 shows the distribution of the total follow up time for each participant in months. The bars have been shaded into quartiles (median = 23 months). The majority of participants (50%) were followed up between 9 months and 49 months (i.e. 4 years) after initial presentation, while 25% were followed up between 1 and 8 months, and the remaining 25% followed up between 50 months (i.e 4 years) and 126 months (i.e. 10 years).

129x69mm (300 x 300 DPI)

view only

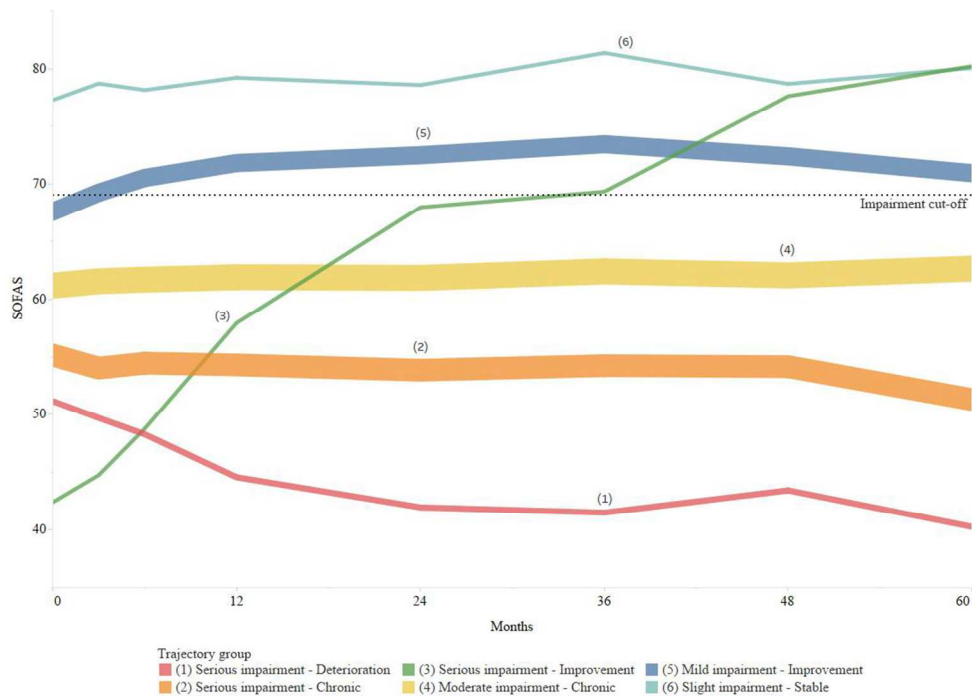

Figure 3 shows the six distinct trajectories identified for SOFAS score over a five year period. The thickness of each line represents the sample size of that particular trajectory, relative to all others. The dotted line represents the clinical impairment cut-off, which is set at a SOFAS score of 69. Slight impairment – stable (n=24, 4%), intercept equal to 78 and linear trend over time; Mild impairment – improvement (n=129, 23%), intercept equal to 68 and quadratic trend over time; Moderate impairment – chronic (n=185, 33%), intercept equal to 61 and linear trend over time; Serious impairment – chronic (n=158, 29%), intercept equal to 55 and linear trend over time; Serious impairment – improvement (n=19, 4%), intercept equal to 42 and quadratic trend over time; Serious impairment – deterioration (n=39, 7%), intercept equal to 51 and quadratic trend over time.

97x68mm (300 x 300 DPI)

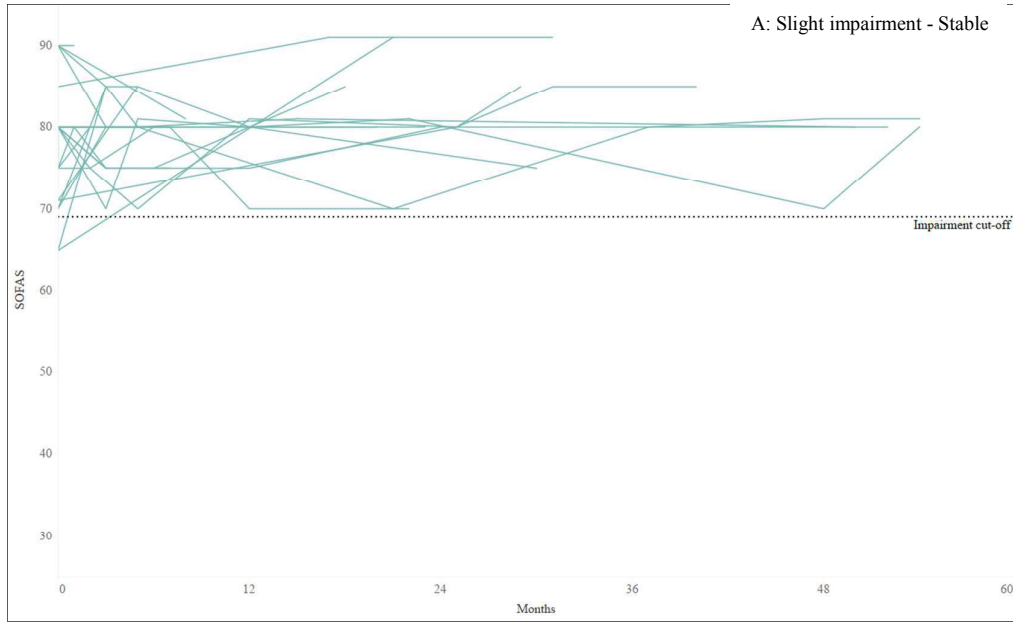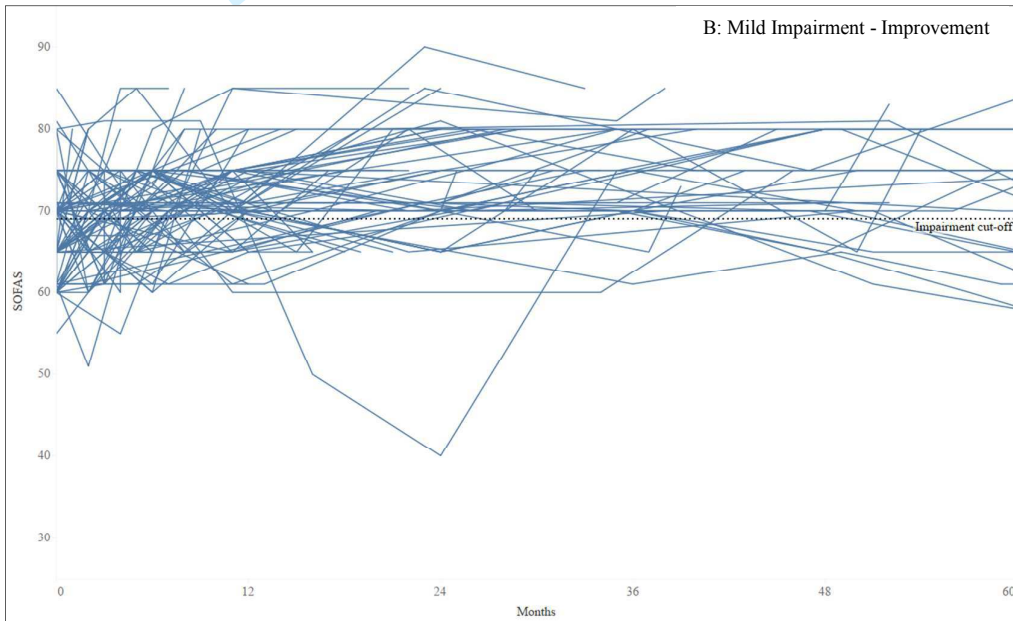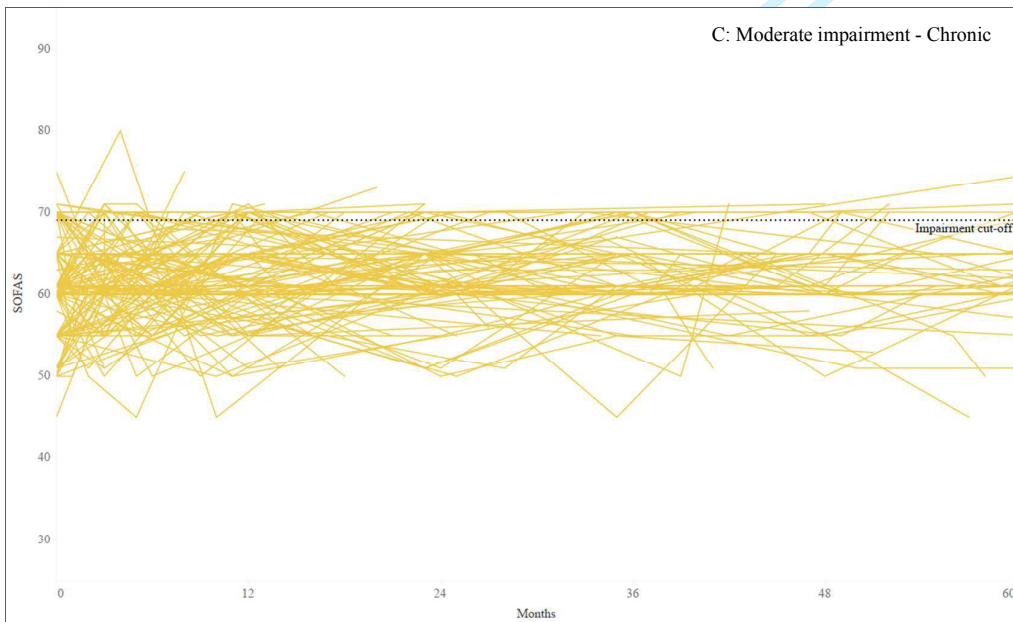

1  
2  
3  
4  
5  
6  
7  
8  
9  
10  
11  
12  
13  
14  
15  
16  
17  
18  
19  
20  
21  
22  
23  
24  
25  
26  
27  
28  
29  
30  
31  
32  
33  
34  
35  
36  
37  
38  
39  
40  
41  
42  
43  
44  
45  
46  
47  
48  
49  
50  
51  
52  
53  
54  
55  
56  
57  
58  
59  
60

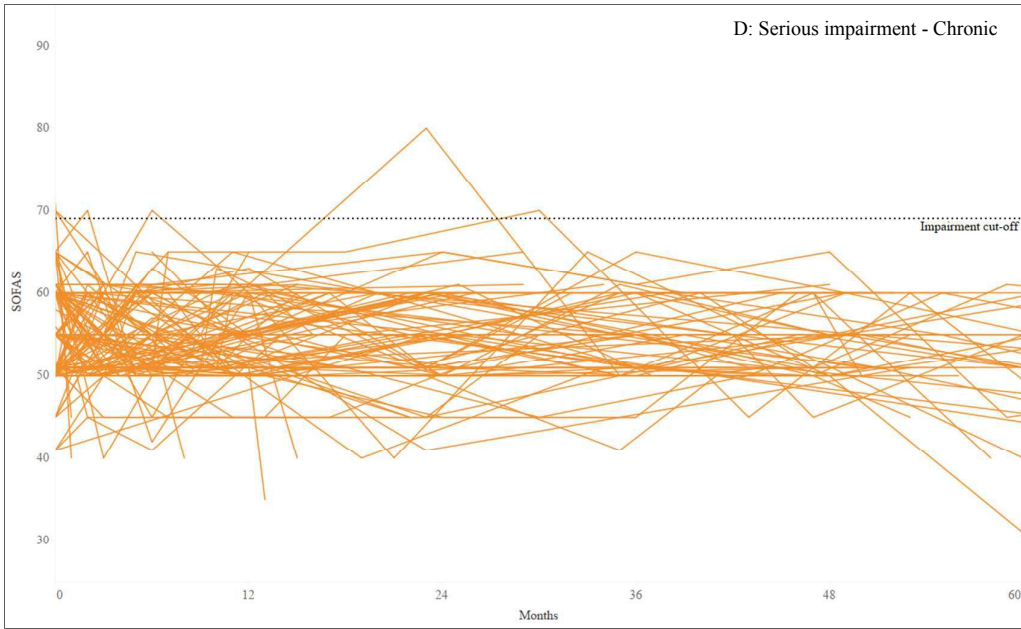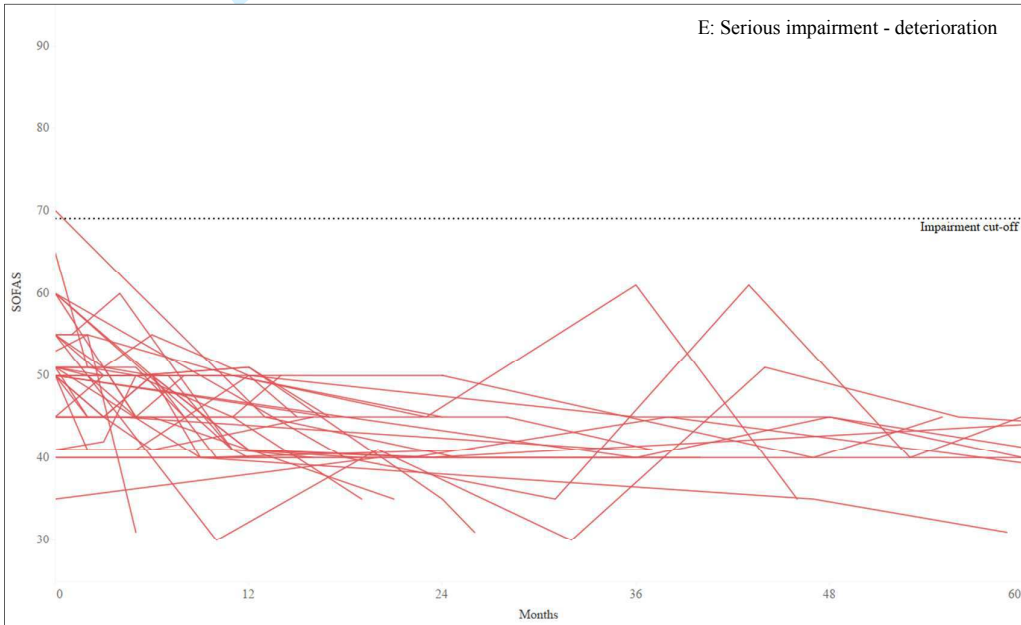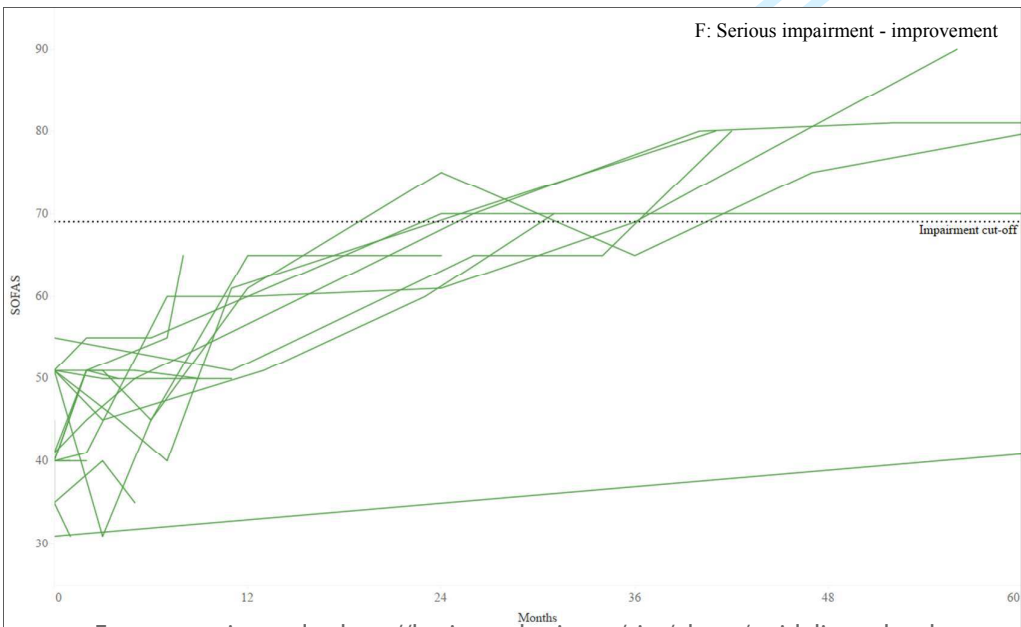

**Supplementary Figure 1 caption**

Supplementary figure 1 shows the individual-level trajectories for each group identified and shown in figure 1. Each line represents one individual and their SOFAS score ratings over time. The dotted line represents the clinical impairment cut-off, which is set at a SOFAS score of 69. Panel A: Slight impairment – stable (n=24, 4%), intercept equal to 78 and linear trend over time; Panel B: Mild impairment – improvement (n=129, 23%), intercept equal to 68 and quadratic trend over time; Panel C: Moderate impairment – chronic (n=185, 33%), intercept equal to 61 and linear trend over time; Panel D: Serious impairment – chronic (n=158, 29%), intercept equal to 55 and linear trend over time; Panel E: Serious impairment – improvement (n=19, 4%), intercept equal to 42 and quadratic trend over time; Panel F: Serious impairment – deterioration (n=39, 7%), intercept equal to 51 and quadratic trend over time.

For peer review only



STROBE Statement—Checklist of items that should be included in reports of *cohort studies*

|                              | Item No | Recommendation                                                                                                                                                                                    |            |
|------------------------------|---------|---------------------------------------------------------------------------------------------------------------------------------------------------------------------------------------------------|------------|
| <b>Title and abstract</b>    | 1       | (a) Indicate the study's design with a commonly used term in the title or the abstract                                                                                                            | P1         |
|                              |         | (b) Provide in the abstract an informative and balanced summary of what was done and what was found                                                                                               | P2         |
| <b>Introduction</b>          |         |                                                                                                                                                                                                   |            |
| Background/rationale         | 2       | Explain the scientific background and rationale for the investigation being reported                                                                                                              | P4-5       |
| Objectives                   | 3       | State specific objectives, including any prespecified hypotheses                                                                                                                                  | P5         |
| <b>Methods</b>               |         |                                                                                                                                                                                                   |            |
| Study design                 | 4       | Present key elements of study design early in the paper                                                                                                                                           | P5-6       |
| Setting                      | 5       | Describe the setting, locations, and relevant dates, including periods of recruitment, exposure, follow-up, and data collection                                                                   | P5         |
| Participants                 | 6       | (a) Give the eligibility criteria, and the sources and methods of selection of participants. Describe methods of follow-up                                                                        | P5         |
|                              |         | (b) For matched studies, give matching criteria and number of exposed and unexposed                                                                                                               | -          |
| Variables                    | 7       | Clearly define all outcomes, exposures, predictors, potential confounders, and effect modifiers. Give diagnostic criteria, if applicable                                                          | P5-7       |
| Data sources/<br>measurement | 8*      | For each variable of interest, give sources of data and details of methods of assessment (measurement). Describe comparability of assessment methods if there is more than one group              | P6         |
| Bias                         | 9       | Describe any efforts to address potential sources of bias                                                                                                                                         | -          |
| Study size                   | 10      | Explain how the study size was arrived at                                                                                                                                                         | -          |
| Quantitative<br>variables    | 11      | Explain how quantitative variables were handled in the analyses. If applicable, describe which groupings were chosen and why                                                                      | P7         |
| Statistical methods          | 12      | (a) Describe all statistical methods, including those used to control for confounding                                                                                                             | P7         |
|                              |         | (b) Describe any methods used to examine subgroups and interactions                                                                                                                               | P7         |
|                              |         | (c) Explain how missing data were addressed                                                                                                                                                       | P6-7       |
|                              |         | (d) If applicable, explain how loss to follow-up was addressed                                                                                                                                    |            |
|                              |         | (e) Describe any sensitivity analyses                                                                                                                                                             |            |
| <b>Results</b>               |         |                                                                                                                                                                                                   |            |
| Participants                 | 13*     | (a) Report numbers of individuals at each stage of study—eg numbers potentially eligible, examined for eligibility, confirmed eligible, included in the study, completing follow-up, and analysed | P7         |
|                              |         | (b) Give reasons for non-participation at each stage                                                                                                                                              | P6         |
|                              |         | (c) Consider use of a flow diagram                                                                                                                                                                |            |
| Descriptive data             | 14*     | (a) Give characteristics of study participants (eg demographic, clinical, social) and information on exposures and potential confounders                                                          | P7,8,12,13 |
|                              |         | (b) Indicate number of participants with missing data for each variable of interest                                                                                                               | P7-8       |
|                              |         | (c) Summarise follow-up time (eg, average and total amount)                                                                                                                                       | P8         |
| Outcome data                 | 15*     | Report numbers of outcome events or summary measures over time                                                                                                                                    | P8-13      |
| Main results                 | 16      | (a) Give unadjusted estimates and, if applicable, confounder-adjusted estimates and their precision (eg, 95% confidence interval). Make clear                                                     | P11-12     |

|                          |    |                                                                                                                                                                            |        |
|--------------------------|----|----------------------------------------------------------------------------------------------------------------------------------------------------------------------------|--------|
|                          |    | which confounders were adjusted for and why they were included                                                                                                             |        |
|                          |    | (b) Report category boundaries when continuous variables were categorized                                                                                                  | -      |
|                          |    | (c) If relevant, consider translating estimates of relative risk into absolute risk for a meaningful time period                                                           | -      |
| Other analyses           | 17 | Report other analyses done—eg analyses of subgroups and interactions, and sensitivity analyses                                                                             | P8-11  |
| <b>Discussion</b>        |    |                                                                                                                                                                            |        |
| Key results              | 18 | Summarise key results with reference to study objectives                                                                                                                   | P13-14 |
| Limitations              | 19 | Discuss limitations of the study, taking into account sources of potential bias or imprecision. Discuss both direction and magnitude of any potential bias                 | P15-16 |
| Interpretation           | 20 | Give a cautious overall interpretation of results considering objectives, limitations, multiplicity of analyses, results from similar studies, and other relevant evidence | P14-15 |
| Generalisability         | 21 | Discuss the generalisability (external validity) of the study results                                                                                                      | P14-16 |
| <b>Other information</b> |    |                                                                                                                                                                            |        |
| Funding                  | 22 | Give the source of funding and the role of the funders for the present study and, if applicable, for the original study on which the present article is based              | P17    |

\*Give information separately for exposed and unexposed groups.

**Note:** An Explanation and Elaboration article discusses each checklist item and gives methodological background and published examples of transparent reporting. The STROBE checklist is best used in conjunction with this article (freely available on the Web sites of PLoS Medicine at <http://www.plosmedicine.org/>, Annals of Internal Medicine at <http://www.annals.org/>, and Epidemiology at <http://www.epidem.com/>). Information on the STROBE Initiative is available at <http://www.strobe-statement.org>.

# BMJ Open

## **Delineating the trajectories of social and occupational functioning of young people attending primary-care based, early intervention mental health services: A longitudinal study**

|                                 |                                                                                                                                                                                                                                                                                                                                                                                                                                                                                                                                                                                                                                  |
|---------------------------------|----------------------------------------------------------------------------------------------------------------------------------------------------------------------------------------------------------------------------------------------------------------------------------------------------------------------------------------------------------------------------------------------------------------------------------------------------------------------------------------------------------------------------------------------------------------------------------------------------------------------------------|
| Journal:                        | <i>BMJ Open</i>                                                                                                                                                                                                                                                                                                                                                                                                                                                                                                                                                                                                                  |
| Manuscript ID                   | bmjopen-2017-020678.R1                                                                                                                                                                                                                                                                                                                                                                                                                                                                                                                                                                                                           |
| Article Type:                   | Research                                                                                                                                                                                                                                                                                                                                                                                                                                                                                                                                                                                                                         |
| Date Submitted by the Author:   | 18-Dec-2017                                                                                                                                                                                                                                                                                                                                                                                                                                                                                                                                                                                                                      |
| Complete List of Authors:       | Iorfino, Frank; The University of Sydney, Brain and Mind Centre<br>Hermens, Daniel; The University of Sydney, Brain and Mind Centre<br>Cross, Shane; The University of Sydney, Brain and Mind Centre<br>Zmicerevska, Natalia; The University of Sydney, Brain and Mind Centre<br>Nichles, Alissa; The University of Sydney, Brain and Mind Centre<br>Badcock, Caro-Anne; The University of Sydney, Statistical Consulting<br>Groot, Josine; The University of Sydney, Brain and Mind Centre<br>Scott, Elizabeth; The University of Sydney, Brain and Mind Centre<br>Hickie, Ian; The University of Sydney, Brain and Mind Centre |
| <b>Primary Subject Heading</b>: | Mental health                                                                                                                                                                                                                                                                                                                                                                                                                                                                                                                                                                                                                    |
| Secondary Subject Heading:      | Health services research                                                                                                                                                                                                                                                                                                                                                                                                                                                                                                                                                                                                         |
| Keywords:                       | MENTAL HEALTH, Health services, Longitudinal study, Young people, Functional impairment                                                                                                                                                                                                                                                                                                                                                                                                                                                                                                                                          |
|                                 |                                                                                                                                                                                                                                                                                                                                                                                                                                                                                                                                                                                                                                  |

SCHOLARONE™  
Manuscripts

1  
2  
3  
4  
5  
6  
7 **Delineating the trajectories of social and occupational functioning of young**  
8 **people attending primary-care based, early intervention mental health**  
9 **services: A longitudinal study**  
10

11  
12  
13  
14 Frank Iorfino<sup>a</sup>, Daniel. F. Hermens<sup>a</sup>, Shane Cross<sup>a</sup>, Natalia Zmicerevska<sup>a</sup>, Alissa  
15 Nichles<sup>a</sup>, Caro-Anne Badcock<sup>b</sup>, Josine Groot<sup>a</sup>, Elizabeth Scott<sup>a</sup>, & Ian. B. Hickie<sup>a</sup>  
16  
17

18  
19  
20  
21 <sup>a</sup> Youth Mental Health Team, Brain and Mind Centre, University of Sydney, Sydney,  
22 Australia.  
23

24 <sup>b</sup> Statistical Consulting, University of Sydney, Sydney, Australia.  
25  
26  
27  
28  
29  
30

31 **Corresponding author:** Frank Iorfino, 94 Mallet Street Camperdown NSW 2050,  
32 [frank.iorfino@sydney.edu.au](mailto:frank.iorfino@sydney.edu.au), 9351 0827  
33  
34

35  
36 **Word count:** 3572  
37  
38  
39  
40  
41  
42  
43  
44  
45  
46  
47  
48  
49  
50  
51  
52  
53  
54  
55  
56  
57  
58  
59  
60

## ABSTRACT

**Objectives:** Mental disorders typically emerge during adolescence and young adulthood and put young people at risk for prolonged socio-economic difficulties. This study describes the longitudinal course of social and occupational functioning of young people attending primary-care based, early intervention services.

**Design:** A longitudinal study of young people receiving mental healthcare.

**Setting:** Data were collected between January 2005 and August 2017 from a designated primary-care based mental health service.

**Participants:** 554 young people (54% female) aged 12 to 32 years.

**Measures:** A systematic medical file audit collected clinical and functional information at predetermined time intervals (i.e. 3 months to 5+ years) using a clinical proforma. Group-based trajectory modelling (GBTM) was used to identify distinct trajectories of social and occupational functioning over time (median number of observations per person = 4; median follow up time = 23 months).

**Results:** Between first clinical contact and time last seen, 15% of young people had reliably deteriorated, 23% improved and 62% did not demonstrate substantive change in function. Of the whole cohort, 69% had SOFAS scores less than 70 at time last seen, indicative of ongoing and substantive impairment. GBTM identified six distinct functional trajectories whereby over 60% had moderate to serious functional impairment at entry and remained chronically impaired over time; 7% entered with serious impairment and deteriorated further; one quarter were mildly impaired at entry and functionally recovered; and only a small minority (4%) presented with serious impairments and functionally improved over time. Not being in education, employment or training, previous hospitalisation and a younger age at baseline emerged as significant predictors of these functional trajectories.

**Conclusion:** Young people with emerging mental disorders have significant functional impairment at presentation for care, and for the majority, it persists over the course of clinical care. Despite the logic of providing clinical care earlier in the course of illness, these data suggest that more sophisticated and more intensive

individual-level and organisational strategies may be required to achieve significant and sustained functional improvements.

**Key words:** Mental health; longitudinal study; functional impairment; young people; health services

### Strengths and limitations of this study

- This study utilised a rich data set of 554 participants with between two and nine observations per person (median = 4; approximately 2200 data points) up to five years after initial presentation and applied a novel group-based trajectory modelling procedure to characterise the pattern of change in functional impairment over time. This procedure identified six distinct trajectories that differ in terms of the initial level of functional impairment at presentation and the course of functioning over a five year period.
- This study is one of the first to report on the long-term functional outcomes for young people attending primary-care based, early intervention mental health services. Its naturalistic design provides valuable insight into the extent of functional impairment over the course of these common mental disorders and identifies the specific needs of young people with these disorders. The study raises specific questions about how to improve health service and individual intervention strategies to monitor, target and improve these outcomes.
- Since this was a naturalistic cohort study, there may be some factors that account for the trajectories or differences in functional outcome that weren't collected in this study, such as socio-economic status, the type and intensity of interventions an individual received or treatment resistance. Since these factors were not uniformly collected it is difficult to make specific conclusions about the effect of specific intervention or service models on these trajectories or outcomes. This will be important for future studies to determine, however it was beyond the scope of this study.
- Since this study focuses on individuals who were continually engaged in clinical care and represents 18% of the total research register it is unclear how representative this sample is of the whole population presenting to these

1  
2  
3 services. Similarly, there is a lack of information about the differences between  
4 those who continually engage in care versus those who may have disengaged.  
5  
6  
7

## 8 9 **INTRODUCTION**

10 Mental disorders consistently rank among the leading causes of death and disability  
11 worldwide<sup>1-3</sup>. These disorders typically emerge during adolescence and young  
12 adulthood and put these young people at risk for prolonged socio-economic  
13 difficulties over their lifetime, even when their mental ill health subsides or is sub-  
14 threshold<sup>4-7</sup>. There are major direct healthcare costs attributed to diagnosis and  
15 treatment, however it is their indirect costs linked to income loss through mortality,  
16 disability and regular absences from education or work that impact future income  
17 potential and have substantial global economic consequences<sup>8 9</sup>. The significant  
18 overlap between these disorders, economic inactivity and functional impairment  
19 reiterates the need to recognise and address the common health and economic  
20 vulnerabilities of these young people<sup>10</sup>.  
21  
22  
23  
24  
25  
26  
27  
28  
29

30 The long-term outcomes for most major mental disorders often include high rates of  
31 recurrence, and slow or incomplete functional recovery, even among those who may  
32 have symptomatically remitted<sup>11-14</sup>. Long term follow up studies among older adults  
33 indicate that functional impairment often persists with most people experiencing  
34 some degree of disability during the majority of the long term follow up period<sup>15</sup>,  
35 while it is common for those within a primary care setting to spend up to one-third of  
36 the long term follow up period off work<sup>16</sup>. These patterns are also evident among  
37 young people, since most medical and psychological treatments developed to  
38 address depression do not consistently improve functioning in these populations<sup>17-19</sup>.  
39 Of the few studies that report long-term functional outcomes for young people, most  
40 adolescents treated for depression experienced positive functional outcomes up to  
41 three years later, however persistent functional impairment was common for those  
42 with comorbidity and recurrence of depression<sup>20</sup>. Similarly, young people with  
43 psychosis tend to experience significant social disability that persists over time and  
44 may be indicative of the difficulty of achieving functional recovery in these groups<sup>21</sup>.  
45 For many of these severe mental disorders, the onset of functional deterioration  
46  
47  
48  
49  
50  
51  
52  
53  
54  
55  
56  
57  
58  
59  
60

1  
2  
3 tends to occur prior to the onset of illness and suggests there is the capacity to  
4 address these problems early<sup>22 23</sup>.

5  
6  
7  
8 Early intervention services and models of care have been designed to respond to the  
9 early phases of these disorders, their associated comorbidities and impairment, to  
10 prevent or delay the progression of illness and reduce the burden for those at-risk <sup>24-</sup>  
11 <sup>26</sup>. Although many young people present with sub-threshold syndromes, they  
12 frequently report significant functional impairment (i.e. reduced functioning in  
13 social, occupational or other areas of daily life) and a high rate of disengagement  
14 from education, employment or training (NEET)<sup>24 27-29</sup>. Over time, functional  
15 impairment tends to be associated with symptom remission, however the overall  
16 level of impairment and rate of disengagement remains high compared to the  
17 community<sup>30-32</sup>. This is particularly the case for those with more severe  
18 presentations who, despite receiving more intensive initial interventions, are  
19 unlikely to functionally recover in relatively short-term care environments<sup>33</sup>. While  
20 the first 12 months of care are characterised by significant changes in functional  
21 impairment<sup>34</sup>, the long-term patterns of functional impairment among young people  
22 engaged in primary mental health care remains largely unknown.

23  
24  
25  
26  
27  
28  
29  
30  
31  
32  
33  
34  
35 Understanding the changes in social and occupational functioning over time in real-  
36 world clinical cohorts is crucial for guiding the development mental health service  
37 provisions that meet the individual needs of young people with emerging mental  
38 disorders. This study examines the longitudinal course of social and occupational  
39 functioning for a cohort of young people after their initial presentation to a primary  
40 mental health care service. We report on the overall rate of change in social and  
41 occupational functioning, and aim to determine whether there are distinct long-term  
42 trajectories (via modeling) of functioning over the course of care.

## 43 44 45 46 47 48 49 **METHODS**

### 50 51 **Participants**

52  
53 Study participants were drawn from a larger cohort of young people (n=3087; 59%  
54 female, mean age = 18.52 ± 3.8) presenting to the Brain and Mind Centre's youth  
55



1  
2  
3 mental health clinics in the Sydney suburbs of Camperdown and Campbelltown.  
4 These clinics consist of an integrated mix of primary-level services branded as  
5 *headspace*<sup>35</sup> as well as more specialised services including psychiatric services. These  
6 clinics primarily attract young people with a range of mental health problems,  
7 including those with sub-threshold and full threshold mental disorders, who may  
8 have been self-referred, referred via a family member or friend, or else via the  
9 community including external general practitioner, schools or university<sup>29</sup>. The  
10 young people in this study were recruited to a research register for mood, psychotic,  
11 developmental and other mental disorders between January 2005 and August 2017.  
12 All young people received clinician-based case management and relevant  
13 psychological, social and/or medical interventions over the duration of their time in  
14 care, which may also include referral to/from higher tier mental health services or  
15 hospitalisation for those whose needs exceed the capacity of the primary care  
16 services. Individuals were included in the present study if they met the following  
17 inclusion criteria: (i) between 12 and 32 years of age at the time of initial  
18 assessment; (ii) were seen by a clinician on at least two separate occasions. Exclusion  
19 criteria for all potential participants were: medical instability or lack of capacity to  
20 give informed consent (as determined by a psychiatrist), history of neurological  
21 disease (e.g. tumor, head trauma, epilepsy), medical illness known to impact  
22 cognitive and brain function (e.g. cancer, ECT in last 3 months), and/or clinically  
23 evident intellectual disability and/or insufficient English to participate in the  
24 research protocol. The study was approved by the University of Sydney Human  
25 Research Ethics Committee.

### 42 **Data collection process**

43 Trained research psychologists and medical officers conducted a medical file audit to  
44 collect demographic, clinical and functional information at predetermined time  
45 intervals using a clinical proforma (see details below). The first available clinical  
46 assessment at the service was taken as the baseline time point for each participant  
47 and the date of this assessment was used to determine each of the follow up time  
48 points: 3 months, 6 months, 12 months, 2 years, 3 years, 4 years, and 5 years. If no  
49 clinical notes were available within +/- 1 month of the 3 and 6 month time points, or  
50 +/- 3 months of the yearly time points then this particular entry was left missing. A  
51  
52  
53  
54  
55  
56  
57  
58  
59  
60

1  
2  
3 'time last seen' entry was also used to capture final clinical information that did not  
4 align with one of the specified time points to ensure that every participant had data  
5 entered for the total time they were engaged with the clinical service. When data was  
6 available for a specified time point, all clinical notes from the preceding proforma  
7 entry, up to and including the current proforma entry were used to complete the  
8 proforma.  
9  
10  
11  
12

### 13 14 15 **Clinical proforma**

16 The clinical proforma captures key clinical information about the current episode  
17 and specific illness course characteristics, and an earlier version has been used in  
18 previous studies<sup>24 29</sup>. The proforma collects information about; (i) basic  
19 demographics (age, gender, receipt of government benefits); (ii) mental health  
20 diagnoses (based on DSM-V criteria); (iii) clinical course information  
21 (hospitalisations, childhood diagnoses); (iv) comorbidities (physical health  
22 diagnoses, such as autoimmune, endocrine, metabolic etc., and suicidal thoughts and  
23 behaviours); and (v) functioning (assessed using the Social Occupational Functional  
24 Assessment Scale (SOFAS)<sup>36</sup> and engagement in part-time or fulltime education,  
25 employment or training, used to determine not in education, employment or training  
26 [NEET] status). The SOFAS is a clinician-rated measure that assesses functioning on a  
27 0–100 scale, with lower scores suggesting more severe impairment. The instructions  
28 emphasise that the rater should aim to avoid confounding the rating with clinical  
29 symptoms.  
30  
31  
32  
33  
34  
35  
36  
37  
38  
39  
40

### 41 42 **Statistical analyses**

43 Statistical analyses were performed using SAS Software (SAS Institute). Overall  
44 changes in functioning (i.e. 'improvement', 'no change' and 'deterioration') between  
45 baseline and time last seen were determined using a Reliable Change Index (RCI)  
46 score of 10-points, and a clinically significant cut-off of equal to or above 69 was  
47 used<sup>32 34 37</sup>. To characterise the pattern of change in functional impairment over time  
48 we used group-based trajectory modelling (GBTM) using a procedure called PROC  
49 TRAJ (Nagin & Odgers, 2010). This method estimates multiple trajectory groups  
50 within the population and uses a maximum-likelihood method to calculate the  
51 probability of membership within each trajectory for each participant. We first fit the  
52  
53  
54  
55  
56  
57  
58  
59  
60

1  
2  
3 null model (one group model), and progressively increased the number of groups  
4 until we reached the optimal number of trajectory groups, which was determined  
5 using the Bayesian Information Criterion (BIC). A higher number (i.e. smaller  
6 negative number) indicates a better balance between model complexity and model  
7 fit. The shape of each trajectory was examined by modelling three parameters  
8 (linear, quadratic, cubic) and then, starting with the higher order polynomials,  
9 dropping non-significant parameters from the model. If all three parameters were  
10 not significant the linear parameter was retained. Finally, to explore which baseline  
11 factors were associated with each trajectory group, we used stepwise logistic  
12 regression, which included baseline demographic and clinical characteristics; age,  
13 gender, receipt of government benefits, NEET status, mental health diagnosis,  
14 medical diagnosis, childhood mental health diagnosis, hospitalised (ever), suicide  
15 ideation (ever), suicide planning (ever), and suicide attempts (ever). An  $\alpha$  level for  
16 entry and exclusion were set at  $P=0.15$  and based on the likelihood ratio statistic.  
17  
18  
19  
20  
21  
22  
23  
24  
25  
26  
27

## 28 **RESULTS**

### 29 **Sample characteristics**

30  
31 The sample consisted of 554 young people, 54% (297/554) were female and the  
32 mean age was 19.83 (SD = 3.77). At baseline, 20% (113/554) identified as NEET,  
33 17% (95/554) were currently receiving government benefits and the majority (78%;  
34 423/542) were in the clinical range of functional impairment (ie. SOFAS score < 69).  
35 The most common primary diagnosis was depression (43%; 237/548), followed by  
36 bipolar disorder (20%; 108/548), and then anxiety (18%; 99/548) with comorbid  
37 mental health problems identified in 79% (428/544) of participants. Physical health  
38 comorbidities were reported in 26% (142/554) of participants, 23% (127/554) had  
39 previously been hospitalised due to a mental health problem, and 14% (75/554) had  
40 a mental health or behavioural diagnosis in childhood.  
41  
42  
43  
44  
45  
46  
47  
48

### 49 **Changes in functional impairment between baseline and time last seen**

50  
51 The number of follow up time points recorded for an individual varied between 2  
52 and 9 (median = 4)(figure1) and the number of months between baseline and time  
53 last seen was between 1 and 126 (median = 23 months)(figure 2). The occurrence of  
54 time last seen was spread with 38% (208/554) occurring within the first 12 months  
55  
56  
57  
58  
59  
60

1  
2  
3 after baseline and 62% (346/554) occurring more than one year after baseline.  
4 Overall, between baseline and time last seen, 15% (79/538) had reliably  
5 deteriorated, 23% (122/538) reliably improved and 62% (337/538) did not reliably  
6 change, while 69% (370/538) were below the clinical cut-off (SOFAS <69) at time  
7 last seen.  
8  
9  
10

### 11 12 13 **Identifying functional impairment trajectories**

14 GBTM identified that six distinct trajectories provided the best balance between  
15 model complexity and model fit for the data (table 1). The BIC continued to increase  
16 as the number of groups increased, however the BIC change from seven to nine  
17 trajectories were small and resulted in trajectory groups with very small sample  
18 sizes that did not add useful information beyond that provided by the six trajectories.  
19 Table 2 shows the model selection process for the shape of each of the six  
20 trajectories. We started with all three parameters in the model (linear, quadratic and  
21 cubic). The final model (model 4) had the highest BIC and contained quadratic  
22 parameters for trajectories 1, 3 and 5 and linear parameters for trajectories 2, 4, and  
23 6.  
24  
25  
26  
27  
28  
29  
30  
31  
32  
33  
34  
35  
36  
37  
38  
39  
40  
41  
42  
43  
44  
45  
46  
47  
48  
49  
50  
51  
52  
53  
54  
55  
56  
57  
58  
59  
60

**Table 1.** Criteria for selecting the number of trajectories

| Number of groups | BIC      | Null model | BIC change |
|------------------|----------|------------|------------|
| 1                | -8773.03 | 0          | -          |
| 2                | -8372.01 | 1          | 401.022    |
| 3                | -8243.31 | 2          | 128.695    |
| 4                | -8215.51 | 3          | 27.802     |
| 5                | -8207.80 | 4          | 7.710      |
| 6                | -8166.46 | 5          | 41.339     |
| 7                | -8164.58 | 6          | 1.882      |
| 8                | -8162.05 | 7          | 2.528      |
| 9                | -8155.80 | 8          | 6.251      |

**Table 1 caption.** BIC = Bayesian Information Criterion. BIC change presents the changes in the BIC value as the number of trajectory group's increases. Large changes in BIC from 1 to 6 groups justified moving towards the more complex model, however changes in BIC from 7 to 9 groups were rather small and compromised the balance between complexity and fit. Six trajectory groups was deemed to be the most parsimonious model that provided the best balance between complexity and fit.

**Table 2.** Model selection for each functional impairment trajectory group.

| Trajectory Group                        | Parameter | Model 1            | Model 2            | Model 3            | Model 4            |
|-----------------------------------------|-----------|--------------------|--------------------|--------------------|--------------------|
| 1<br>Serious impairment – deterioration | Intercept | 51.61208           | 51.77906           | 51.21822           | 50.92215           |
|                                         | Linear    | <b>-0.84458***</b> | <b>-0.86418***</b> | <b>-0.50281***</b> | <b>-0.49666***</b> |
|                                         | Quadratic | <b>0.02424**</b>   | <b>0.02483**</b>   | <b>0.00607**</b>   | <b>0.00599**</b>   |
|                                         | Cubic     | <b>-0.00022*</b>   | -0.00022           | .                  | .                  |
| 2<br>Serious impairment - chronic       | Intercept | 54.98897           | 54.95892           | 54.54367           | 54.75505           |
|                                         | Linear    | -0.19938           | -0.18538           | 0.02760            | -0.03218           |
|                                         | Quadratic | 0.00966            | 0.00901            | -0.00110           | .                  |
|                                         | Cubic     | <b>-0.00012*</b>   | -0.00012           | .                  | .                  |
| 3<br>Serious impairment - improvement   | Intercept | 41.08481           | 42.22558           | 42.03591           | 42.21444           |
|                                         | Linear    | <b>1.76596***</b>  | <b>1.26818***</b>  | <b>1.26797***</b>  | <b>1.25871***</b>  |
|                                         | Quadratic | <b>-0.03534*</b>   | <b>-0.01123***</b> | <b>-0.01116***</b> | <b>-0.01106***</b> |
|                                         | Cubic     | 0.00028            | .                  | .                  | .                  |
| 4<br>Moderate impairment - chronic      | Intercept | 61.20176           | 61.32354           | 61.52807           | 61.44346           |
|                                         | Linear    | 0.09497            | 0.04047            | 0.01924            | 0.02027            |
|                                         | Quadratic | -0.00309           | -0.00039           | .                  | .                  |
|                                         | Cubic     | 0.00003            | .                  | .                  | .                  |
| 5<br>Mild impairment - improvement      | Intercept | 67.79146           | 68.08779           | 68.12046           | 68.11021           |
|                                         | Linear    | <b>0.46038***</b>  | <b>0.31975***</b>  | <b>0.32482***</b>  | <b>0.32399***</b>  |
|                                         | Quadratic | <b>-0.01202*</b>   | <b>-0.00468***</b> | <b>-0.00478***</b> | <b>-0.00477***</b> |
|                                         | Cubic     | 0.00009            | .                  | .                  | .                  |
| 6<br>Slight impairment - stable         | Intercept | 77.35888           | 77.40056           | 77.94966           | 77.93924           |
|                                         | Linear    | 0.19581            | 0.13170            | 0.04127            | 0.04153            |
|                                         | Quadratic | -0.00575           | -0.00168           | .                  | .                  |
|                                         | Cubic     | 0.00005            | .                  | .                  | .                  |
| <b>Model fit</b>                        | BIC       | -8166.462          | -8156.357          | -8148.227          | -8145.595          |

**Table 2 caption.** Parameter estimates are shown. Significant values are bolded. \*P<.05, \*\*P<.01, \*\*\*P<.001. The first model identified that the cubic parameters for trajectories 3, 4, 5 or 6 were not significant and were thus dropped for model 2. Model 2 identified that the quadratic parameters for trajectories 4 and 6 were not significant, and that the cubic parameter for trajectories 1 and 2 were not significant and were dropped for model 3. Model 3 identified that the quadratic parameter for trajectory 2 was not significant and was dropped for model 4. The final model (model 4) had the highest BIC and contained quadratic parameters for trajectories 1, 3 and 5 and linear parameters for trajectories 2, 4, and 6.

1  
2  
3 Figure 3 shows SOFAS score over a 5 year period for the six trajectories included in  
4 the final model (see supplementary figure 1 for individual-level trajectories for each  
5 group). Three trajectories start out with serious functional impairment at baseline  
6 but differ in the type of change in functioning over time. The first was the second  
7 largest group of the entire sample (29%; 158/554) and included individuals who  
8 followed a chronic course of serious functional impairment with little to no change in  
9 functioning over time ('serious impairment - chronic'). The second trajectory was  
10 quadratic and included individuals who significantly deteriorated in the first 12  
11 months before plateauing between 12 and 60 months ('serious impairment -  
12 deterioration'), while the third trajectory was also quadratic and included the small  
13 minority who improved significantly over the first 24 months to mild levels of  
14 functional impairment before slightly tapering off with mild to no functional  
15 impairment ('serious impairment - improvement'). By contrast, the remaining three  
16 trajectories each started out with moderate to mild levels of functional impairment.  
17 The first included the largest number of people across the entire sample (33%;  
18 185/554) who presented with moderate impairment and followed a chronic course  
19 of moderate impairment over time ('moderate impairment - chronic'). The second  
20 trajectory was quadratic and characterised by individuals who were mildly impaired  
21 at baseline, but improved/functionally recovered in the first 6 to 12 months before  
22 tapering off and remaining in the functional recovered population over time ('mild  
23 impairment - improvement'). The final trajectory group characterised the small  
24 number of individuals who were functioning well with no more than slight  
25 impairment at baseline and whose functioning was stable over time ('slight  
26 impairment - stable').  
27  
28  
29  
30  
31  
32  
33  
34  
35  
36  
37  
38  
39  
40  
41  
42  
43

#### 44 **Differentiating between functional impairment trajectories**

45 The aim of these analyses were to identify any demographic and clinical differences  
46 at baseline between the trajectory groups. The 'serious impairment - chronic'  
47 trajectory was chosen as the reference group because of the most impaired groups at  
48 entry, this group was the largest group and followed a stable/chronic trajectory over  
49 time. Of the demographic and clinical variables at baseline (table 3); NEET status, age  
50 and previous hospitalisations emerged as the factors that differentiated trajectory  
51 groups and were included in the reduced model. NEET status distinguished between  
52  
53  
54  
55  
56  
57  
58  
59  
60

most trajectories, whereby those on the 'serious impairment - chronic' trajectory were less likely to be engaged in education, employment or training compared to 'moderate impairment - chronic' (OR = 0.47, 95% CI 0.27 - 0.83,  $p < 0.01$ ), 'mild impairment - improvement' (OR = 0.08, 95% CI 0.03 - 0.23,  $p < 0.001$ ) and 'slight impairment - stable' (OR = 0.09, 95% CI 0.01 - 0.70,  $p < 0.05$ ). Regarding age, those on the 'serious impairment - chronic' trajectory were: older than those on the 'serious impairment - improvement' trajectory (OR = 0.83, 95% CI 0.71 - 0.98,  $p < 0.05$ ), and younger than those on the 'mild impairment - improvement' trajectory (OR = 1.08, 95% CI 1.00 - 1.16,  $p < 0.05$ ). For previous hospitalisation, those on the 'serious impairment - chronic' trajectory were more likely to have been previously hospitalised than those on the 'mild impairment - improvement' trajectory (OR = 2.72, 95% CI 1.39 - 5.33,  $p < 0.01$ ).

**Table 3:** Baseline characteristics by functional impairment trajectory group (n=554)

|                                | Total sample | Serious impairment - deterioration | Serious impairment - chronic | Serious impairment - improvement | Moderate impairment - chronic | Mild impairment - improvement | Slight impairment - stable |
|--------------------------------|--------------|------------------------------------|------------------------------|----------------------------------|-------------------------------|-------------------------------|----------------------------|
| N (%)                          | 554 (100%)   | 39 (7%)                            | 158 (29%)                    | 19 (4%)                          | 185 (33%)                     | 129 (23%)                     | 24 (4%)                    |
| Age, mean (sd)                 | 19.83 (3.77) | 20.26 (4.05)                       | 19.68 (3.70)                 | 18.37 (4.76)                     | 19.75 (3.88)                  | 20.12 (3.35)                  | 20.29 (4.23)               |
| Female, n (%)                  | 297 (54%)    | 18 (49%)                           | 77 (52%)                     | 10 (56%)                         | 103 (60%)                     | 70 (58%)                      | 19 (83%)                   |
| NEET, n (%)                    | 113 (20%)    | 20 (51%)                           | 47 (30%)                     | 9 (47%)                          | 32 (17%)                      | 4 (3%)                        | 1 (4%)                     |
| Receiving gov. benefits, n (%) | 95 (17%)     | 16 (41%)                           | 35 (22%)                     | 4 (21%)                          | 27 (15%)                      | 11 (9%)                       | 2 (8%)                     |
| SOFAS score, mean (sd)         | 60.45 (9.19) | 50.61 (7.25)                       | 54.90 (5.63)                 | 43.83 (7.05)                     | 61.39 (5.24)                  | 68.06 (5.35)                  | 78.13 (7.56)               |
| Depression, n (%)              | 237 (43%)    | 14 (37%)                           | 70 (45%)                     | 10 (53%)                         | 72 (39%)                      | 59 (47%)                      | 12 (50%)                   |
| Anxiety, n (%)                 | 99           | 6 (16%)                            | 24 (15%)                     | 1 (5%)                           | 36 (20%)                      | 27 (21%)                      | 5 (21%)                    |



|                                  |           |          |          |          |          |          |         |
|----------------------------------|-----------|----------|----------|----------|----------|----------|---------|
| (%)                              | (18%)     |          |          |          |          |          |         |
| Bipolar, n (%)                   | 108 (20%) | 4 (11%)  | 31 (20%) | 3 (16%)  | 38 (21%) | 26 (21%) | 6 (25%) |
| Psychosis, n (%)                 | 34 (6%)   | 5 (13%)  | 10 (6%)  | 1 (5%)   | 14 (8%)  | 4 (3%)   | 0 (0%)  |
| Other, n (%)                     | 70 (13%)  | 9 (24%)  | 22 (14%) | 4 (21%)  | 23 (13%) | 11 (9%)  | 1 (4%)  |
| Has a medical diagnosis, n (%)   | 142 (26%) | 10 (26%) | 41 (26%) | 5 (26%)  | 51 (28%) | 28 (22%) | 7 (29%) |
| Had a childhood diagnosis, n (%) | 75 (14%)  | 8 (24%)  | 23 (17%) | 4 (22%)  | 21 (12%) | 18 (15%) | 1 (4%)  |
| Hospitalised (ever), n (%)       | 127 (23%) | 9 (27%)  | 48 (35%) | 7 (37%)  | 40 (23%) | 18 (16%) | 5 (24%) |
| Suicide ideation (ever), n (%)   | 258 (47%) | 15 (44%) | 76 (57%) | 10 (59%) | 89 (53%) | 59 (50%) | 9 (41%) |
| Suicide planning (ever), n (%)   | 94 (17%)  | 4 (12%)  | 38 (29%) | 5 (29%)  | 29 (18%) | 16 (14%) | 2 (10%) |
| Suicide attempts (ever), n (%)   | 91 (16%)  | 7 (20%)  | 36 (27%) | 5 (28%)  | 22 (13%) | 17 (15%) | 4 (18%) |

**Table 3 caption:** Column percentages are shown, except for the first row which shows the sample size for each trajectory group as a percentage of the total N. NEET, Not in Education, Employment or Training; SOFAS, Social and Occupational Functional Assessment Scale.

## DISCUSSION

Young people with emerging mental disorders have significant functional impairment that is dynamic and chronic over the course of clinical care. Improvement occurs throughout the course of care, however the rate of clinical impairment and functional deterioration remains high for a large number of people.

1  
2  
3 The results also indicate that while individual trajectories may be highly variable,  
4 there are distinct patterns of social and occupational functioning that are  
5 differentiated by the level of functioning at entry and rate of change over the course  
6 of clinical care. Over 60% of the sample had moderate to serious functional  
7 impairment at entry and remained chronically impaired over time, a further 7%  
8 entered with serious impairment and deteriorated further, while approximately a  
9 quarter of the sample were mildly impaired at entry and were able to improve and  
10 functionally recover. Only a small minority (4%), the youngest of the trajectory  
11 groups, presented with serious impairments and were able to functionally improve  
12 over time. This may reflect the benefits of early intervention, however this requires  
13 further investigation. These distinct trajectories highlight the need for improving  
14 mental health service and individual intervention strategies to monitor and directly  
15 target these problems over the course of care to facilitate clinical, social and  
16 occupational recovery<sup>10</sup>.

17  
18  
19  
20  
21  
22  
23  
24  
25  
26  
27  
28 The overall rate of reliable change in this study was comparable to studies conducted  
29 in similar cohorts that were followed for relatively short-term occasions of service.  
30 The rate of reliable improvement in this study (23%) is consistent with a similar  
31 cohort of young people followed for approximately 6 months (25%)<sup>34</sup> and slightly  
32 lower than an Australian national study of young people attending *headspace*  
33 followed for approximately 3 months (31%)<sup>32</sup>. Interestingly, the rate of reliable  
34 deterioration in this study was consistent with the national study at approximately  
35 15%, which suggests that deterioration occurs early and often persists over longer  
36 periods. While the overall rate of change is important, this study examined the longer  
37 term patterns of change (i.e. over a 5-year period), which were informed by multiple  
38 time points. This revealed that across all levels of impairment there were high rates  
39 of chronicity with many individuals remaining at similar levels of functioning over  
40 the course of care. For some who may have been on a path of deterioration prior to  
41 presentation for care, maintaining a consistent level of impairment may reflect a  
42 positive outcome whereby engagement with care stabilised their situation or  
43 prevented further deterioration or worsening. For others, however, not being able to  
44 return to work or education, or improve social functioning could be detrimental to  
45 their future health and socio-economic wellbeing and may reflect a lack of sufficient

1  
2  
3 integrated psychological and vocational interventions to directly address these  
4 outcomes<sup>38 39</sup>. These results suggest that for those who present with mild functional  
5 impairment, functional improvement is likely to occur relatively quickly (i.e. evident  
6 from the quadratic trend toward improvement within the first 6 months), however  
7 for those with more serious impairment there may be the need for more intensive  
8 strategies delivered over a longer period of time to prevent or address ongoing  
9 functional impairment. Previous research has shown that only a small number of  
10 young people attending these primary mental health services received specific  
11 vocational support in the previous year<sup>30</sup>, despite evidence to suggest that adjunctive  
12 interventions targeting vocational activity can have a positive impact on functional  
13 outcomes<sup>40 41</sup>. Even among those with severe, comorbid disorders, early intervention  
14 combined with focused social recovery has demonstrated clinical utility over early  
15 intervention alone for improving functional outcomes<sup>42</sup>. Together, this reiterates the  
16 need for early intervention and ongoing care that does more to directly address  
17 functional impairment over longer periods, particularly for those who present with  
18 substantial functional impairment.  
19  
20  
21  
22  
23  
24  
25  
26  
27  
28  
29  
30

31 For health services and clinicians, determining when to adopt these intervention  
32 strategies and for whom, is critical. The general trajectories observed in this study  
33 are characterised by substantial individual variation from one time point to the next  
34 (see supplementary figure 1). This individual variability highlights the challenge  
35 health professionals often face when planning effective long-term interventions in a  
36 cohort with emerging mental health disorders. Being NEET, previous hospitalisation  
37 and a younger age at entry was associated with the serious impairment trajectories  
38 compared to the moderate, mild and slight impairment trajectories, however the  
39 long-term predictive utility of these characteristics is still limited. Thus, there is a  
40 need to improve health service approaches to help clinicians identify and track  
41 individual functional outcomes and trajectories over the course of care, so that the  
42 appropriate interventions can be strategically implemented. One solution may be the  
43 development and integration of new and emerging technologies that use routine  
44 outcome measurement and feedback within health services, to deliver more  
45 personalised interventions that respond to an individual's needs<sup>43 44</sup>. Regular  
46 feedback to clinicians and individuals can provide important insights about  
47  
48  
49  
50  
51  
52  
53  
54  
55  
56  
57  
58  
59  
60

1  
2  
3 functional impairment overtime as well as the effectiveness of particular  
4 interventions for addressing key clinical and functional outcomes<sup>45</sup>. These  
5 approaches could also make use of assessments that aim to identify underlying  
6 characteristics, such as cognition, which have demonstrated some utility in  
7 predicting changes in functioning overtime<sup>46-48</sup>.  
8  
9  
10

11  
12  
13 This study has some limitations. The sample used for this study focuses on  
14 individuals who were continually engaged in clinical care, which means that the  
15 overall rate of improvement or deterioration among those who disengaged is  
16 unknown. Furthermore, the overall rate of improvement and deterioration in  
17 functioning at time last seen is imperfect given that many young people may be still  
18 engaged in care and so time last seen may not align with a complete period of care.  
19 This is where the group-based trajectory modelling is beneficial over the overall rate  
20 of change, since it accounts for the overall trends to provide a clearer picture of  
21 change over time. While we know that this sample represents approximately 18% of  
22 the research register (554/3087), it is unclear what proportion of the whole  
23 population attending these services this sample represents. Moreover, given that the  
24 study was conducted within the context of normal clinical service, the clinical and  
25 functional information available for particular individuals was diverse and while the  
26 option for “not enough information available” was provided to raters, it is unclear  
27 how the type of information available impacted on the completion of the clinical  
28 proforma. Finally, there may be other factors that account for these trajectories or  
29 differences in functional outcome that weren’t collected, such as, but not limited to,  
30 socio-economic status, the type and intensity of interventions an individual received  
31 or pre-existing undiagnosed learning or developmental disorders. It is important for  
32 future work to determine the effectiveness of specific interventions on functional  
33 impairment trajectories and improving these outcomes to determine the reliability  
34 and validity of the medical file audit process used in this study.  
35  
36  
37  
38  
39  
40  
41  
42  
43  
44  
45  
46  
47  
48  
49  
50

51 This study provides valuable insights into the long-term functional trajectories of  
52 young people engaged in primary mental health care. The significant chronicity  
53 observed in this clinical cohort reiterates that ongoing functional impairment is  
54  
55  
56  
57  
58  
59  
60

1  
2  
3 prevalent among young people with emerging mental health disorders and should be  
4 a primary focus of intervention, in addition to symptomatic improvement. The  
5 substantial variability in individuals trajectories over time highlight the need for  
6 better health service and individual intervention strategies that monitor and target  
7 these outcomes so that early social and occupational impairment does not result in  
8 lifetime socio-economic burden.  
9  
10  
11  
12  
13  
14  
15  
16  
17  
18  
19  
20  
21  
22  
23  
24  
25  
26  
27  
28  
29  
30  
31  
32  
33  
34  
35  
36  
37  
38  
39  
40  
41  
42  
43  
44  
45  
46  
47  
48  
49  
50  
51  
52  
53  
54  
55  
56  
57  
58  
59  
60

## ACKNOWLEDGEMENTS

We would like to thank all the young people who have participated in this study, and all the staff in the Youth Mental Health Team at the Brain and Mind Centre, past and present, who have contributed to this work.

## FUNDING

This study was supported by the National Health & Medical Research Council (NHMRC) Centre of Research Excellence grant (No. 1061043). Professor Ian Hickie is supported by the NHMRC Research fellowship (No. 1046899). Frank Iorfino is supported by an Australian Postgraduate Award (APA).

## COMPETING INTERESTS

All authors have completed the ICMJE uniform disclosure at [www.icmje.org/coi\\_disclosure.pdf](http://www.icmje.org/coi_disclosure.pdf) and declare: Professor Ian Hickie has been a Commissioner in Australia's National Mental Health Commission since 2012. He is the Co-Director, Health and Policy at the Brain and Mind Centre (BMC) University of Sydney. The BMC operates an early-intervention youth services at Camperdown under contract to headspace. Professor Hickie has previously led community-based and pharmaceutical industry-supported (Wyeth, Eli Lilly, Servier, Pfizer, AstraZeneca) projects focused on the identification and better management of anxiety and depression. He is a Board Member of Psychosis Australia Trust and a member of Veterans Mental Health Clinical Reference group. He was a member of the Medical Advisory Panel for Medibank Private until Oct 2017. He is the Chief Scientific Advisor to, and an equity shareholder in, Innowell. InnoWell has been formed by the University of Sydney and PwC to administer the \$30M Australian Government Funded Project Synergy. Project Synergy is a three year program for the transformation of mental health services through the use of innovative technologies. A/Prof Elizabeth Scott is the Medical Director, Young Adult Mental Health Unit, St Vincent's Hospital Darlinghurst, Discipline Leader of Adult Mental Health, School of Medicine, University of Notre Dame, Research Affiliate, The University of Sydney and Consultant Psychiatrist. She has received honoraria for educational seminars related to the clinical management of depressive disorders supported by Servier and Eli-Lilly

1  
2  
3 pharmaceuticals. She has participated in a national advisory board for the  
4 antidepressant compound Pristiq, manufactured by Pfizer. She was the National  
5 Coordinator of an antidepressant trial sponsored by Servier. All remaining authors  
6 declare no support from any organisation for the submitted work besides the  
7 acknowledged financial support; no financial relationships with any organisations  
8 that might have an interest in the submitted work in the previous three years; no  
9 other relationships or activities that could appear to have influenced the submitted  
10 work.  
11  
12  
13  
14  
15

### 16 17 18 **CONTRIBUTORSHIP STATEMENT**

19  
20 FI, DFH, SC and IBH designed the study, interpreted the results and drafted the  
21 manuscript. FI and CAB conducted the statistical analyses. FI, NZ, AN, JG and ES were  
22 involved in study coordination, data collection. All authors contributed to and have  
23 approved the final manuscript.  
24  
25  
26  
27

### 28 29 **DATA SHARING**

30  
31 No additional data available.  
32  
33

### 34 35 **TRANSPARENCY STATEMENT**

36  
37 The lead authors, affirm that this manuscript is an honest, accurate, and transparent  
38 account of the study being reported; that no important aspects of the study have  
39 been omitted; and that any discrepancies from the study as planned have been  
40 explained.  
41  
42  
43  
44  
45  
46  
47  
48  
49  
50  
51  
52  
53  
54  
55  
56  
57  
58  
59  
60

**REFERENCES**

1. Walker ER, McGee RE, Druss BG. Mortality in mental disorders and global disease burden implications: a systematic review and meta-analysis. *JAMA psychiatry* 2015;72(4):334-41.
2. Whiteford HA, Degenhardt L, Rehm J, et al. Global burden of disease attributable to mental and substance use disorders: findings from the Global Burden of Disease Study 2010. *The Lancet* 2013;382(9904):1575-86.
3. Vos T, Barber RM, Bell B, et al. Global, regional, and national incidence, prevalence, and years lived with disability for 301 acute and chronic diseases and injuries in 188 countries, 1990-2013: a systematic analysis for the Global Burden of Disease Study 2013. *The Lancet* 2015;386(9995):743.
4. Goodman A, Joyce R, Smith JP. The long shadow cast by childhood physical and mental problems on adult life. *Proceedings of the National Academy of Sciences* 2011;108(15):6032-37.
5. Merikangas K, He J-p, Burstein M, et al. Lifetime prevalence of mental disorders in US adolescents: results from the National Comorbidity Survey Replication-Adolescent Supplement (NCS-A). *Journal of the American Academy of Child & Adolescent Psychiatry* 2010;49(10):980-89.
6. Gibb SJ, Fergusson DM, Horwood LJ. Burden of psychiatric disorder in young adulthood and life outcomes at age 30. *The British Journal of Psychiatry* 2010;197(2):122-27.
7. Copeland WE, Wolke D, Shanahan L, et al. Adult functional outcomes of common childhood psychiatric problems: a prospective, longitudinal study. *JAMA psychiatry* 2015;72(9):892-99.



- 1  
2  
3 8. Trautmann S, Rehm J, Wittchen HU. The economic costs of mental disorders. *EMBO*  
4  
5 *reports* 2016:e201642951.  
6
- 7 9. Bloom D, Cafiero E, Jané-Llopis E, et al. The global economic burden of  
8  
9 noncommunicable diseases: Program on the Global Demography of Aging, 2012.  
10
- 11 10. Scott J, Fowler D, McGorry P, et al. Adolescents and young adults who are not in  
12  
13 employment, education, or training: British Medical Journal Publishing Group,  
14  
15 2013.  
16
- 17 11. Coryell W, Scheftner W, Keller M, et al. The enduring psychosocial consequences of  
18  
19 mania and depression. *The American journal of psychiatry* 1993  
20
- 21 12. Furukawa T, Takeuchi H, Hiroe T, et al. Symptomatic recovery and social functioning  
22  
23 in major depression. *Acta Psychiatrica Scandinavica* 2001;103(4):257-61.  
24
- 25 13. Kennedy N, Abbott R, Paykel E. Remission and recurrence of depression in the  
26  
27 maintenance era: long-term outcome in a Cambridge cohort. *Psychological*  
28  
29 *medicine* 2003;33(5):827-38.  
30
- 31 14. Riihimäki K, Vuorilehto M, Melartin T, et al. Five-year outcome of major depressive  
32  
33 disorder in primary health care. *Psychological medicine* 2014;44(7):1369-79.  
34
- 35 15. Judd LL, Schettler PJ, Solomon DA, et al. Psychosocial disability and work role  
36  
37 function compared across the long-term course of bipolar I, bipolar II and unipolar  
38  
39 major depressive disorders. *Journal of affective disorders* 2008;108(1):49-58.  
40
- 41 16. Riihimäki K, Vuorilehto M, Isometsä E. A 5-year prospective study of predictors for  
42  
43 functional and work disability among primary care patients with depressive  
44  
45 disorders. *European Psychiatry* 2015;30(1):51-57.  
46
- 47 17. Vitiello B, Rohde P, Silva S, et al. Functioning and quality of life in the Treatment for  
48  
49 Adolescents with Depression Study (TADS). *Journal of the American Academy of*  
50  
51 *Child & Adolescent Psychiatry* 2006;45(12):1419-26.  
52  
53  
54  
55  
56  
57  
58  
59

- 1  
2  
3 18. Wagner KD, Ambrosini P, Rynn M, et al. Efficacy of sertraline in the treatment of  
4  
5 children and adolescents with major depressive disorder: two randomized  
6  
7 controlled trials. *JAMA : the journal of the American Medical Association*  
8  
9 2003;290(8):1033-41. doi: 10.1001/jama.290.8.1033 [published Online First:  
10  
11 2003/08/28]  
12  
13  
14 19. Brent DA, Holder D, Kolko D, et al. A clinical psychotherapy trial for adolescent  
15  
16 depression comparing cognitive, family, and supportive therapy. *Archives of*  
17  
18 *general psychiatry* 1997;54(9):877-85.  
19  
20 20. Peters AT, Jacobs RH, Feldhaus C, et al. Trajectories of functioning into emerging  
21  
22 adulthood following treatment for adolescent depression. *Journal of Adolescent*  
23  
24 *Health* 2016;58(3):253-59.  
25  
26  
27 21. Hodgekins J, Birchwood M, Christopher R, et al. Investigating trajectories of social  
28  
29 recovery in individuals with first-episode psychosis: a latent class growth analysis.  
30  
31 *The British Journal of Psychiatry* 2015;207(6):536-43.  
32  
33 22. Santesteban-Echarri O, Paino M, Rice S, et al. Predictors of functional recovery in  
34  
35 first-episode psychosis: A systematic review and meta-analysis of longitudinal  
36  
37 studies. *Clinical psychology review* 2017  
38  
39  
40 23. Fowler D, Hodgekins J, Painter M, et al. Cognitive behaviour therapy for improving  
41  
42 social recovery in psychosis: a report from the ISREP MRC Trial Platform Study  
43  
44 (Improving Social Recovery in Early Psychosis). *Psychol Med* 2009;39(10):1627-  
45  
46 36. doi: 10.1017/s0033291709005467 [published Online First: 2009/04/02]  
47  
48  
49 24. Hickie IB, Scott EM, Hermens DF, et al. Applying clinical staging to young people  
50  
51 who present for mental health care. *Early intervention in psychiatry* 2013;7(1):31-  
52  
53 43. doi: 10.1111/j.1751-7893.2012.00366.x [published Online First: 2012/06/08]  
54  
55  
56  
57  
58  
59

- 1  
2  
3 25. McGorry PD, Hickie IB, Yung AR, et al. Clinical staging of psychiatric disorders: a  
4  
5 heuristic framework for choosing earlier, safer and more effective interventions.  
6  
7 *The Australian and New Zealand journal of psychiatry* 2006;40(8):616-22. doi:  
8  
9 10.1111/j.1440-1614.2006.01860.x [published Online First: 2006/07/27]  
10  
11  
12 26. McGorry P, Bates T, Birchwood M. Designing youth mental health services for the  
13  
14 21st century: examples from Australia, Ireland and the UK. *The British Journal of*  
15  
16 *Psychiatry* 2013;202(s54):s30-s35.  
17  
18 27. Scott J, Scott EM, Hermens DF, et al. Functional impairment in adolescents and young  
19  
20 adults with emerging mood disorders. *The British journal of psychiatry : the*  
21  
22 *journal of mental science* 2014;205(5):362-8. doi: 10.1192/bjp.bp.113.134262  
23  
24 [published Online First: 2014/09/13]  
25  
26  
27 28. O'Dea B, Glozier N, Purcell R, et al. A cross-sectional exploration of the clinical  
28  
29 characteristics of disengaged (NEET) young people in primary mental healthcare.  
30  
31 *BMJ open* 2014;4(12):e006378.  
32  
33 29. Scott EM, Hermens DF, Glozier N, et al. Targeted primary care-based mental health  
34  
35 services for young Australians. *Med J Aust* 2012;196(2):136-40.  
36  
37  
38 30. O'Dea B, Lee RS, McGorry PD, et al. A prospective cohort study of depression  
39  
40 course, functional disability, and NEET status in help-seeking young adults. *Social*  
41  
42 *psychiatry and psychiatric epidemiology* 2016;51(10):1395-404.  
43  
44 31. Judd LL, Akiskal HS, Zeller PJ, et al. Psychosocial disability during the long-term  
45  
46 course of unipolar major depressive disorder. *Archives of general psychiatry*  
47  
48 2000;57(4):375-80.  
49  
50 32. Rickwood DJ, Mazzer KR, Telford NR, et al. Changes in psychological distress and  
51  
52 psychosocial functioning in young people visiting headspace centres for mental  
53  
54 health problems. *The Medical Journal of Australia* 2015;202(10):537-42.  
55  
56  
57  
58  
59  
60

- 1  
2  
3 33. Cross SP, Hermens DF, Hickie IB. Treatment patterns and short-term outcomes in an  
4  
5 early intervention youth mental health service. *Early intervention in psychiatry*  
6  
7 2016;10(1):88-97.  
8  
9 34. Cross SP, Scott J, Hermens DF, et al. Clinical outcomes for youth with subthreshold  
10  
11 severe mental disorders accessing an early intervention service. *Psychiatric*  
12  
13 *Services* (In press)  
14  
15 35. McGorry PD, Tanti C, Stokes R, et al. headspace: Australia's National Youth Mental  
16  
17 Health Foundation-where young minds come first. *Medical Journal of Australia*  
18  
19 2007;187(7):S68.  
20  
21 36. Goldman HH, Skodol AE, Lave TR. Revising axis V for DSM-IV: a review of  
22  
23 measures of social functioning. *Am J Psychiatry* 1992;149(9):1148-56.  
24  
25 37. Falkenström F. Does psychotherapy for young adults in routine practice show similar  
26  
27 results as therapy in randomized clinical trials? *Psychotherapy Research*  
28  
29 2010;20(2):181-92.  
30  
31 38. Power E, Clarke M, Kelleher I, et al. The association between economic inactivity and  
32  
33 mental health among young people: a longitudinal study of young adults who are  
34  
35 not in employment, education or training. *Irish journal of psychological medicine*  
36  
37 2015;32(1):155-60.  
38  
39 39. Rodwell L, Romaniuk H, Nilsen W, et al. Adolescent mental health and behavioural  
40  
41 predictors of being NEET: a prospective study of young adults not in employment,  
42  
43 education, or training. *Psychological Medicine* 2017:1-11.  
44  
45 40. Burns T, Catty J, Becker T, et al. The effectiveness of supported employment for  
46  
47 people with severe mental illness: a randomised controlled trial. *The Lancet*  
48  
49 2007;370(9593):1146-52.  
50  
51  
52  
53  
54  
55  
56  
57  
58  
59  
60

- 1  
2  
3 41. Drake RE, McHugo GJ, Bebout RR, et al. A randomized clinical trial of supported  
4 employment for inner-city patients with severe mental disorders. *Archives of*  
5 *general psychiatry* 1999;56(7):627-33.  
6  
7  
8  
9 42. Fowler D, Hodgekins J, French P, et al. Social recovery therapy in combination with  
10 early intervention services for enhancement of social recovery in patients with  
11 first-episode psychosis (SUPEREDEN3): a single-blind, randomised controlled  
12 trial. *The Lancet Psychiatry* doi: 10.1016/S2215-0366(17)30476-5  
13  
14  
15  
16  
17 43. Boswell JF, Kraus DR, Miller SD, et al. Implementing routine outcome monitoring in  
18 clinical practice: Benefits, challenges, and solutions. *Psychotherapy research*  
19 2015;25(1):6-19.  
20  
21  
22  
23 44. Cross SP, Hickie I. Transdiagnostic stepped care in mental health. *Public health*  
24 *research & practice* 2017;27(2)  
25  
26  
27  
28 45. Carlier IV, Meuldijk D, Van Vliet IM, et al. Routine outcome monitoring and  
29 feedback on physical or mental health status: evidence and theory. *Journal of*  
30 *Evaluation in Clinical Practice* 2012;18(1):104-10.  
31  
32  
33  
34 46. Lee R, Hermens D, Scott J, et al. A transdiagnostic study of education, employment,  
35 and training outcomes in young people with mental illness. *Psychological*  
36 *Medicine* 2017:1-10.  
37  
38  
39  
40 47. Iorfino F, Hickie IB, Lee RS, et al. The underlying neurobiology of key functional  
41 domains in young people with mood and anxiety disorders: a systematic review.  
42 *BMC psychiatry* 2016;16(1):1.  
43  
44  
45  
46  
47 48. Lee R, Hermens DF, Redoblado-Hodge MA, et al. Neuropsychological and Socio-  
48 Occupational Functioning in Young Psychiatric Outpatients: A Longitudinal  
49 Investigation. *PloS one* 2013;8(3):e58176.  
50  
51  
52  
53  
54  
55  
56  
57  
58  
59  
60

1  
2  
3  
4  
5  
6  
7  
8  
9  
10  
11  
12  
13  
14  
15  
16  
17  
18  
19  
20  
21  
22  
23  
24  
25  
26  
27  
28  
29  
30  
31  
32  
33  
34  
35  
36  
37  
38  
39  
40  
41  
42  
43  
44  
45  
46  
47  
48  
49  
50  
51  
52  
53  
54  
55  
56  
57  
58  
59  
60

For peer review only

1  
2  
3 Figure 1 shows the frequency of the total number of time points recorded for each  
4 participant (median = 4; light grey bar).  
5  
6  
7

8 Figure 2 shows the distribution of the total follow up time for each participant in  
9 months. The bars have been shaded into quartiles (median = 23 months). The  
10 majority of participants (50%) were followed up between 9 months and 49 months  
11 (i.e. 4 years) after initial presentation, while 25% were followed up between 1 and 8  
12 months, and the remaining 25% followed up between 50 months (i.e 4 years) and  
13 126 months (i.e. 10 years).  
14  
15  
16

17  
18 Figure 3 shows the six distinct trajectories identified for SOFAS score over a five year  
19 period. The thickness of each line represents the sample size of that particular  
20 trajectory, relative to all others. The dotted line represents the clinical impairment  
21 cut-off, which is set at a SOFAS score of 69. Slight impairment – stable (n=24, 4%),  
22 intercept equal to 78 and linear trend over time; Mild impairment – improvement  
23 (n=129, 23%), intercept equal to 68 and quadratic trend over time; Moderate  
24 impairment – chronic (n=185, 33%), intercept equal to 61 and linear trend over  
25 time; Serious impairment – chronic (n=158, 29%), intercept equal to 55 and linear  
26 trend over time; Serious impairment – improvement (n=19, 4%), intercept equal to  
27 42 and quadratic trend over time; Serious impairment – deterioration (n=39, 7%),  
28 intercept equal to 51 and quadratic trend over time.  
29  
30  
31  
32  
33  
34  
35  
36  
37  
38  
39  
40  
41  
42  
43  
44  
45  
46  
47  
48  
49  
50  
51  
52  
53  
54  
55  
56  
57  
58  
59  
60

1  
2  
3  
4  
5  
6  
7  
8  
9  
10  
11  
12  
13  
14  
15  
16  
17  
18  
19  
20  
21  
22  
23  
24  
25  
26  
27  
28  
29  
30  
31  
32  
33  
34  
35  
36  
37  
38  
39  
40  
41  
42  
43  
44  
45  
46  
47  
48  
49  
50  
51  
52  
53  
54  
55  
56  
57  
58  
59  
60



Figure 1 shows the frequency of the total number of time points recorded for each participant (median = 4; light grey bar).

129x69mm (300 x 300 DPI)

Review only



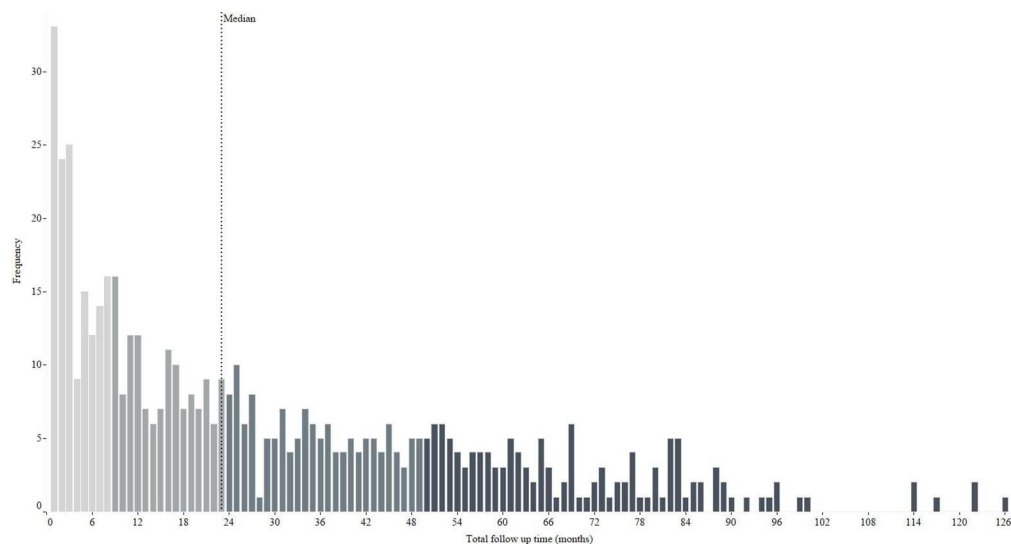

Figure 2 shows the distribution of the total follow up time for each participant in months. The bars have been shaded into quartiles (median = 23 months). The majority of participants (50%) were followed up between 9 months and 49 months (i.e. 4 years) after initial presentation, while 25% were followed up between 1 and 8 months, and the remaining 25% followed up between 50 months (i.e. 4 years) and 126 months (i.e. 10 years).

129x69mm (300 x 300 DPI)



Figure 3 shows the six distinct trajectories identified for SOFAS score over a five year period. The thickness of each line represents the sample size of that particular trajectory, relative to all others. The dotted line represents the clinical impairment cut-off, which is set at a SOFAS score of 69. Slight impairment – stable (n=24, 4%), intercept equal to 78 and linear trend over time; Mild impairment – improvement (n=129, 23%), intercept equal to 68 and quadratic trend over time; Moderate impairment – chronic (n=185, 33%), intercept equal to 61 and linear trend over time; Serious impairment – chronic (n=158, 29%), intercept equal to 55 and linear trend over time; Serious impairment – improvement (n=19, 4%), intercept equal to 42 and quadratic trend over time; Serious impairment – deterioration (n=39, 7%), intercept equal to 51 and quadratic trend over time.

97x68mm (300 x 300 DPI)

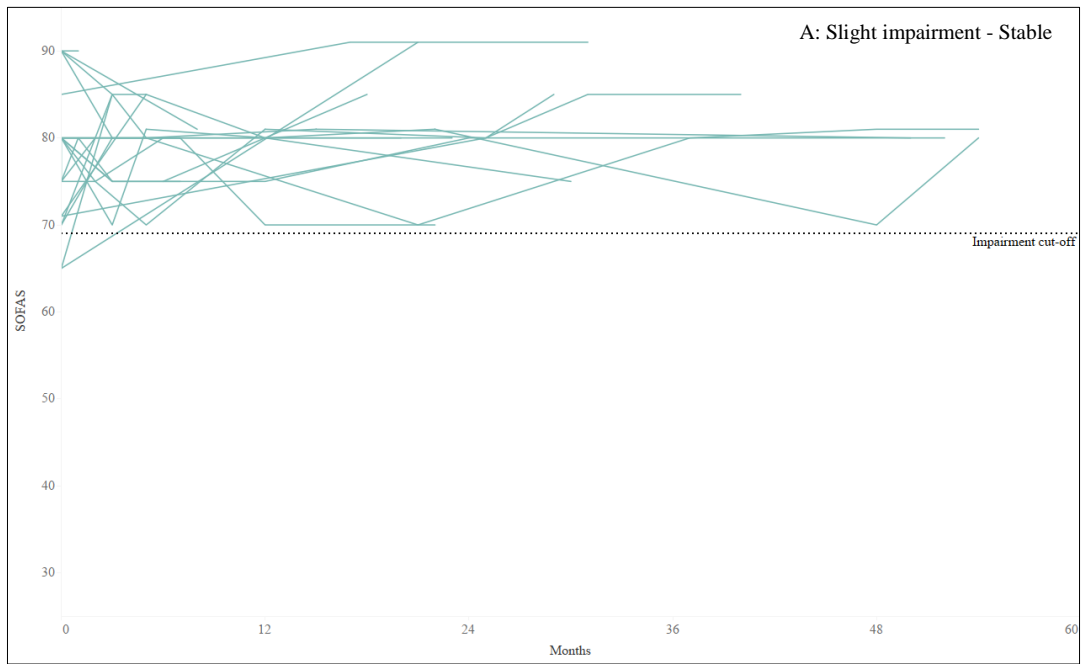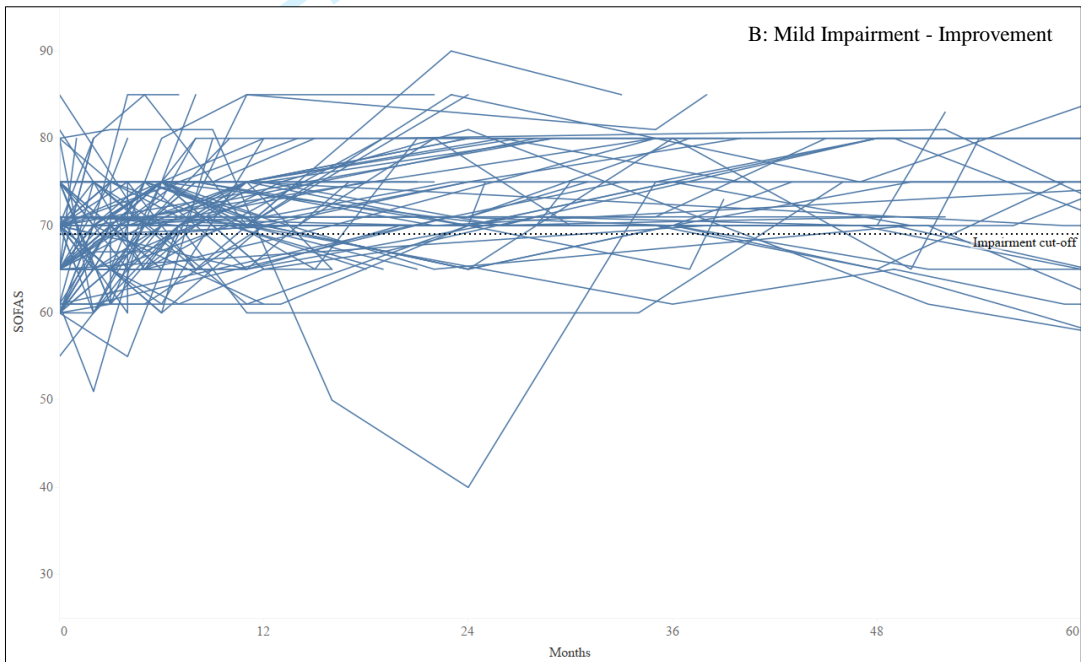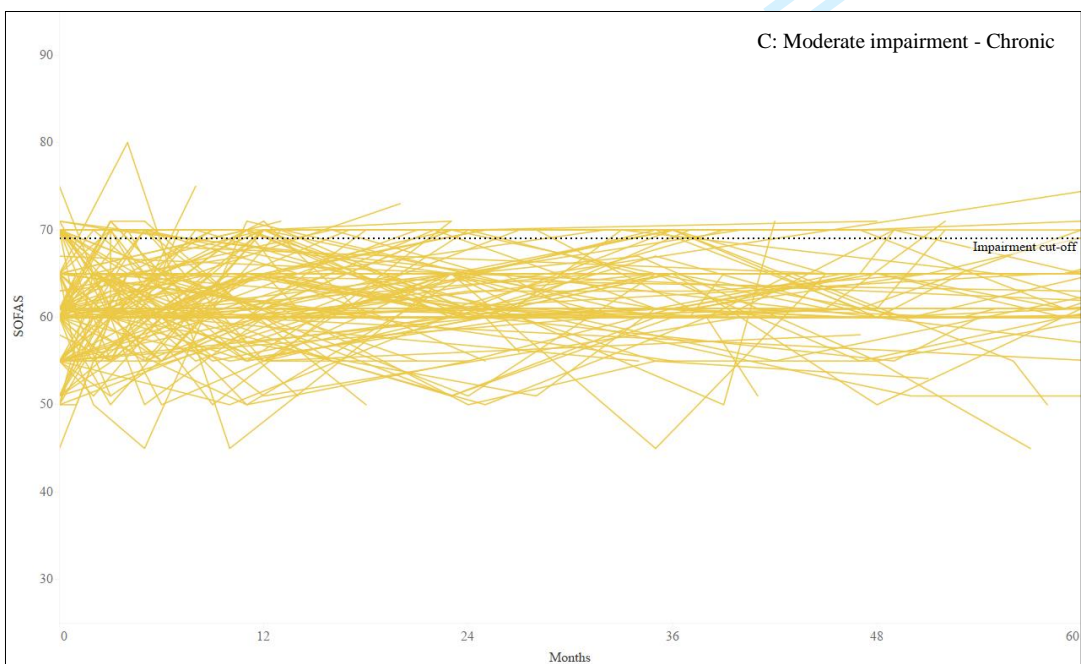

1  
2  
3  
4  
5  
6  
7  
8  
9  
10  
11  
12  
13  
14  
15  
16  
17  
18  
19  
20  
21  
22  
23  
24  
25  
26  
27  
28  
29  
30  
31  
32  
33  
34  
35  
36  
37  
38  
39  
40  
41  
42  
43  
44  
45  
46  
47  
48  
49  
50  
51  
52  
53  
54  
55  
56  
57  
58  
59  
60

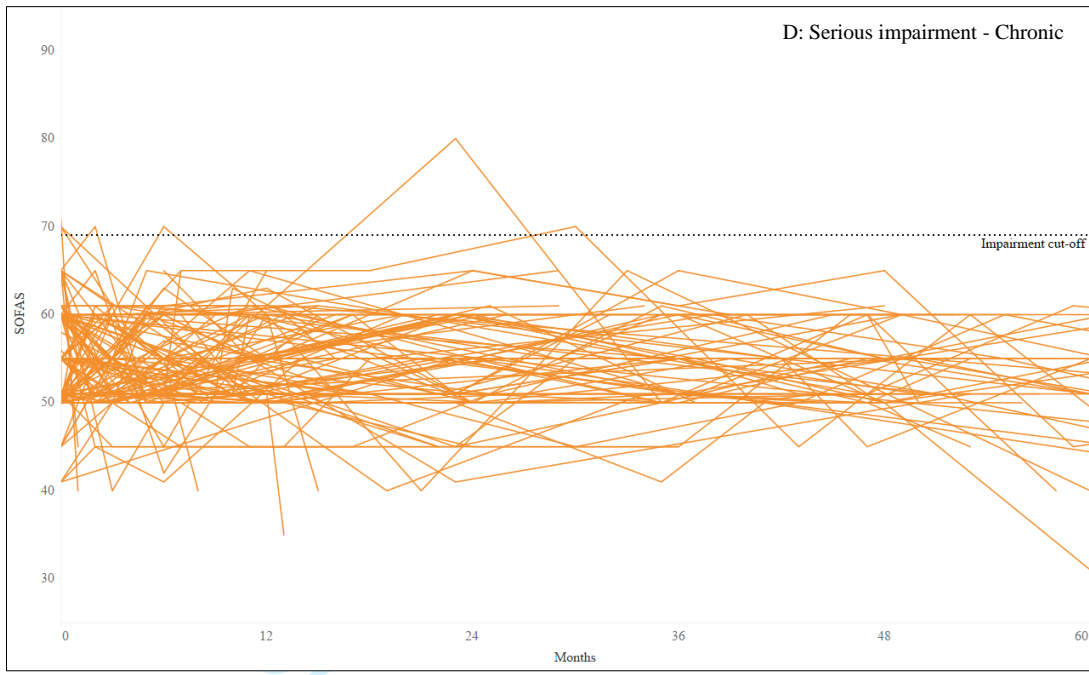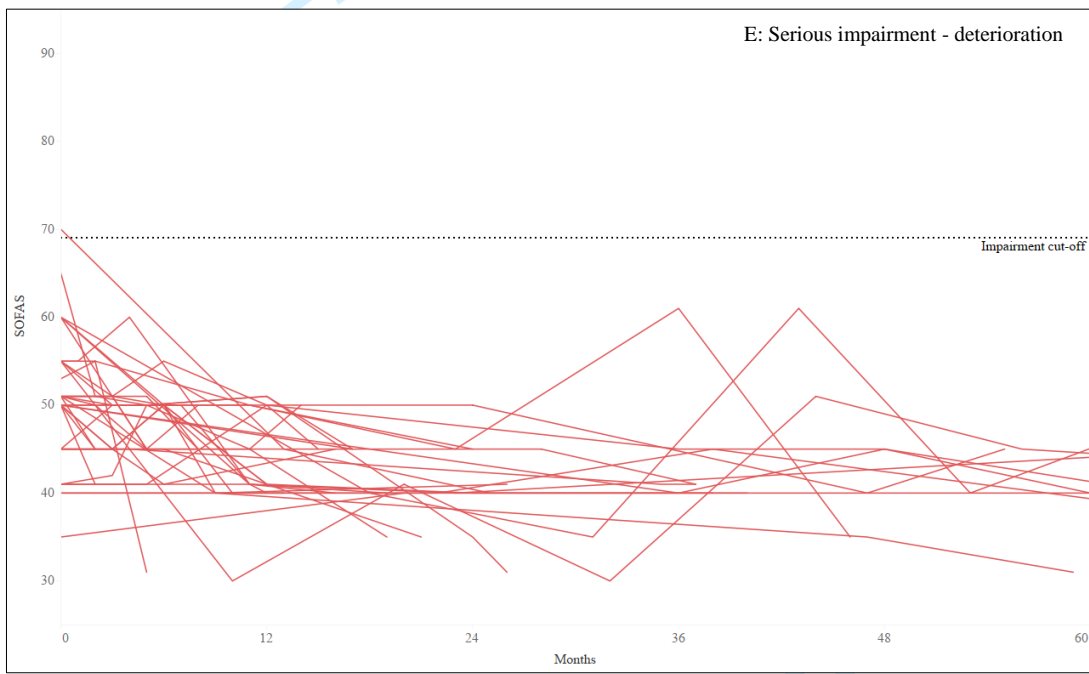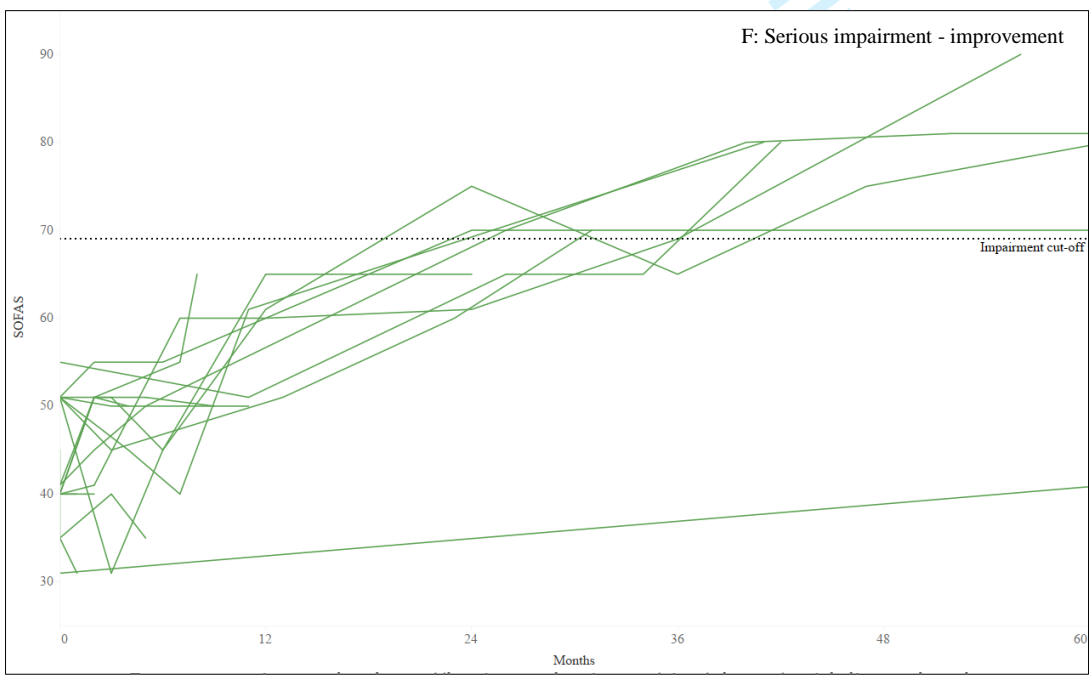

**Supplementary Figure 1 caption**

Supplementary figure 1 shows the individual-level trajectories for each group identified and shown in figure 1. Each line represents one individual and their SOFAS score ratings over time. The dotted line represents the clinical impairment cut-off, which is set at a SOFAS score of 69. Panel A: Slight impairment – stable (n=24, 4%), intercept equal to 78 and linear trend over time; Panel B: Mild impairment – improvement (n=129, 23%), intercept equal to 68 and quadratic trend over time; Panel C: Moderate impairment – chronic (n=185, 33%), intercept equal to 61 and linear trend over time; Panel D: Serious impairment – chronic (n=158, 29%), intercept equal to 55 and linear trend over time; Panel E: Serious impairment – improvement (n=19, 4%), intercept equal to 42 and quadratic trend over time; Panel F: Serious impairment – deterioration (n=39, 7%), intercept equal to 51 and quadratic trend over time.

For peer review only

STROBE Statement—Checklist of items that should be included in reports of *cohort studies*

|                          | Item No | Recommendation                                                                                                                                                                                    |            |
|--------------------------|---------|---------------------------------------------------------------------------------------------------------------------------------------------------------------------------------------------------|------------|
| Title and abstract       | 1       | (a) Indicate the study's design with a commonly used term in the title or the abstract                                                                                                            | P1         |
|                          |         | (b) Provide in the abstract an informative and balanced summary of what was done and what was found                                                                                               | P2         |
| <b>Introduction</b>      |         |                                                                                                                                                                                                   |            |
| Background/rationale     | 2       | Explain the scientific background and rationale for the investigation being reported                                                                                                              | P4-5       |
| Objectives               | 3       | State specific objectives, including any prespecified hypotheses                                                                                                                                  | P5         |
| <b>Methods</b>           |         |                                                                                                                                                                                                   |            |
| Study design             | 4       | Present key elements of study design early in the paper                                                                                                                                           | P5-6       |
| Setting                  | 5       | Describe the setting, locations, and relevant dates, including periods of recruitment, exposure, follow-up, and data collection                                                                   | P5         |
| Participants             | 6       | (a) Give the eligibility criteria, and the sources and methods of selection of participants. Describe methods of follow-up                                                                        | P5         |
|                          |         | (b) For matched studies, give matching criteria and number of exposed and unexposed                                                                                                               | -          |
| Variables                | 7       | Clearly define all outcomes, exposures, predictors, potential confounders, and effect modifiers. Give diagnostic criteria, if applicable                                                          | P5-7       |
| Data sources/measurement | 8*      | For each variable of interest, give sources of data and details of methods of assessment (measurement). Describe comparability of assessment methods if there is more than one group              | P6         |
| Bias                     | 9       | Describe any efforts to address potential sources of bias                                                                                                                                         | -          |
| Study size               | 10      | Explain how the study size was arrived at                                                                                                                                                         | -          |
| Quantitative variables   | 11      | Explain how quantitative variables were handled in the analyses. If applicable, describe which groupings were chosen and why                                                                      | P7         |
| Statistical methods      | 12      | (a) Describe all statistical methods, including those used to control for confounding                                                                                                             | P7         |
|                          |         | (b) Describe any methods used to examine subgroups and interactions                                                                                                                               | P7         |
|                          |         | (c) Explain how missing data were addressed                                                                                                                                                       | P6-7       |
|                          |         | (d) If applicable, explain how loss to follow-up was addressed                                                                                                                                    |            |
|                          |         | (e) Describe any sensitivity analyses                                                                                                                                                             |            |
| <b>Results</b>           |         |                                                                                                                                                                                                   |            |
| Participants             | 13*     | (a) Report numbers of individuals at each stage of study—eg numbers potentially eligible, examined for eligibility, confirmed eligible, included in the study, completing follow-up, and analysed | P7         |
|                          |         | (b) Give reasons for non-participation at each stage                                                                                                                                              | P6         |
|                          |         | (c) Consider use of a flow diagram                                                                                                                                                                |            |
| Descriptive data         | 14*     | (a) Give characteristics of study participants (eg demographic, clinical, social) and information on exposures and potential confounders                                                          | P7,8,12,13 |
|                          |         | (b) Indicate number of participants with missing data for each variable of interest                                                                                                               | P7-8       |
|                          |         | (c) Summarise follow-up time (eg, average and total amount)                                                                                                                                       | P8         |
| Outcome data             | 15*     | Report numbers of outcome events or summary measures over time                                                                                                                                    | P8-13      |
| Main results             | 16      | (a) Give unadjusted estimates and, if applicable, confounder-adjusted estimates and their precision (eg, 95% confidence interval). Make clear                                                     | P11-12     |

|                          |    |                                                                                                                                                                            |        |
|--------------------------|----|----------------------------------------------------------------------------------------------------------------------------------------------------------------------------|--------|
|                          |    | which confounders were adjusted for and why they were included                                                                                                             |        |
|                          |    | (b) Report category boundaries when continuous variables were categorized                                                                                                  | -      |
|                          |    | (c) If relevant, consider translating estimates of relative risk into absolute risk for a meaningful time period                                                           | -      |
| Other analyses           | 17 | Report other analyses done—eg analyses of subgroups and interactions, and sensitivity analyses                                                                             | P8-11  |
| <b>Discussion</b>        |    |                                                                                                                                                                            |        |
| Key results              | 18 | Summarise key results with reference to study objectives                                                                                                                   | P13-14 |
| Limitations              | 19 | Discuss limitations of the study, taking into account sources of potential bias or imprecision. Discuss both direction and magnitude of any potential bias                 | P15-16 |
| Interpretation           | 20 | Give a cautious overall interpretation of results considering objectives, limitations, multiplicity of analyses, results from similar studies, and other relevant evidence | P14-15 |
| Generalisability         | 21 | Discuss the generalisability (external validity) of the study results                                                                                                      | P14-16 |
| <b>Other information</b> |    |                                                                                                                                                                            |        |
| Funding                  | 22 | Give the source of funding and the role of the funders for the present study and, if applicable, for the original study on which the present article is based              | P17    |

\*Give information separately for exposed and unexposed groups.

**Note:** An Explanation and Elaboration article discusses each checklist item and gives methodological background and published examples of transparent reporting. The STROBE checklist is best used in conjunction with this article (freely available on the Web sites of PLoS Medicine at <http://www.plosmedicine.org/>, Annals of Internal Medicine at <http://www.annals.org/>, and Epidemiology at <http://www.epidem.com/>). Information on the STROBE Initiative is available at <http://www.strobe-statement.org>.

# BMJ Open

## **Delineating the trajectories of social and occupational functioning of young people attending primary-care based, early intervention mental health services in Australia: A longitudinal study**

|                                 |                                                                                                                                                                                                                                                                                                                                                                                                                                                                                                                                                                                                                                  |
|---------------------------------|----------------------------------------------------------------------------------------------------------------------------------------------------------------------------------------------------------------------------------------------------------------------------------------------------------------------------------------------------------------------------------------------------------------------------------------------------------------------------------------------------------------------------------------------------------------------------------------------------------------------------------|
| Journal:                        | <i>BMJ Open</i>                                                                                                                                                                                                                                                                                                                                                                                                                                                                                                                                                                                                                  |
| Manuscript ID                   | bmjopen-2017-020678.R2                                                                                                                                                                                                                                                                                                                                                                                                                                                                                                                                                                                                           |
| Article Type:                   | Research                                                                                                                                                                                                                                                                                                                                                                                                                                                                                                                                                                                                                         |
| Date Submitted by the Author:   | 06-Feb-2018                                                                                                                                                                                                                                                                                                                                                                                                                                                                                                                                                                                                                      |
| Complete List of Authors:       | Iorfino, Frank; The University of Sydney, Brain and Mind Centre<br>Hermens, Daniel; The University of Sydney, Brain and Mind Centre<br>Cross, Shane; The University of Sydney, Brain and Mind Centre<br>Zmicerevska, Natalia; The University of Sydney, Brain and Mind Centre<br>Nichles, Alissa; The University of Sydney, Brain and Mind Centre<br>Badcock, Caro-Anne; The University of Sydney, Statistical Consulting<br>Groot, Josine; The University of Sydney, Brain and Mind Centre<br>Scott, Elizabeth; The University of Sydney, Brain and Mind Centre<br>Hickie, Ian; The University of Sydney, Brain and Mind Centre |
| <b>Primary Subject Heading</b>: | Mental health                                                                                                                                                                                                                                                                                                                                                                                                                                                                                                                                                                                                                    |
| Secondary Subject Heading:      | Health services research                                                                                                                                                                                                                                                                                                                                                                                                                                                                                                                                                                                                         |
| Keywords:                       | MENTAL HEALTH, Health services, Longitudinal study, Young people, Functional impairment                                                                                                                                                                                                                                                                                                                                                                                                                                                                                                                                          |
|                                 |                                                                                                                                                                                                                                                                                                                                                                                                                                                                                                                                                                                                                                  |

SCHOLARONE™  
Manuscripts



1  
2  
3  
4  
5  
6  
7 **Delineating the trajectories of social and occupational functioning of young**  
8 **people attending primary-care based, early intervention mental health**  
9 **services in Australia: A longitudinal study**  
10

11  
12  
13  
14 Frank Iorfino<sup>a</sup>, Daniel. F. Hermens<sup>a</sup>, Shane Cross<sup>a</sup>, Natalia Zmicerevska<sup>a</sup>, Alissa  
15 Nichles<sup>a</sup>, Caro-Anne Badcock<sup>b</sup>, Josine Groot<sup>a</sup>, Elizabeth Scott<sup>a</sup>, & Ian. B. Hickie<sup>a</sup>  
16  
17

18  
19  
20  
21 <sup>a</sup> Youth Mental Health Team, Brain and Mind Centre, University of Sydney, Sydney,  
22 Australia.  
23

24 <sup>b</sup> Statistical Consulting, University of Sydney, Sydney, Australia.  
25  
26  
27  
28  
29  
30

31 **Corresponding author:** Frank Iorfino, 94 Mallet Street Camperdown NSW 2050,  
32 [frank.iorfino@sydney.edu.au](mailto:frank.iorfino@sydney.edu.au), 9351 0827  
33  
34

35  
36 **Word count:** 3572  
37  
38  
39  
40  
41  
42  
43  
44  
45  
46  
47  
48  
49  
50  
51  
52  
53  
54  
55  
56  
57  
58  
59  
60

## ABSTRACT

**Objectives:** Mental disorders typically emerge during adolescence and young adulthood and put young people at risk for prolonged socio-economic difficulties. This study describes the longitudinal course of social and occupational functioning of young people attending primary-care based, early intervention services.

**Design:** A longitudinal study of young people receiving mental healthcare.

**Setting:** Data were collected between January 2005 and August 2017 from a designated primary-care based mental health service.

**Participants:** 554 young people (54% female) aged 12 to 32 years.

**Measures:** A systematic medical file audit collected clinical and functional information at predetermined time intervals (i.e. 3 months to 5+ years) using a clinical proforma. Group-based trajectory modelling (GBTM) was used to identify distinct trajectories of social and occupational functioning over time (median number of observations per person = 4; median follow up time = 23 months).

**Results:** Between first clinical contact and time last seen, 15% of young people had reliably deteriorated, 23% improved and 62% did not demonstrate substantive change in function. Of the whole cohort, 69% had SOFAS scores less than 70 at time last seen, indicative of ongoing and substantive impairment. GBTM identified six distinct functional trajectories whereby over 60% had moderate to serious functional impairment at entry and remained chronically impaired over time; 7% entered with serious impairment and deteriorated further; one quarter were mildly impaired at entry and functionally recovered; and only a small minority (4%) presented with serious impairments and functionally improved over time. Not being in education, employment or training, previous hospitalisation and a younger age at baseline emerged as significant predictors of these functional trajectories.

**Conclusion:** Young people with emerging mental disorders have significant functional impairment at presentation for care, and for the majority, it persists over the course of clinical care. Despite the logic of providing clinical care earlier in the course of illness, these data suggest that more sophisticated and more intensive

individual-level and organisational strategies may be required to achieve significant and sustained functional improvements.

**Key words:** Mental health; longitudinal study; functional impairment; young people; health services

### Strengths and limitations of this study

- This study utilised a rich data set of 554 participants with between two and nine observations per person (median = 4; approximately 2200 data points) up to five years after initial presentation and applied a novel group-based trajectory modelling procedure to characterise the pattern of change in functional impairment over time.
- This study is one of the first to report on the long-term functional outcomes for young people attending primary-care based, early intervention mental health services. Its naturalistic design provides valuable insight into the extent of functional impairment over the course of these common mental disorders and identifies the specific needs of young people with these disorders. The study raises specific questions about how to improve health service and individual intervention strategies to monitor, target and improve these outcomes.
- Since this was a naturalistic cohort study, there may be some factors that account for the trajectories or differences in functional outcome that weren't collected in this study, such as socio-economic status, the type and intensity of interventions an individual received or treatment resistance. Since these factors were not uniformly collected it is difficult to make specific conclusions about the effect of specific intervention or service models on these trajectories or outcomes. This will be important for future studies to determine, however it was beyond the scope of this study.
- Since this study focuses on individuals who were continually engaged in clinical care and represents 18% of the total research register it is unclear how representative this sample is of the whole population presenting to these services. Similarly, there is a lack of information about the differences between those who continually engage in care versus those who may have disengaged.

## INTRODUCTION

Mental disorders consistently rank among the leading causes of death and disability worldwide<sup>1-3</sup>. These disorders typically emerge during adolescence and young adulthood and put these young people at risk for prolonged socio-economic difficulties over their lifetime, even when their mental ill health subsides or is sub-threshold<sup>4-7</sup>. There are major direct healthcare costs attributed to diagnosis and treatment, however it is their indirect costs linked to income loss through mortality, disability and regular absences from education or work that impact future income potential and have substantial global economic consequences<sup>8 9</sup>. The significant overlap between these disorders, economic inactivity and functional impairment reiterates the need to recognise and address the common health and economic vulnerabilities of these young people<sup>10</sup>.

The long-term outcomes for most major mental disorders often include high rates of recurrence, and slow or incomplete functional recovery, even among those who may have symptomatically remitted<sup>11-14</sup>. Long term follow up studies among older adults indicate that functional impairment often persists with most people experiencing some degree of disability during the majority of the long term follow up period<sup>15</sup>, while it is common for those within a primary care setting to spend up to one-third of the long term follow up period off work<sup>16</sup>. These patterns are also evident among young people, since most medical and psychological treatments developed to address depression do not consistently improve functioning in these populations<sup>17-19</sup>. Of the few studies that report long-term functional outcomes for young people, most adolescents treated for depression experienced positive functional outcomes up to three years later, however persistent functional impairment was common for those with comorbidity and recurrence of depression<sup>20</sup>. Similarly, young people with psychosis tend to experience significant social disability that persists over time and may be indicative of the difficulty of achieving functional recovery in these groups<sup>21</sup>. For many of these severe mental disorders, the onset of functional deterioration tends to occur prior to the onset of illness and suggests there is the capacity to address these problems early<sup>22 23</sup>.

1  
2  
3  
4  
5 Early intervention services and models of care have been designed to respond to the  
6 early phases of these disorders, their associated comorbidities and impairment, to  
7 prevent or delay the progression of illness and reduce the burden for those at-risk<sup>24-</sup>  
8<sup>26</sup>. Although many young people present with sub-threshold syndromes, they  
9 frequently report significant functional impairment (i.e. reduced functioning in  
10 social, occupational or other areas of daily life) and a high rate of disengagement  
11 from education, employment or training (NEET)<sup>24 27-29</sup>. Over time, functional  
12 impairment tends to be associated with symptom remission, however the overall  
13 level of impairment and rate of disengagement remains high compared to the  
14 community<sup>30-32</sup>. This is particularly the case for those with more severe  
15 presentations who, despite receiving more intensive initial interventions, are  
16 unlikely to functionally recover in relatively short-term care environments<sup>33</sup>. While  
17 the first 12 months of care are characterised by significant changes in functional  
18 impairment<sup>34</sup>, the long-term patterns of functional impairment among young people  
19 engaged in primary mental health care remains largely unknown.  
20  
21  
22  
23  
24  
25  
26  
27  
28  
29  
30

31 Understanding the changes in social and occupational functioning over time in real-  
32 world clinical cohorts is crucial for guiding the development mental health service  
33 provisions that meet the individual needs of young people with emerging mental  
34 disorders. This study examines the longitudinal course of social and occupational  
35 functioning for a cohort of young people after their initial presentation to a primary  
36 mental health care service. We report on the overall rate of change in social and  
37 occupational functioning, and aim to determine whether there are distinct long-term  
38 trajectories (via modeling) of functioning over the course of care.  
39  
40  
41  
42  
43  
44  
45

## 46 **METHODS**

### 47 **Participants**

48 Study participants were drawn from a larger cohort of young people (n=3087; 59%  
49 female, mean age = 18.52 ± 3.8) presenting to the Brain and Mind Centre's youth  
50 mental health clinics in the Sydney suburbs of Camperdown and Campbelltown.  
51 These clinics consist of an integrated mix of primary-level services branded as  
52  
53  
54  
55  
56  
57  
58  
59  
60

1  
2  
3 *headspace*<sup>35</sup> as well as more specialised services including psychiatric services. These  
4 clinics primarily attract young people with a range of mental health problems,  
5 including those with sub-threshold and full threshold mental disorders, who may  
6 have been self-referred, referred via a family member or friend, or else via the  
7 community including external general practitioner, schools or university<sup>29</sup>. The  
8 young people in this study were recruited to a research register for mood, psychotic,  
9 developmental and other mental disorders between January 2005 and August 2017.  
10 All young people received clinician-based case management and relevant  
11 psychological, social and/or medical interventions over the duration of their time in  
12 care, which may also include referral to/from higher tier mental health services or  
13 hospitalisation for those whose needs exceed the capacity of the primary care  
14 services. Individuals were included in the present study if they met the following  
15 inclusion criteria: (i) between 12 and 32 years of age at the time of initial  
16 assessment; (ii) were seen by a clinician on at least two separate occasions. Exclusion  
17 criteria for all potential participants were: medical instability or lack of capacity to  
18 give informed consent (as determined by a psychiatrist), history of neurological  
19 disease (e.g. tumor, head trauma, epilepsy), medical illness known to impact  
20 cognitive and brain function (e.g. cancer, ECT in last 3 months), and/or clinically  
21 evident intellectual disability and/or insufficient English to participate in the  
22 research protocol. The study was approved by the University of Sydney Human  
23 Research Ethics Committee.  
24  
25  
26  
27  
28  
29  
30  
31  
32  
33  
34  
35  
36  
37  
38

### 39 **Data collection process**

40 Trained research psychologists and medical officers conducted a medical file audit to  
41 collect demographic, clinical and functional information at predetermined time  
42 intervals using a clinical proforma (see details below). The first available clinical  
43 assessment at the service was taken as the baseline time point for each participant  
44 and the date of this assessment was used to determine each of the follow up time  
45 points: 3 months, 6 months, 12 months, 2 years, 3 years, 4 years, and 5 years. If no  
46 clinical notes were available within +/- 1 month of the 3 and 6 month time points, or  
47 +/- 3 months of the yearly time points then this particular entry was left missing. A  
48 'time last seen' entry was also used to capture final clinical information that did not  
49 align with one of the specified time points to ensure that every participant had data  
50  
51  
52  
53  
54  
55  
56  
57  
58  
59  
60

1  
2  
3 entered for the total time they were engaged with the clinical service. When data was  
4 available for a specified time point, all clinical notes from the preceding proforma  
5 entry, up to and including the current proforma entry were used to complete the  
6 proforma.  
7  
8  
9

### 10 11 **Clinical proforma**

12 The clinical proforma captures key clinical information about the current episode  
13 and specific illness course characteristics, and an earlier version has been used in  
14 previous studies<sup>24–29</sup>. The proforma collects information about; (i) basic  
15 demographics (age, gender, receipt of government benefits); (ii) mental health  
16 diagnoses (based on DSM-V criteria); (iii) clinical course information  
17 (hospitalisations, childhood diagnoses); (iv) comorbidities (physical health  
18 diagnoses, such as autoimmune, endocrine, metabolic etc., and suicidal thoughts and  
19 behaviours); and (v) functioning (assessed using the Social Occupational Functional  
20 Assessment Scale (SOFAS)<sup>36</sup> and engagement in part-time or fulltime education,  
21 employment or training, used to determine not in education, employment or training  
22 [NEET] status). The SOFAS is a clinician-rated measure that assesses functioning on a  
23 0–100 scale, with lower scores suggesting more severe impairment. The instructions  
24 emphasise that the rater should aim to avoid confounding the rating with clinical  
25 symptoms.  
26  
27  
28  
29  
30  
31  
32  
33  
34  
35  
36  
37

### 38 **Statistical analyses**

39 Statistical analyses were performed using SAS Software (SAS Institute). Overall  
40 changes in functioning (i.e. 'improvement', 'no change' and 'deterioration') between  
41 baseline and time last seen were determined using a Reliable Change Index (RCI)  
42 score of 10-points, and a clinically significant cut-off of equal to or above 69 was  
43 used<sup>32–34,37</sup>. To characterise the pattern of change in functional impairment over time  
44 we used group-based trajectory modelling (GBTM) using a procedure called PROC  
45 TRAJ (Nagin & Odgers, 2010). This method estimates multiple trajectory groups  
46 within the population and uses a maximum-likelihood method to calculate the  
47 probability of membership within each trajectory for each participant. We first fit the  
48 null model (one group model), and progressively increased the number of groups  
49 until we reached the optimal number of trajectory groups, which was determined  
50  
51  
52  
53  
54  
55  
56  
57  
58  
59  
60



1  
2  
3 using the Bayesian Information Criterion (BIC). A higher number (i.e. smaller  
4 negative number) indicates a better balance between model complexity and model  
5 fit. The shape of each trajectory was examined by modelling three parameters  
6 (linear, quadratic, cubic) and then, starting with the higher order polynomials,  
7 dropping non-significant parameters from the model. If all three parameters were  
8 not significant the linear parameter was retained. Finally, to explore which baseline  
9 factors were associated with each trajectory group, we used stepwise logistic  
10 regression, which included baseline demographic and clinical characteristics; age,  
11 gender, receipt of government benefits, NEET status, mental health diagnosis,  
12 medical diagnosis, childhood mental health diagnosis, hospitalised (ever), suicide  
13 ideation (ever), suicide planning (ever), and suicide attempts (ever). An  $\alpha$  level for  
14 entry and exclusion were set at  $P=0.15$  and based on the likelihood ratio statistic.  
15  
16  
17  
18  
19  
20  
21  
22  
23

## 24 **RESULTS**

### 25 **Sample characteristics**

26 The sample consisted of 554 young people, 54% (297/554) were female and the  
27 mean age was 19.83 (SD = 3.77). At baseline, 20% (113/554) identified as NEET,  
28 17% (95/554) were currently receiving government benefits and the majority (78%;  
29 423/542) were in the clinical range of functional impairment (ie. SOFAS score < 69).  
30 The most common primary diagnosis was depression (43%; 237/548), followed by  
31 bipolar disorder (20%; 108/548), and then anxiety (18%; 99/548) with comorbid  
32 mental health problems identified in 79% (428/544) of participants. Physical health  
33 comorbidities were reported in 26% (142/554) of participants, 23% (127/554) had  
34 previously been hospitalised due to a mental health problem, and 14% (75/554) had  
35 a mental health or behavioural diagnosis in childhood.  
36  
37  
38  
39  
40  
41  
42  
43  
44  
45

### 46 **Changes in functional impairment between baseline and time last seen**

47 The number of follow up time points recorded for an individual varied between 2  
48 and 9 (median = 4)(figure1) and the number of months between baseline and time  
49 last seen was between 1 and 126 (median = 23 months)(figure 2). The occurrence of  
50 time last seen was spread with 38% (208/554) occurring within the first 12 months  
51 after baseline and 62% (346/554) occurring more than one year after baseline.  
52 Overall, between baseline and time last seen, 15% (79/538) had reliably  
53  
54  
55  
56  
57  
58  
59  
60



1  
2  
3 deteriorated, 23% (122/538) reliably improved and 62% (337/538) did not reliably  
4 change, while 69% (370/538) were below the clinical cut-off (SOFAS <69) at time  
5 last seen.  
6  
7

### 8 9 **Identifying functional impairment trajectories**

10  
11 GBTM identified that six distinct trajectories provided the best balance between  
12 model complexity and model fit for the data (table 1). The BIC continued to increase  
13 as the number of groups increased, however the BIC change from seven to nine  
14 trajectories were small and resulted in trajectory groups with very small sample  
15 sizes that did not add useful information beyond that provided by the six trajectories.  
16 Table 2 shows the model selection process for the shape of each of the six  
17 trajectories. We started with all three parameters in the model (linear, quadratic and  
18 cubic). The final model (model 4) had the highest BIC and contained quadratic  
19 parameters for trajectories 1, 3 and 5 and linear parameters for trajectories 2, 4, and  
20 6.  
21  
22  
23  
24  
25  
26  
27  
28  
29  
30  
31  
32  
33  
34  
35  
36  
37  
38  
39  
40  
41  
42  
43  
44  
45  
46  
47  
48  
49  
50  
51  
52  
53  
54  
55  
56  
57  
58  
59  
60

**Table 1.** Criteria for selecting the number of trajectories

| Number of groups | BIC      | Null model | BIC change |
|------------------|----------|------------|------------|
| 1                | -8773.03 | 0          | -          |
| 2                | -8372.01 | 1          | 401.022    |
| 3                | -8243.31 | 2          | 128.695    |
| 4                | -8215.51 | 3          | 27.802     |
| 5                | -8207.80 | 4          | 7.710      |
| 6                | -8166.46 | 5          | 41.339     |
| 7                | -8164.58 | 6          | 1.882      |
| 8                | -8162.05 | 7          | 2.528      |
| 9                | -8155.80 | 8          | 6.251      |

**Table 1 caption.** BIC = Bayesian Information Criterion. BIC change presents the changes in the BIC value as the number of trajectory group's increases. Large changes in BIC from 1 to 6 groups justified moving towards the more complex model, however changes in BIC from 7 to 9 groups were rather small and compromised the balance between complexity and fit. Six trajectory groups was deemed to be the most parsimonious model that provided the best balance between complexity and fit.

**Table 2.** Model selection for each functional impairment trajectory group.

| Trajectory Group                               | Parameter | Model 1            | Model 2            | Model 3            | Model 4            |
|------------------------------------------------|-----------|--------------------|--------------------|--------------------|--------------------|
| <b>1</b><br>Serious impairment – deterioration | Intercept | 51.61208           | 51.77906           | 51.21822           | 50.92215           |
|                                                | Linear    | <b>-0.84458***</b> | <b>-0.86418***</b> | <b>-0.50281***</b> | <b>-0.49666***</b> |
|                                                | Quadratic | <b>0.02424**</b>   | <b>0.02483**</b>   | <b>0.00607**</b>   | <b>0.00599**</b>   |
|                                                | Cubic     | <b>-0.00022*</b>   | -0.00022           | .                  | .                  |
| <b>2</b><br>Serious impairment - chronic       | Intercept | 54.98897           | 54.95892           | 54.54367           | 54.75505           |
|                                                | Linear    | -0.19938           | -0.18538           | 0.02760            | -0.03218           |
|                                                | Quadratic | 0.00966            | 0.00901            | -0.00110           | .                  |
|                                                | Cubic     | <b>-0.00012*</b>   | -0.00012           | .                  | .                  |
| <b>3</b><br>Serious impairment - improvement   | Intercept | 41.08481           | 42.22558           | 42.03591           | 42.21444           |
|                                                | Linear    | <b>1.76596***</b>  | <b>1.26818***</b>  | <b>1.26797***</b>  | <b>1.25871***</b>  |
|                                                | Quadratic | <b>-0.03534*</b>   | <b>-0.01123***</b> | <b>-0.01116***</b> | <b>-0.01106***</b> |
|                                                | Cubic     | 0.00028            | .                  | .                  | .                  |
| <b>4</b><br>Moderate impairment - chronic      | Intercept | 61.20176           | 61.32354           | 61.52807           | 61.44346           |
|                                                | Linear    | 0.09497            | 0.04047            | 0.01924            | 0.02027            |
|                                                | Quadratic | -0.00309           | -0.00039           | .                  | .                  |
|                                                | Cubic     | 0.00003            | .                  | .                  | .                  |
| <b>5</b><br>Mild impairment - improvement      | Intercept | 67.79146           | 68.08779           | 68.12046           | 68.11021           |
|                                                | Linear    | <b>0.46038***</b>  | <b>0.31975***</b>  | <b>0.32482***</b>  | <b>0.32399***</b>  |
|                                                | Quadratic | <b>-0.01202*</b>   | <b>-0.00468***</b> | <b>-0.00478***</b> | <b>-0.00477***</b> |
|                                                | Cubic     | 0.00009            | .                  | .                  | .                  |
| <b>6</b><br>Slight impairment - stable         | Intercept | 77.35888           | 77.40056           | 77.94966           | 77.93924           |
|                                                | Linear    | 0.19581            | 0.13170            | 0.04127            | 0.04153            |
|                                                | Quadratic | -0.00575           | -0.00168           | .                  | .                  |
|                                                | Cubic     | 0.00005            | .                  | .                  | .                  |
| <b>Model fit</b>                               | BIC       | -8166.462          | -8156.357          | -8148.227          | -8145.595          |

**Table 2 caption.** Parameter estimates are shown. Significant values are bolded. \*P<.05, \*\*P<.01, \*\*\*P<.001. The first model identified that the cubic parameters for trajectories 3, 4, 5 or 6 were not significant and were thus dropped for model 2. Model 2 identified that the quadratic parameters for trajectories 4 and 6 were not significant, and that the cubic parameter for trajectories 1 and 2 were not significant and were dropped for model 3. Model 3 identified that the quadratic parameter for trajectory 2 was not significant and was dropped for model 4. The final model (model 4) had the highest BIC and contained quadratic parameters for trajectories 1, 3 and 5 and linear parameters for trajectories 2, 4, and 6.

1  
2  
3 Figure 3 shows SOFAS score over a 5 year period for the six trajectories included in  
4 the final model (see supplementary figure 1 for individual-level trajectories for each  
5 group). Three trajectories start out with serious functional impairment at baseline  
6 but differ in the type of change in functioning over time. The first was the second  
7 largest group of the entire sample (29%; 158/554) and included individuals who  
8 followed a chronic course of serious functional impairment with little to no change in  
9 functioning over time ('serious impairment - chronic'). The second trajectory was  
10 quadratic and included individuals who significantly deteriorated in the first 12  
11 months before plateauing between 12 and 60 months ('serious impairment -  
12 deterioration'), while the third trajectory was also quadratic and included the small  
13 minority who improved significantly over the first 24 months to mild levels of  
14 functional impairment before slightly tapering off with mild to no functional  
15 impairment ('serious impairment - improvement'). By contrast, the remaining three  
16 trajectories each started out with moderate to mild levels of functional impairment.  
17 The first included the largest number of people across the entire sample (33%;  
18 185/554) who presented with moderate impairment and followed a chronic course  
19 of moderate impairment over time ('moderate impairment - chronic'). The second  
20 trajectory was quadratic and characterised by individuals who were mildly impaired  
21 at baseline, but improved/functionally recovered in the first 6 to 12 months before  
22 tapering off and remaining in the functional recovered population over time ('mild  
23 impairment - improvement'). The final trajectory group characterised the small  
24 number of individuals who were functioning well with no more than slight  
25 impairment at baseline and whose functioning was stable over time ('slight  
26 impairment - stable').  
27  
28  
29  
30  
31  
32  
33  
34  
35  
36  
37  
38  
39  
40  
41  
42  
43

#### 44 **Differentiating between functional impairment trajectories**

45 The aim of these analyses were to identify any demographic and clinical differences  
46 at baseline between the trajectory groups. The 'serious impairment - chronic'  
47 trajectory was chosen as the reference group because of the most impaired groups at  
48 entry, this group was the largest group and followed a stable/chronic trajectory over  
49 time. Of the demographic and clinical variables at baseline (table 3); NEET status, age  
50 and previous hospitalisations emerged as the factors that differentiated trajectory  
51 groups and were included in the reduced model. NEET status distinguished between  
52  
53  
54  
55  
56  
57  
58  
59  
60

most trajectories, whereby those on the 'serious impairment - chronic' trajectory were less likely to be engaged in education, employment or training compared to 'moderate impairment - chronic' (OR = 0.47, 95% CI 0.27 - 0.83,  $p < 0.01$ ), 'mild impairment - improvement' (OR = 0.08, 95% CI 0.03 - 0.23,  $p < 0.001$ ) and 'slight impairment - stable' (OR = 0.09, 95% CI 0.01 - 0.70,  $p < 0.05$ ). Regarding age, those on the 'serious impairment - chronic' trajectory were: older than those on the 'serious impairment - improvement' trajectory (OR = 0.83, 95% CI 0.71 - 0.98,  $p < 0.05$ ), and younger than those on the 'mild impairment - improvement' trajectory (OR = 1.08, 95% CI 1.00 - 1.16,  $p < 0.05$ ). For previous hospitalisation, those on the 'serious impairment - chronic' trajectory were more likely to have been previously hospitalised than those on the 'mild impairment - improvement' trajectory (OR = 2.72, 95% CI 1.39 - 5.33,  $p < 0.01$ ).

**Table 3:** Baseline characteristics by functional impairment trajectory group (n=554)

|                                | Total sample | Serious impairment - deterioration | Serious impairment - chronic | Serious impairment - improvement | Moderate impairment - chronic | Mild impairment - improvement | Slight impairment - stable |
|--------------------------------|--------------|------------------------------------|------------------------------|----------------------------------|-------------------------------|-------------------------------|----------------------------|
| N (%)                          | 554 (100%)   | 39 (7%)                            | 158 (29%)                    | 19 (4%)                          | 185 (33%)                     | 129 (23%)                     | 24 (4%)                    |
| Age, mean (sd)                 | 19.83 (3.77) | 20.26 (4.05)                       | 19.68 (3.70)                 | 18.37 (4.76)                     | 19.75 (3.88)                  | 20.12 (3.35)                  | 20.29 (4.23)               |
| Female, n (%)                  | 297 (54%)    | 18 (49%)                           | 77 (52%)                     | 10 (56%)                         | 103 (60%)                     | 70 (58%)                      | 19 (83%)                   |
| NEET, n (%)                    | 113 (20%)    | 20 (51%)                           | 47 (30%)                     | 9 (47%)                          | 32 (17%)                      | 4 (3%)                        | 1 (4%)                     |
| Receiving gov. benefits, n (%) | 95 (17%)     | 16 (41%)                           | 35 (22%)                     | 4 (21%)                          | 27 (15%)                      | 11 (9%)                       | 2 (8%)                     |
| SOFAS score, mean (sd)         | 60.45 (9.19) | 50.61 (7.25)                       | 54.90 (5.63)                 | 43.83 (7.05)                     | 61.39 (5.24)                  | 68.06 (5.35)                  | 78.13 (7.56)               |
| Depression, n (%)              | 237 (43%)    | 14 (37%)                           | 70 (45%)                     | 10 (53%)                         | 72 (39%)                      | 59 (47%)                      | 12 (50%)                   |
| Anxiety, n (%)                 | 99           | 6 (16%)                            | 24 (15%)                     | 1 (5%)                           | 36 (20%)                      | 27 (21%)                      | 5 (21%)                    |

|                                  |           |          |          |          |          |          |         |
|----------------------------------|-----------|----------|----------|----------|----------|----------|---------|
| (%)                              | (18%)     |          |          |          |          |          |         |
| Bipolar, n (%)                   | 108 (20%) | 4 (11%)  | 31 (20%) | 3 (16%)  | 38 (21%) | 26 (21%) | 6 (25%) |
| Psychosis, n (%)                 | 34 (6%)   | 5 (13%)  | 10 (6%)  | 1 (5%)   | 14 (8%)  | 4 (3%)   | 0 (0%)  |
| Other, n (%)                     | 70 (13%)  | 9 (24%)  | 22 (14%) | 4 (21%)  | 23 (13%) | 11 (9%)  | 1 (4%)  |
| Has a medical diagnosis, n (%)   | 142 (26%) | 10 (26%) | 41 (26%) | 5 (26%)  | 51 (28%) | 28 (22%) | 7 (29%) |
| Had a childhood diagnosis, n (%) | 75 (14%)  | 8 (24%)  | 23 (17%) | 4 (22%)  | 21 (12%) | 18 (15%) | 1 (4%)  |
| Hospitalised (ever), n (%)       | 127 (23%) | 9 (27%)  | 48 (35%) | 7 (37%)  | 40 (23%) | 18 (16%) | 5 (24%) |
| Suicide ideation (ever), n (%)   | 258 (47%) | 15 (44%) | 76 (57%) | 10 (59%) | 89 (53%) | 59 (50%) | 9 (41%) |
| Suicide planning (ever), n (%)   | 94 (17%)  | 4 (12%)  | 38 (29%) | 5 (29%)  | 29 (18%) | 16 (14%) | 2 (10%) |
| Suicide attempts (ever), n (%)   | 91 (16%)  | 7 (20%)  | 36 (27%) | 5 (28%)  | 22 (13%) | 17 (15%) | 4 (18%) |

**Table 3 caption:** Column percentages are shown, except for the first row which shows the sample size for each trajectory group as a percentage of the total N. NEET, Not in Education, Employment or Training; SOFAS, Social and Occupational Functional Assessment Scale.

## DISCUSSION

Young people with emerging mental disorders have significant functional impairment that is dynamic and chronic over the course of clinical care. Improvement occurs throughout the course of care, however the rate of clinical impairment and functional deterioration remains high for a large number of people.

1  
2  
3 The results also indicate that while individual trajectories may be highly variable,  
4 there are distinct patterns of social and occupational functioning that are  
5 differentiated by the level of functioning at entry and rate of change over the course  
6 of clinical care. Over 60% of the sample had moderate to serious functional  
7 impairment at entry and remained chronically impaired over time, a further 7%  
8 entered with serious impairment and deteriorated further, while approximately a  
9 quarter of the sample were mildly impaired at entry and were able to improve and  
10 functionally recover. Only a small minority (4%), the youngest of the trajectory  
11 groups, presented with serious impairments and were able to functionally improve  
12 over time. This may reflect the benefits of early intervention, however this requires  
13 further investigation. These distinct trajectories highlight the need for improving  
14 mental health service and individual intervention strategies to monitor and directly  
15 target these problems over the course of care to facilitate clinical, social and  
16 occupational recovery<sup>10</sup>.  
17  
18  
19  
20  
21  
22  
23  
24  
25  
26

27  
28 The overall rate of reliable change in this study was comparable to studies conducted  
29 in similar cohorts that were followed for relatively short-term occasions of service.  
30 The rate of reliable improvement in this study (23%) is consistent with a similar  
31 cohort of young people followed for approximately 6 months (25%)<sup>34</sup> and slightly  
32 lower than an Australian national study of young people attending *headspace*  
33 followed for approximately 3 months (31%)<sup>32</sup>. Interestingly, the rate of reliable  
34 deterioration in this study was consistent with the national study at approximately  
35 15%, which suggests that deterioration occurs early and often persists over longer  
36 periods. While the overall rate of change is important, this study examined the longer  
37 term patterns of change (i.e. over a 5-year period), which were informed by multiple  
38 time points. This revealed that across all levels of impairment there were high rates  
39 of chronicity with many individuals remaining at similar levels of functioning over  
40 the course of care. For some who may have been on a path of deterioration prior to  
41 presentation for care, maintaining a consistent level of impairment may reflect a  
42 positive outcome whereby engagement with care stabilised their situation or  
43 prevented further deterioration or worsening. For others, however, not being able to  
44 return to work or education, or improve social functioning could be detrimental to  
45 their future health and socio-economic wellbeing and may reflect a lack of sufficient  
46  
47  
48  
49  
50  
51  
52  
53  
54  
55  
56  
57  
58  
59  
60

1  
2  
3 integrated psychological and vocational interventions to directly address these  
4 outcomes<sup>38 39</sup>. These results suggest that for those who present with mild functional  
5 impairment, functional improvement is likely to occur relatively quickly (i.e. evident  
6 from the quadratic trend toward improvement within the first 6 months), however  
7 for those with more serious impairment there may be the need for more intensive  
8 strategies delivered over a longer period of time to prevent or address ongoing  
9 functional impairment. Previous research has shown that only a small number of  
10 young people attending these primary mental health services received specific  
11 vocational support in the previous year<sup>30</sup>, despite evidence to suggest that adjunctive  
12 interventions targeting vocational activity can have a positive impact on functional  
13 outcomes<sup>40 41</sup>. Even among those with severe, comorbid disorders, early intervention  
14 combined with focused social recovery has demonstrated clinical utility over early  
15 intervention alone for improving functional outcomes<sup>42</sup>. Together, this reiterates the  
16 need for early intervention and ongoing care that does more to directly address  
17 functional impairment over longer periods, particularly for those who present with  
18 substantial functional impairment.  
19  
20  
21  
22  
23  
24  
25  
26  
27  
28  
29  
30

31 For health services and clinicians, determining when to adopt these intervention  
32 strategies and for whom, is critical. The general trajectories observed in this study  
33 are characterised by substantial individual variation from one time point to the next  
34 (see supplementary figure 1). This individual variability highlights the challenge  
35 health professionals often face when planning effective long-term interventions in a  
36 cohort with emerging mental health disorders. Being NEET, previous hospitalisation  
37 and a younger age at entry was associated with the serious impairment trajectories  
38 compared to the moderate, mild and slight impairment trajectories, however the  
39 long-term predictive utility of these characteristics is still limited. Thus, there is a  
40 need to improve health service approaches to help clinicians identify and track  
41 individual functional outcomes and trajectories over the course of care, so that the  
42 appropriate interventions can be strategically implemented. One solution may be the  
43 development and integration of new and emerging technologies that use routine  
44 outcome measurement and feedback within health services, to deliver more  
45 personalised interventions that respond to an individual's needs<sup>43 44</sup>. Regular  
46 feedback to clinicians and individuals can provide important insights about  
47  
48  
49  
50  
51  
52  
53  
54  
55  
56  
57  
58  
59  
60



1  
2  
3 functional impairment overtime as well as the effectiveness of particular  
4 interventions for addressing key clinical and functional outcomes<sup>45</sup>. These  
5 approaches could also make use of assessments that aim to identify underlying  
6 characteristics, such as cognition, which have demonstrated some utility in  
7 predicting changes in functioning overtime<sup>46-48</sup>.  
8  
9  
10

11  
12  
13 This study has some limitations. The sample used for this study focuses on  
14 individuals who were continually engaged in clinical care, which means that the  
15 overall rate of improvement or deterioration among those who disengaged is  
16 unknown. Furthermore, the overall rate of improvement and deterioration in  
17 functioning at time last seen is imperfect given that many young people may be still  
18 engaged in care and so time last seen may not align with a complete period of care.  
19 This is where the group-based trajectory modelling is beneficial over the overall rate  
20 of change, since it accounts for the overall trends to provide a clearer picture of  
21 change over time. While we know that this sample represents approximately 18% of  
22 the research register (554/3087), it is unclear what proportion of the whole  
23 population attending these services this sample represents. Moreover, given that the  
24 study was conducted within the context of normal clinical service, the clinical and  
25 functional information available for particular individuals was diverse and while the  
26 option for “not enough information available” was provided to raters, it is unclear  
27 how the type of information available impacted on the completion of the clinical  
28 proforma. Finally, there may be other factors that account for these trajectories or  
29 differences in functional outcome that weren't collected, such as, but not limited to,  
30 socio-economic status, the type and intensity of interventions an individual received  
31 or pre-existing undiagnosed learning or developmental disorders. It is important for  
32 future work to determine the effectiveness of specific interventions on functional  
33 impairment trajectories and improving these outcomes to determine the reliability  
34 and validity of the medical file audit process used in this study.  
35  
36  
37  
38  
39  
40  
41  
42  
43  
44  
45  
46  
47  
48  
49  
50

51 This study provides valuable insights into the long-term functional trajectories of  
52 young people engaged in primary mental health care. The significant chronicity  
53 observed in this clinical cohort reiterates that ongoing functional impairment is  
54  
55  
56  
57  
58  
59  
60

1  
2  
3 prevalent among young people with emerging mental health disorders and should be  
4 a primary focus of intervention, in addition to symptomatic improvement. The  
5 substantial variability in individuals trajectories over time highlight the need for  
6 better health service and individual intervention strategies that monitor and target  
7 these outcomes so that early social and occupational impairment does not result in  
8 lifetime socio-economic burden.  
9  
10  
11  
12  
13  
14  
15  
16  
17  
18  
19  
20  
21  
22  
23  
24  
25  
26  
27  
28  
29  
30  
31  
32  
33  
34  
35  
36  
37  
38  
39  
40  
41  
42  
43  
44  
45  
46  
47  
48  
49  
50  
51  
52  
53  
54  
55  
56  
57  
58  
59  
60

## ACKNOWLEDGEMENTS

We would like to thank all the young people who have participated in this study, and all the staff in the Youth Mental Health Team at the Brain and Mind Centre, past and present, who have contributed to this work.

## FUNDING

This study was supported by the National Health & Medical Research Council (NHMRC) Centre of Research Excellence grant (No. 1061043). Professor Ian Hickie is supported by the NHMRC Research fellowship (No. 1046899). Frank Iorfino is supported by an Australian Postgraduate Award (APA).

## COMPETING INTERESTS

All authors have completed the ICMJE uniform disclosure at [www.icmje.org/coi\\_disclosure.pdf](http://www.icmje.org/coi_disclosure.pdf) and declare: Professor Ian Hickie has been a Commissioner in Australia's National Mental Health Commission since 2012. He is the Co-Director, Health and Policy at the Brain and Mind Centre (BMC) University of Sydney. The BMC operates an early-intervention youth services at Camperdown under contract to headspace. Professor Hickie has previously led community-based and pharmaceutical industry-supported (Wyeth, Eli Lilly, Servier, Pfizer, AstraZeneca) projects focused on the identification and better management of anxiety and depression. He is a Board Member of Psychosis Australia Trust and a member of Veterans Mental Health Clinical Reference group. He was a member of the Medical Advisory Panel for Medibank Private until Oct 2017. He is the Chief Scientific Advisor to, and an equity shareholder in, Innowell. InnoWell has been formed by the University of Sydney and PwC to administer the \$30M Australian Government Funded Project Synergy. Project Synergy is a three year program for the transformation of mental health services through the use of innovative technologies. A/Prof Elizabeth Scott is the Medical Director, Young Adult Mental Health Unit, St Vincent's Hospital Darlinghurst, Discipline Leader of Adult Mental Health, School of Medicine, University of Notre Dame, Research Affiliate, The University of Sydney and Consultant Psychiatrist. She has received honoraria for educational seminars related to the clinical management of depressive disorders supported by Servier and Eli-Lilly

1  
2  
3 pharmaceuticals. She has participated in a national advisory board for the  
4 antidepressant compound Pristiq, manufactured by Pfizer. She was the National  
5 Coordinator of an antidepressant trial sponsored by Servier. All remaining authors  
6 declare no support from any organisation for the submitted work besides the  
7 acknowledged financial support; no financial relationships with any organisations  
8 that might have an interest in the submitted work in the previous three years; no  
9 other relationships or activities that could appear to have influenced the submitted  
10 work.  
11  
12  
13  
14  
15

### 16 17 18 **CONTRIBUTORSHIP STATEMENT**

19  
20 FI, DFH, SC and IBH designed the study, interpreted the results and drafted the  
21 manuscript. FI and CAB conducted the statistical analyses. FI, NZ, AN, JG and ES were  
22 involved in study coordination, data collection. All authors contributed to and have  
23 approved the final manuscript.  
24  
25  
26  
27

### 28 29 **DATA SHARING**

30  
31 No additional data available.  
32  
33

### 34 35 **TRANSPARENCY STATEMENT**

36  
37 The lead authors, affirm that this manuscript is an honest, accurate, and transparent  
38 account of the study being reported; that no important aspects of the study have  
39 been omitted; and that any discrepancies from the study as planned have been  
40 explained.  
41  
42  
43  
44  
45  
46  
47  
48  
49  
50  
51  
52  
53  
54  
55  
56  
57  
58  
59  
60

**REFERENCES**

1. Walker ER, McGee RE, Druss BG. Mortality in mental disorders and global disease burden implications: a systematic review and meta-analysis. *JAMA psychiatry* 2015;72(4):334-41.
2. Whiteford HA, Degenhardt L, Rehm J, et al. Global burden of disease attributable to mental and substance use disorders: findings from the Global Burden of Disease Study 2010. *The Lancet* 2013;382(9904):1575-86.
3. Vos T, Barber RM, Bell B, et al. Global, regional, and national incidence, prevalence, and years lived with disability for 301 acute and chronic diseases and injuries in 188 countries, 1990-2013: a systematic analysis for the Global Burden of Disease Study 2013. *The Lancet* 2015;386(9995):743.
4. Goodman A, Joyce R, Smith JP. The long shadow cast by childhood physical and mental problems on adult life. *Proceedings of the National Academy of Sciences* 2011;108(15):6032-37.
5. Merikangas K, He J-p, Burstein M, et al. Lifetime prevalence of mental disorders in US adolescents: results from the National Comorbidity Survey Replication-Adolescent Supplement (NCS-A). *Journal of the American Academy of Child & Adolescent Psychiatry* 2010;49(10):980-89.
6. Gibb SJ, Fergusson DM, Horwood LJ. Burden of psychiatric disorder in young adulthood and life outcomes at age 30. *The British Journal of Psychiatry* 2010;197(2):122-27.
7. Copeland WE, Wolke D, Shanahan L, et al. Adult functional outcomes of common childhood psychiatric problems: a prospective, longitudinal study. *JAMA psychiatry* 2015;72(9):892-99.

- 1  
2  
3 8. Trautmann S, Rehm J, Wittchen HU. The economic costs of mental disorders. *EMBO*  
4  
5 *reports* 2016:e201642951.  
6
- 7 9. Bloom D, Cafiero E, Jané-Llopis E, et al. The global economic burden of  
8  
9 noncommunicable diseases: Program on the Global Demography of Aging, 2012.  
10
- 11 10. Scott J, Fowler D, McGorry P, et al. Adolescents and young adults who are not in  
12  
13 employment, education, or training: British Medical Journal Publishing Group,  
14  
15 2013.  
16
- 17 11. Coryell W, Scheftner W, Keller M, et al. The enduring psychosocial consequences of  
18  
19 mania and depression. *The American journal of psychiatry* 1993  
20
- 21 12. Furukawa T, Takeuchi H, Hiroe T, et al. Symptomatic recovery and social functioning  
22  
23 in major depression. *Acta Psychiatrica Scandinavica* 2001;103(4):257-61.  
24
- 25 13. Kennedy N, Abbott R, Paykel E. Remission and recurrence of depression in the  
26  
27 maintenance era: long-term outcome in a Cambridge cohort. *Psychological*  
28  
29 *medicine* 2003;33(5):827-38.  
30
- 31 14. Riihimäki K, Vuorilehto M, Melartin T, et al. Five-year outcome of major depressive  
32  
33 disorder in primary health care. *Psychological medicine* 2014;44(7):1369-79.  
34
- 35 15. Judd LL, Schettler PJ, Solomon DA, et al. Psychosocial disability and work role  
36  
37 function compared across the long-term course of bipolar I, bipolar II and unipolar  
38  
39 major depressive disorders. *Journal of affective disorders* 2008;108(1):49-58.  
40
- 41 16. Riihimäki K, Vuorilehto M, Isometsä E. A 5-year prospective study of predictors for  
42  
43 functional and work disability among primary care patients with depressive  
44  
45 disorders. *European Psychiatry* 2015;30(1):51-57.  
46
- 47 17. Vitiello B, Rohde P, Silva S, et al. Functioning and quality of life in the Treatment for  
48  
49 Adolescents with Depression Study (TADS). *Journal of the American Academy of*  
50  
51 *Child & Adolescent Psychiatry* 2006;45(12):1419-26.  
52  
53  
54  
55  
56  
57  
58  
59

- 1  
2  
3 18. Wagner KD, Ambrosini P, Rynn M, et al. Efficacy of sertraline in the treatment of  
4  
5 children and adolescents with major depressive disorder: two randomized  
6  
7 controlled trials. *JAMA : the journal of the American Medical Association*  
8  
9 2003;290(8):1033-41. doi: 10.1001/jama.290.8.1033 [published Online First:  
10  
11 2003/08/28]  
12  
13  
14 19. Brent DA, Holder D, Kolko D, et al. A clinical psychotherapy trial for adolescent  
15  
16 depression comparing cognitive, family, and supportive therapy. *Archives of*  
17  
18 *general psychiatry* 1997;54(9):877-85.  
19  
20 20. Peters AT, Jacobs RH, Feldhaus C, et al. Trajectories of functioning into emerging  
21  
22 adulthood following treatment for adolescent depression. *Journal of Adolescent*  
23  
24 *Health* 2016;58(3):253-59.  
25  
26  
27 21. Hodgekins J, Birchwood M, Christopher R, et al. Investigating trajectories of social  
28  
29 recovery in individuals with first-episode psychosis: a latent class growth analysis.  
30  
31 *The British Journal of Psychiatry* 2015;207(6):536-43.  
32  
33  
34 22. Santesteban-Echarri O, Paino M, Rice S, et al. Predictors of functional recovery in  
35  
36 first-episode psychosis: A systematic review and meta-analysis of longitudinal  
37  
38 studies. *Clinical psychology review* 2017  
39  
40 23. Fowler D, Hodgekins J, Painter M, et al. Cognitive behaviour therapy for improving  
41  
42 social recovery in psychosis: a report from the ISREP MRC Trial Platform Study  
43  
44 (Improving Social Recovery in Early Psychosis). *Psychol Med* 2009;39(10):1627-  
45  
46 36. doi: 10.1017/s0033291709005467 [published Online First: 2009/04/02]  
47  
48  
49 24. Hickie IB, Scott EM, Hermens DF, et al. Applying clinical staging to young people  
50  
51 who present for mental health care. *Early intervention in psychiatry* 2013;7(1):31-  
52  
53 43. doi: 10.1111/j.1751-7893.2012.00366.x [published Online First: 2012/06/08]  
54  
55  
56  
57  
58  
59

- 1  
2  
3 25. McGorry PD, Hickie IB, Yung AR, et al. Clinical staging of psychiatric disorders: a  
4  
5 heuristic framework for choosing earlier, safer and more effective interventions.  
6  
7 *The Australian and New Zealand journal of psychiatry* 2006;40(8):616-22. doi:  
8  
9 10.1111/j.1440-1614.2006.01860.x [published Online First: 2006/07/27]  
10  
11  
12 26. McGorry P, Bates T, Birchwood M. Designing youth mental health services for the  
13  
14 21st century: examples from Australia, Ireland and the UK. *The British Journal of*  
15  
16 *Psychiatry* 2013;202(s54):s30-s35.  
17  
18 27. Scott J, Scott EM, Hermens DF, et al. Functional impairment in adolescents and young  
19  
20 adults with emerging mood disorders. *The British journal of psychiatry : the*  
21  
22 *journal of mental science* 2014;205(5):362-8. doi: 10.1192/bjp.bp.113.134262  
23  
24 [published Online First: 2014/09/13]  
25  
26  
27 28. O'Dea B, Glozier N, Purcell R, et al. A cross-sectional exploration of the clinical  
28  
29 characteristics of disengaged (NEET) young people in primary mental healthcare.  
30  
31 *BMJ open* 2014;4(12):e006378.  
32  
33 29. Scott EM, Hermens DF, Glozier N, et al. Targeted primary care-based mental health  
34  
35 services for young Australians. *Med J Aust* 2012;196(2):136-40.  
36  
37  
38 30. O'Dea B, Lee RS, McGorry PD, et al. A prospective cohort study of depression  
39  
40 course, functional disability, and NEET status in help-seeking young adults. *Social*  
41  
42 *psychiatry and psychiatric epidemiology* 2016;51(10):1395-404.  
43  
44 31. Judd LL, Akiskal HS, Zeller PJ, et al. Psychosocial disability during the long-term  
45  
46 course of unipolar major depressive disorder. *Archives of general psychiatry*  
47  
48 2000;57(4):375-80.  
49  
50 32. Rickwood DJ, Mazzer KR, Telford NR, et al. Changes in psychological distress and  
51  
52 psychosocial functioning in young people visiting headspace centres for mental  
53  
54 health problems. *The Medical Journal of Australia* 2015;202(10):537-42.  
55  
56  
57  
58  
59  
60



- 1  
2  
3 33. Cross SP, Hermens DF, Hickie IB. Treatment patterns and short-term outcomes in an  
4  
5 early intervention youth mental health service. *Early intervention in psychiatry*  
6  
7 2016;10(1):88-97.  
8  
9 34. Cross SP, Scott J, Hermens DF, et al. Clinical outcomes for youth with subthreshold  
10  
11 severe mental disorders accessing an early intervention service. *Psychiatric*  
12  
13 *Services* (In press)  
14  
15 35. McGorry PD, Tanti C, Stokes R, et al. headspace: Australia's National Youth Mental  
16  
17 Health Foundation-where young minds come first. *Medical Journal of Australia*  
18  
19 2007;187(7):S68.  
20  
21 36. Goldman HH, Skodol AE, Lave TR. Revising axis V for DSM-IV: a review of  
22  
23 measures of social functioning. *Am J Psychiatry* 1992;149(9):1148-56.  
24  
25 37. Falkenström F. Does psychotherapy for young adults in routine practice show similar  
26  
27 results as therapy in randomized clinical trials? *Psychotherapy Research*  
28  
29 2010;20(2):181-92.  
30  
31 38. Power E, Clarke M, Kelleher I, et al. The association between economic inactivity and  
32  
33 mental health among young people: a longitudinal study of young adults who are  
34  
35 not in employment, education or training. *Irish journal of psychological medicine*  
36  
37 2015;32(1):155-60.  
38  
39 39. Rodwell L, Romaniuk H, Nilsen W, et al. Adolescent mental health and behavioural  
40  
41 predictors of being NEET: a prospective study of young adults not in employment,  
42  
43 education, or training. *Psychological Medicine* 2017:1-11.  
44  
45 40. Burns T, Catty J, Becker T, et al. The effectiveness of supported employment for  
46  
47 people with severe mental illness: a randomised controlled trial. *The Lancet*  
48  
49 2007;370(9593):1146-52.  
50  
51  
52  
53  
54  
55  
56  
57  
58  
59  
60

- 1  
2  
3 41. Drake RE, McHugo GJ, Bebout RR, et al. A randomized clinical trial of supported  
4 employment for inner-city patients with severe mental disorders. *Archives of*  
5 *general psychiatry* 1999;56(7):627-33.  
6  
7  
8  
9 42. Fowler D, Hodgekins J, French P, et al. Social recovery therapy in combination with  
10 early intervention services for enhancement of social recovery in patients with  
11 first-episode psychosis (SUPEREDEN3): a single-blind, randomised controlled  
12 trial. *The Lancet Psychiatry* doi: 10.1016/S2215-0366(17)30476-5  
13  
14  
15  
16  
17 43. Boswell JF, Kraus DR, Miller SD, et al. Implementing routine outcome monitoring in  
18 clinical practice: Benefits, challenges, and solutions. *Psychotherapy research*  
19 2015;25(1):6-19.  
20  
21  
22  
23 44. Cross SP, Hickie I. Transdiagnostic stepped care in mental health. *Public health*  
24 *research & practice* 2017;27(2)  
25  
26  
27  
28 45. Carlier IV, Meuldijk D, Van Vliet IM, et al. Routine outcome monitoring and  
29 feedback on physical or mental health status: evidence and theory. *Journal of*  
30 *Evaluation in Clinical Practice* 2012;18(1):104-10.  
31  
32  
33  
34 46. Lee R, Hermens D, Scott J, et al. A transdiagnostic study of education, employment,  
35 and training outcomes in young people with mental illness. *Psychological*  
36 *Medicine* 2017:1-10.  
37  
38  
39  
40 47. Iorfino F, Hickie IB, Lee RS, et al. The underlying neurobiology of key functional  
41 domains in young people with mood and anxiety disorders: a systematic review.  
42 *BMC psychiatry* 2016;16(1):1.  
43  
44  
45  
46  
47 48. Lee R, Hermens DF, Redoblado-Hodge MA, et al. Neuropsychological and Socio-  
48 Occupational Functioning in Young Psychiatric Outpatients: A Longitudinal  
49 Investigation. *PloS one* 2013;8(3):e58176.  
50  
51  
52  
53  
54  
55  
56  
57  
58  
59  
60

1  
2  
3  
4  
5  
6  
7  
8  
9  
10  
11  
12  
13  
14  
15  
16  
17  
18  
19  
20  
21  
22  
23  
24  
25  
26  
27  
28  
29  
30  
31  
32  
33  
34  
35  
36  
37  
38  
39  
40  
41  
42  
43  
44  
45  
46  
47  
48  
49  
50  
51  
52  
53  
54  
55  
56  
57  
58  
59  
60

For peer review only

1  
2  
3 Figure 1 shows the frequency of the total number of time points recorded for each  
4 participant (median = 4; light grey bar).  
5  
6  
7

8 Figure 2 shows the distribution of the total follow up time for each participant in  
9 months. The bars have been shaded into quartiles (median = 23 months). The  
10 majority of participants (50%) were followed up between 9 months and 49 months  
11 (i.e. 4 years) after initial presentation, while 25% were followed up between 1 and 8  
12 months, and the remaining 25% followed up between 50 months (i.e 4 years) and  
13 126 months (i.e. 10 years).  
14  
15  
16

17  
18 Figure 3 shows the six distinct trajectories identified for SOFAS score over a five year  
19 period. The thickness of each line represents the sample size of that particular  
20 trajectory, relative to all others. The dotted line represents the clinical impairment  
21 cut-off, which is set at a SOFAS score of 69. Slight impairment – stable (n=24, 4%),  
22 intercept equal to 78 and linear trend over time; Mild impairment – improvement  
23 (n=129, 23%), intercept equal to 68 and quadratic trend over time; Moderate  
24 impairment – chronic (n=185, 33%), intercept equal to 61 and linear trend over  
25 time; Serious impairment – chronic (n=158, 29%), intercept equal to 55 and linear  
26 trend over time; Serious impairment – improvement (n=19, 4%), intercept equal to  
27 42 and quadratic trend over time; Serious impairment – deterioration (n=39, 7%),  
28 intercept equal to 51 and quadratic trend over time.  
29  
30  
31  
32  
33  
34  
35  
36  
37  
38  
39  
40  
41  
42  
43  
44  
45  
46  
47  
48  
49  
50  
51  
52  
53  
54  
55  
56  
57  
58  
59  
60

1  
2  
3  
4  
5  
6  
7  
8  
9  
10  
11  
12  
13  
14  
15  
16  
17  
18  
19  
20  
21  
22  
23  
24  
25  
26  
27  
28  
29  
30  
31  
32  
33  
34  
35  
36  
37  
38  
39  
40  
41  
42  
43  
44  
45  
46  
47  
48  
49  
50  
51  
52  
53  
54  
55  
56  
57  
58  
59  
60



Figure 1 shows the frequency of the total number of time points recorded for each participant (median = 4; light grey bar).

129x69mm (300 x 300 DPI)

Review only

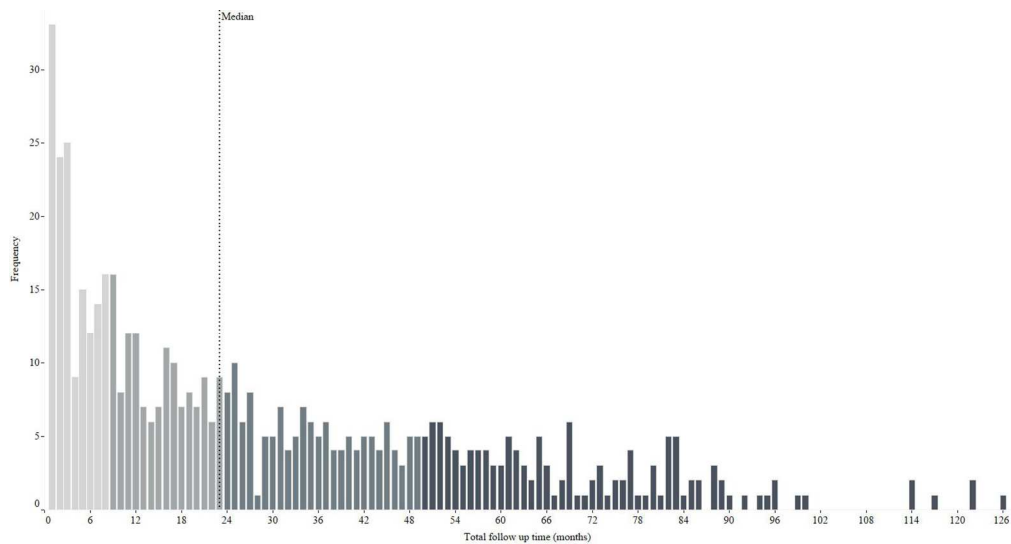

Figure 2 shows the distribution of the total follow up time for each participant in months. The bars have been shaded into quartiles (median = 23 months). The majority of participants (50%) were followed up between 9 months and 49 months (i.e. 4 years) after initial presentation, while 25% were followed up between 1 and 8 months, and the remaining 25% followed up between 50 months (i.e 4 years) and 126 months (i.e. 10 years).

129x69mm (300 x 300 DPI)

view only



Figure 3 shows the six distinct trajectories identified for SOFAS score over a five year period. The thickness of each line represents the sample size of that particular trajectory, relative to all others. The dotted line represents the clinical impairment cut-off, which is set at a SOFAS score of 69. Slight impairment – stable (n=24, 4%), intercept equal to 78 and linear trend over time; Mild impairment – improvement (n=129, 23%), intercept equal to 68 and quadratic trend over time; Moderate impairment – chronic (n=185, 33%), intercept equal to 61 and linear trend over time; Serious impairment – chronic (n=158, 29%), intercept equal to 55 and linear trend over time; Serious impairment – improvement (n=19, 4%), intercept equal to 42 and quadratic trend over time; Serious impairment – deterioration (n=39, 7%), intercept equal to 51 and quadratic trend over time.

97x68mm (300 x 300 DPI)





1  
2  
3  
4  
5  
6  
7  
8  
9  
10  
11  
12  
13  
14  
15  
16  
17  
18  
19  
20  
21  
22  
23  
24  
25  
26  
27  
28  
29  
30  
31  
32  
33  
34  
35  
36  
37  
38  
39  
40  
41  
42  
43  
44  
45  
46  
47  
48  
49  
50  
51  
52  
53  
54  
55  
56  
57  
58  
59  
60

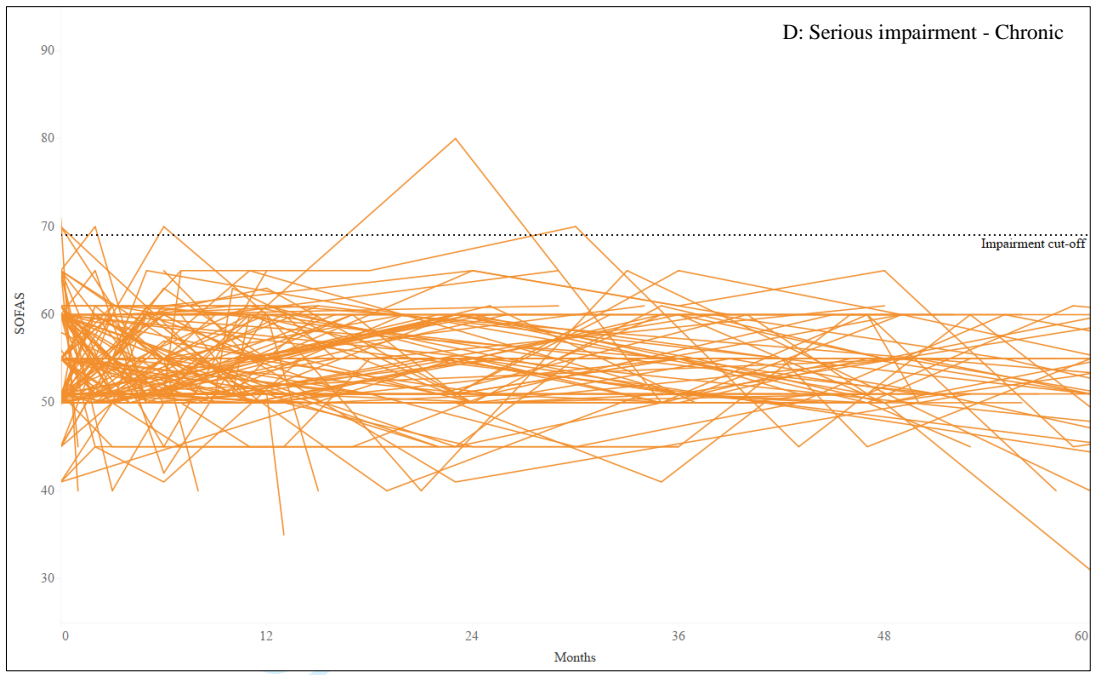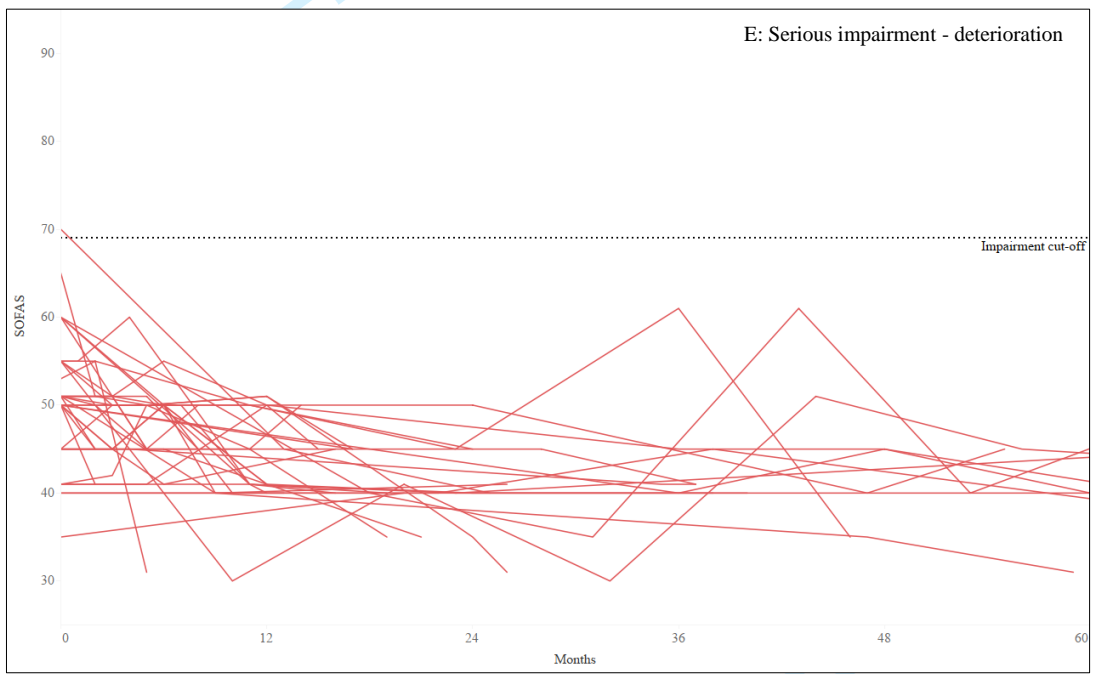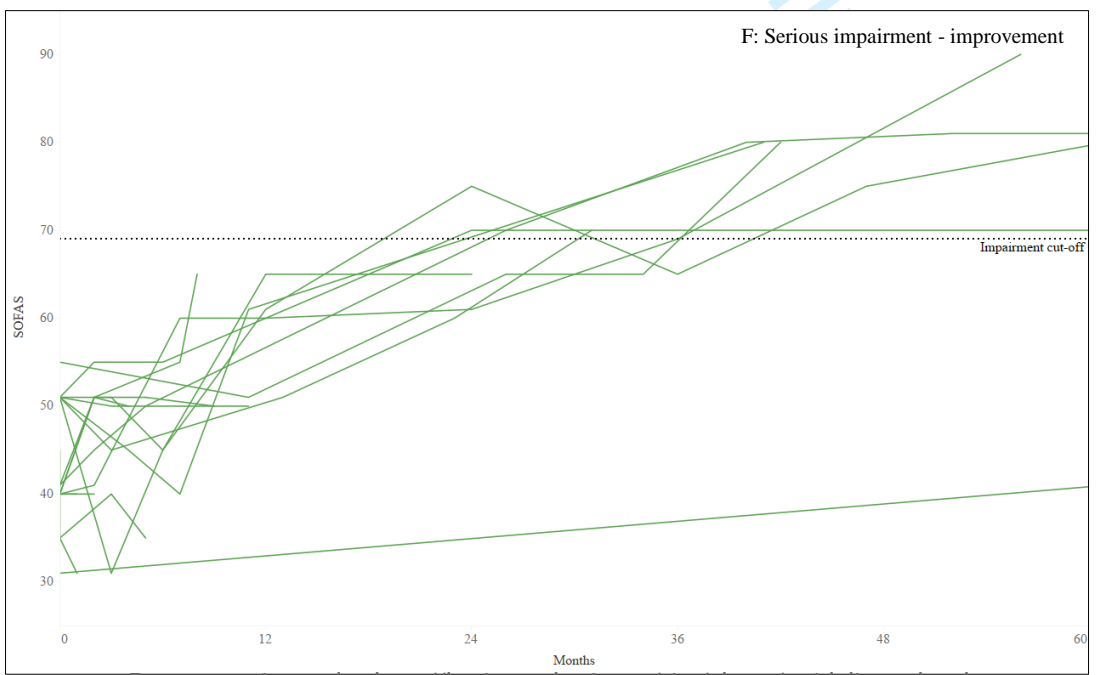

**Supplementary Figure 1 caption**

Supplementary figure 1 shows the individual-level trajectories for each group identified and shown in figure 1. Each line represents one individual and their SOFAS score ratings over time. The dotted line represents the clinical impairment cut-off, which is set at a SOFAS score of 69. Panel A: Slight impairment – stable (n=24, 4%), intercept equal to 78 and linear trend over time; Panel B: Mild impairment – improvement (n=129, 23%), intercept equal to 68 and quadratic trend over time; Panel C: Moderate impairment – chronic (n=185, 33%), intercept equal to 61 and linear trend over time; Panel D: Serious impairment – chronic (n=158, 29%), intercept equal to 55 and linear trend over time; Panel E: Serious impairment – improvement (n=19, 4%), intercept equal to 42 and quadratic trend over time; Panel F: Serious impairment – deterioration (n=39, 7%), intercept equal to 51 and quadratic trend over time.

For peer review only

STROBE Statement—Checklist of items that should be included in reports of *cohort studies*

|                          | Item No | Recommendation                                                                                                                                                                                    |            |
|--------------------------|---------|---------------------------------------------------------------------------------------------------------------------------------------------------------------------------------------------------|------------|
| Title and abstract       | 1       | (a) Indicate the study's design with a commonly used term in the title or the abstract                                                                                                            | P1         |
|                          |         | (b) Provide in the abstract an informative and balanced summary of what was done and what was found                                                                                               | P2         |
| <b>Introduction</b>      |         |                                                                                                                                                                                                   |            |
| Background/rationale     | 2       | Explain the scientific background and rationale for the investigation being reported                                                                                                              | P4-5       |
| Objectives               | 3       | State specific objectives, including any prespecified hypotheses                                                                                                                                  | P5         |
| <b>Methods</b>           |         |                                                                                                                                                                                                   |            |
| Study design             | 4       | Present key elements of study design early in the paper                                                                                                                                           | P5-6       |
| Setting                  | 5       | Describe the setting, locations, and relevant dates, including periods of recruitment, exposure, follow-up, and data collection                                                                   | P5         |
| Participants             | 6       | (a) Give the eligibility criteria, and the sources and methods of selection of participants. Describe methods of follow-up                                                                        | P5         |
|                          |         | (b) For matched studies, give matching criteria and number of exposed and unexposed                                                                                                               | -          |
| Variables                | 7       | Clearly define all outcomes, exposures, predictors, potential confounders, and effect modifiers. Give diagnostic criteria, if applicable                                                          | P5-7       |
| Data sources/measurement | 8*      | For each variable of interest, give sources of data and details of methods of assessment (measurement). Describe comparability of assessment methods if there is more than one group              | P6         |
| Bias                     | 9       | Describe any efforts to address potential sources of bias                                                                                                                                         | -          |
| Study size               | 10      | Explain how the study size was arrived at                                                                                                                                                         | -          |
| Quantitative variables   | 11      | Explain how quantitative variables were handled in the analyses. If applicable, describe which groupings were chosen and why                                                                      | P7         |
| Statistical methods      | 12      | (a) Describe all statistical methods, including those used to control for confounding                                                                                                             | P7         |
|                          |         | (b) Describe any methods used to examine subgroups and interactions                                                                                                                               | P7         |
|                          |         | (c) Explain how missing data were addressed                                                                                                                                                       | P6-7       |
|                          |         | (d) If applicable, explain how loss to follow-up was addressed                                                                                                                                    |            |
|                          |         | (e) Describe any sensitivity analyses                                                                                                                                                             |            |
| <b>Results</b>           |         |                                                                                                                                                                                                   |            |
| Participants             | 13*     | (a) Report numbers of individuals at each stage of study—eg numbers potentially eligible, examined for eligibility, confirmed eligible, included in the study, completing follow-up, and analysed | P7         |
|                          |         | (b) Give reasons for non-participation at each stage                                                                                                                                              | P6         |
|                          |         | (c) Consider use of a flow diagram                                                                                                                                                                |            |
| Descriptive data         | 14*     | (a) Give characteristics of study participants (eg demographic, clinical, social) and information on exposures and potential confounders                                                          | P7,8,12,13 |
|                          |         | (b) Indicate number of participants with missing data for each variable of interest                                                                                                               | P7-8       |
|                          |         | (c) Summarise follow-up time (eg, average and total amount)                                                                                                                                       | P8         |
| Outcome data             | 15*     | Report numbers of outcome events or summary measures over time                                                                                                                                    | P8-13      |
| Main results             | 16      | (a) Give unadjusted estimates and, if applicable, confounder-adjusted estimates and their precision (eg, 95% confidence interval). Make clear                                                     | P11-12     |

|                          |    |                                                                                                                                                                            |        |
|--------------------------|----|----------------------------------------------------------------------------------------------------------------------------------------------------------------------------|--------|
|                          |    | which confounders were adjusted for and why they were included                                                                                                             |        |
|                          |    | (b) Report category boundaries when continuous variables were categorized                                                                                                  | -      |
|                          |    | (c) If relevant, consider translating estimates of relative risk into absolute risk for a meaningful time period                                                           | -      |
| Other analyses           | 17 | Report other analyses done—eg analyses of subgroups and interactions, and sensitivity analyses                                                                             | P8-11  |
| <b>Discussion</b>        |    |                                                                                                                                                                            |        |
| Key results              | 18 | Summarise key results with reference to study objectives                                                                                                                   | P13-14 |
| Limitations              | 19 | Discuss limitations of the study, taking into account sources of potential bias or imprecision. Discuss both direction and magnitude of any potential bias                 | P15-16 |
| Interpretation           | 20 | Give a cautious overall interpretation of results considering objectives, limitations, multiplicity of analyses, results from similar studies, and other relevant evidence | P14-15 |
| Generalisability         | 21 | Discuss the generalisability (external validity) of the study results                                                                                                      | P14-16 |
| <b>Other information</b> |    |                                                                                                                                                                            |        |
| Funding                  | 22 | Give the source of funding and the role of the funders for the present study and, if applicable, for the original study on which the present article is based              | P17    |

\*Give information separately for exposed and unexposed groups.

**Note:** An Explanation and Elaboration article discusses each checklist item and gives methodological background and published examples of transparent reporting. The STROBE checklist is best used in conjunction with this article (freely available on the Web sites of PLoS Medicine at <http://www.plosmedicine.org/>, Annals of Internal Medicine at <http://www.annals.org/>, and Epidemiology at <http://www.epidem.com/>). Information on the STROBE Initiative is available at <http://www.strobe-statement.org>.
